# Supplementary material for: Isolation of oligostilbenes fromIris lacteaPall. var.chinensis(Fisch.) Koidz and their anti-inflammatory activities
Source: Royal Society of Chemistry journal article supplement (doi:10.1039/d2ra05176a), 2022-01-01
Supplement: d2ra05176a1.pdf [file d2ra05176a1.pdf]

## Supporting Information

### Isolation of oligostilbenes from *Iris lactea* Pall. var. *chinensis* (Fisch.)

#### Koidz and their anti-inflammatory activities

Fang-Fang Tie<sup>a</sup>, Yang-Yang Fu<sup>a</sup>, Na Hu<sup>a</sup>, Zhi Chen<sup>b</sup>, Hong-Lun Wang<sup>a,\*</sup>

<sup>a</sup>Qinghai Provincial Key Laboratory of Tibetan Medicine Research and CAS Key Laboratory of Tibetan Medicine Research, Northwest Institute of Plateau Biology, Xining 810008, P.R. China.

<sup>b</sup>Key Laboratory of Medicinal Animal and Plant Resources of Qinghai-Tibetan Plateau in Qinghai Province, Xining 810008, P.R. China

## Content

- Figure S1. Chemical structures of isolated oligostilbenes from seeds of *Iris lactea*
- Figure S2. The purity HPLC chromatograms of compounds 1, 2, 3 and 4
- Figure S3. The primary and secondary mass spectra and chemical structure of the impurity
- Figure S4. The effects of compounds 1, 2, 3 and 4 on the viability of cells *in vitro*
- Figure S5. The <sup>1</sup>H-NMR chromatography of compound 1
- Figure S6. The <sup>13</sup>C-NMR and DEPT chromatography of compound 1
- Figure S7. The HSQC chromatography of compound 1
- Figure S8. The HMBC chromatography of compound 1
- Figure S9. The H-H COSY chromatography of compound 1
- Figure S10. The ROESY chromatography of compound 1
- Figure S11. The HR-ESI mass spectrum of compound 1
- Figure S12. Experimental IR Spectrum of compound 1
- Figure S13. Experimental UV Spectrum of compound 1
- Figure S14. The <sup>1</sup>H-NMR chromatography of compound 2
- Figure S15. The <sup>13</sup>C-NMR chromatography of compound 2
- Figure S16. The <sup>1</sup>H-NMR chromatography of compound 3
- Figure S17. The <sup>13</sup>C-NMR chromatography of compound 3
- Figure S18. The <sup>1</sup>H-NMR chromatography of compound 4
- Figure S19. The <sup>13</sup>C-NMR chromatography of compound 4
- Table S1. The degree of the compounds and targets in the compound-target network.
- Table S2. Result of KEGG enrichment analysis
- Table S3. Result of GO enrichment analysis

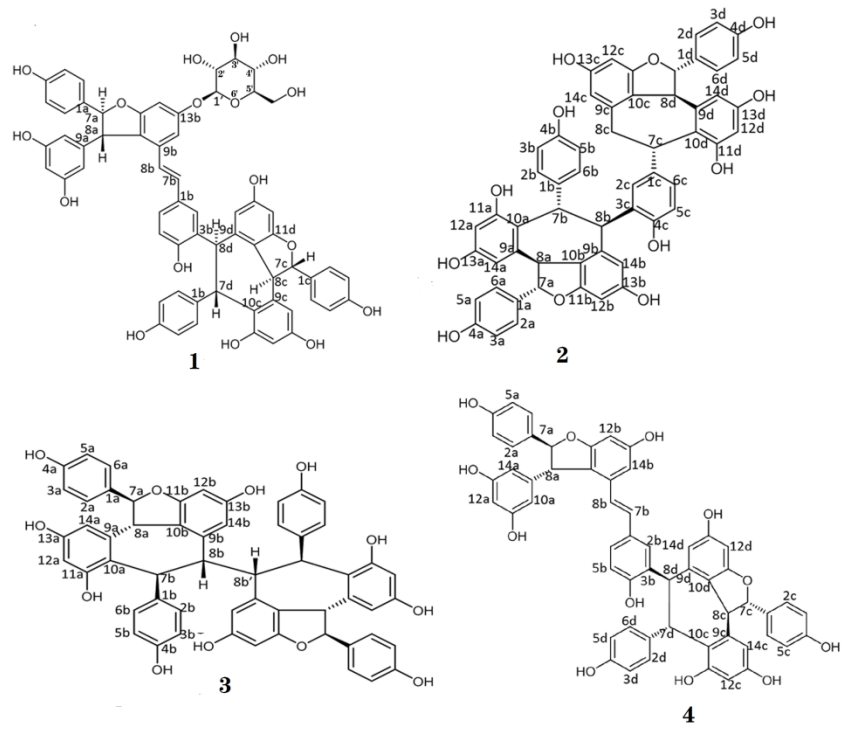

Figure S1. Chemical structures of isolated oligostilbenes from seeds of *Iris lactea*.

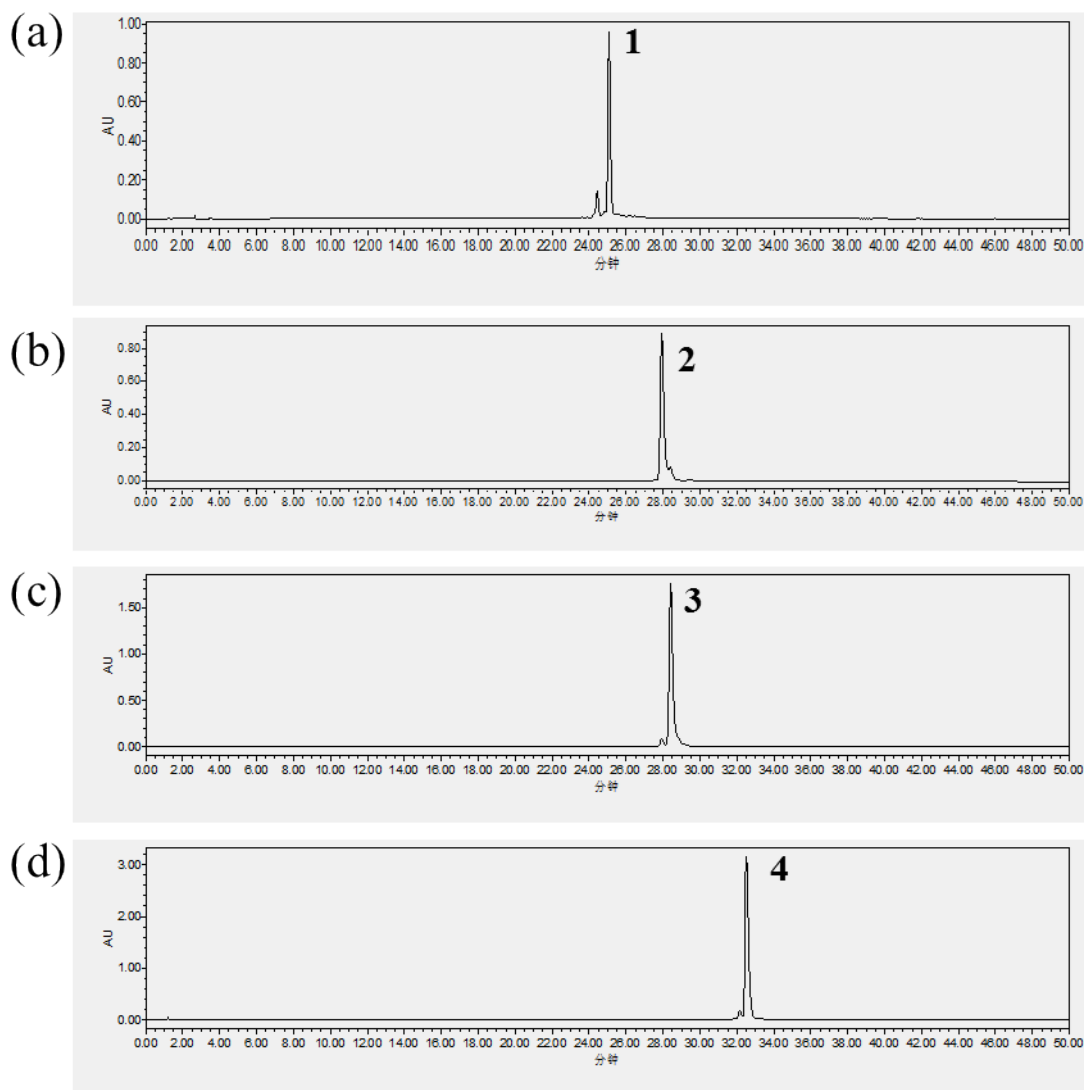

Figure S2. The purity HPLC chromatograms of compounds 1, 2, 3 and 4

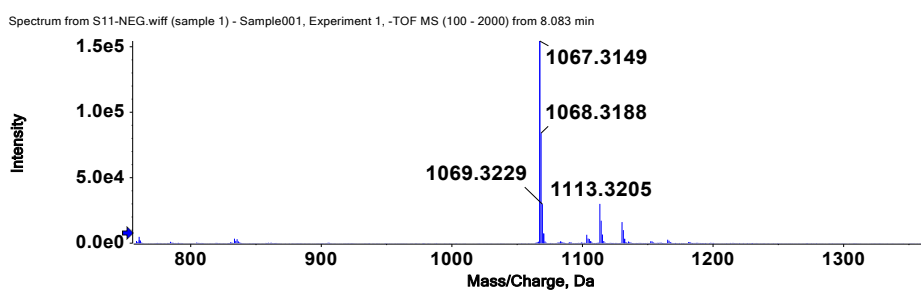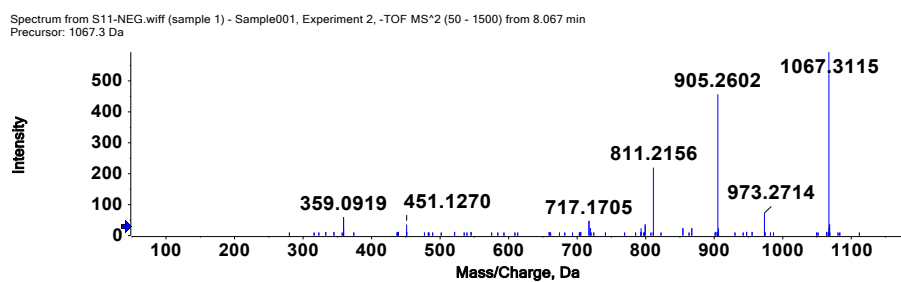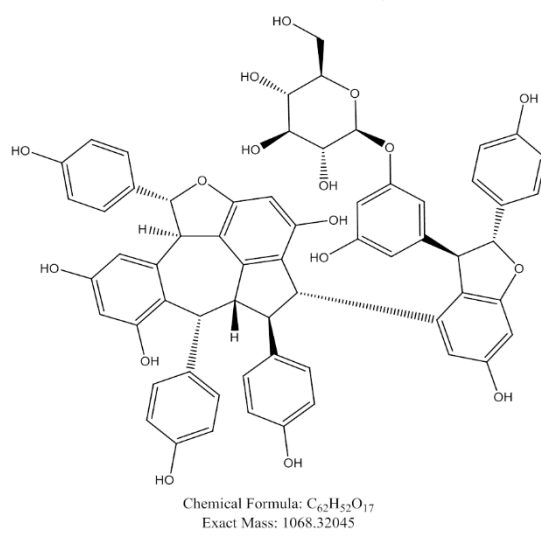

Figure S3 The primary and secondary mass spectra and chemical structure of the impurity

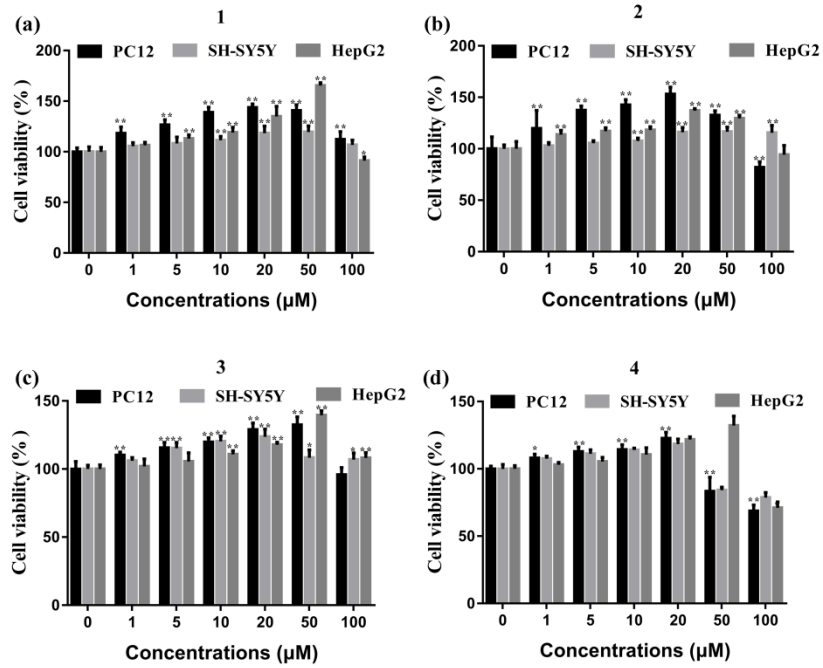

Figure S4. The effects of compounds 1, 2, 3 and 4 on the viability of cells *in vitro*. (a) The effects of compound 1 on the viability cells (PC12, SH-SY5Y and HepG2), (b) The effects of compound 2 on the viability cells (PC12, SH-SY5Y and HepG2), (c) The effects of compound 3 on the viability cells (PC12, SH-SY5Y and HepG2), (d) The effects of compound 4 on the viability cells (PC12, SH-SY5Y and HepG2). \* $P < 0.05$  and \*\* $P < 0.01$  compared to the control group.

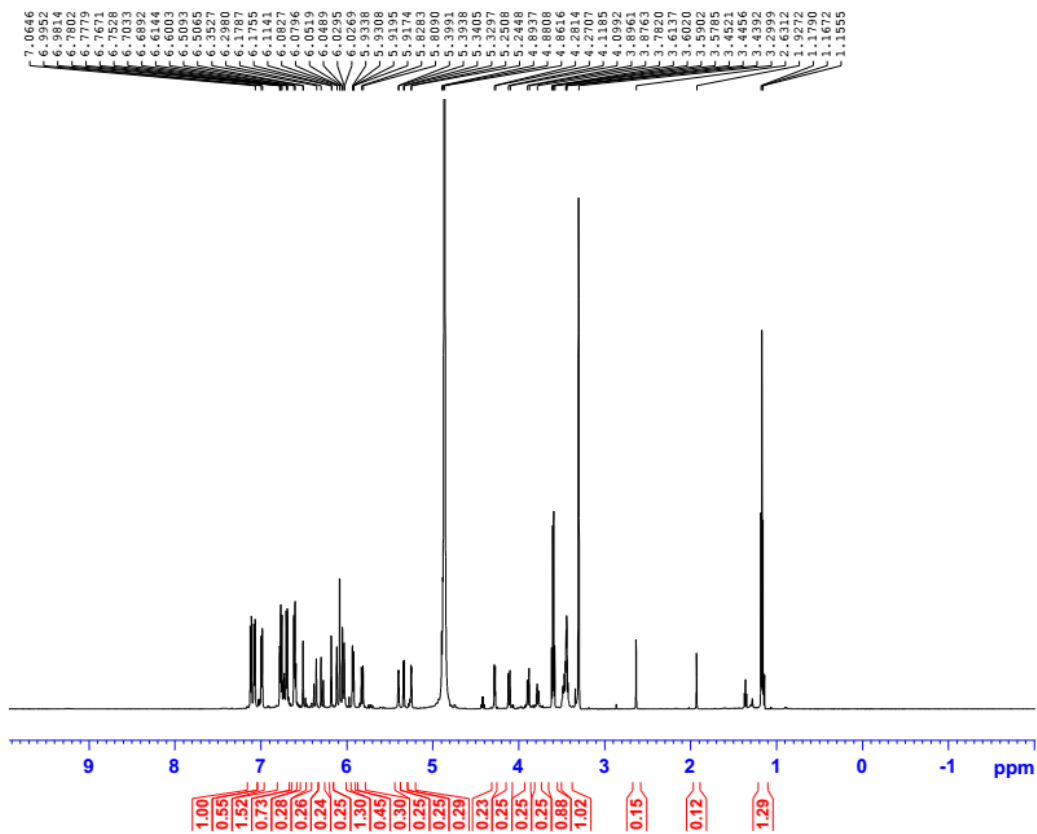

Figure S5. The  $^1\text{H}$ -NMR chromatography of compound 1

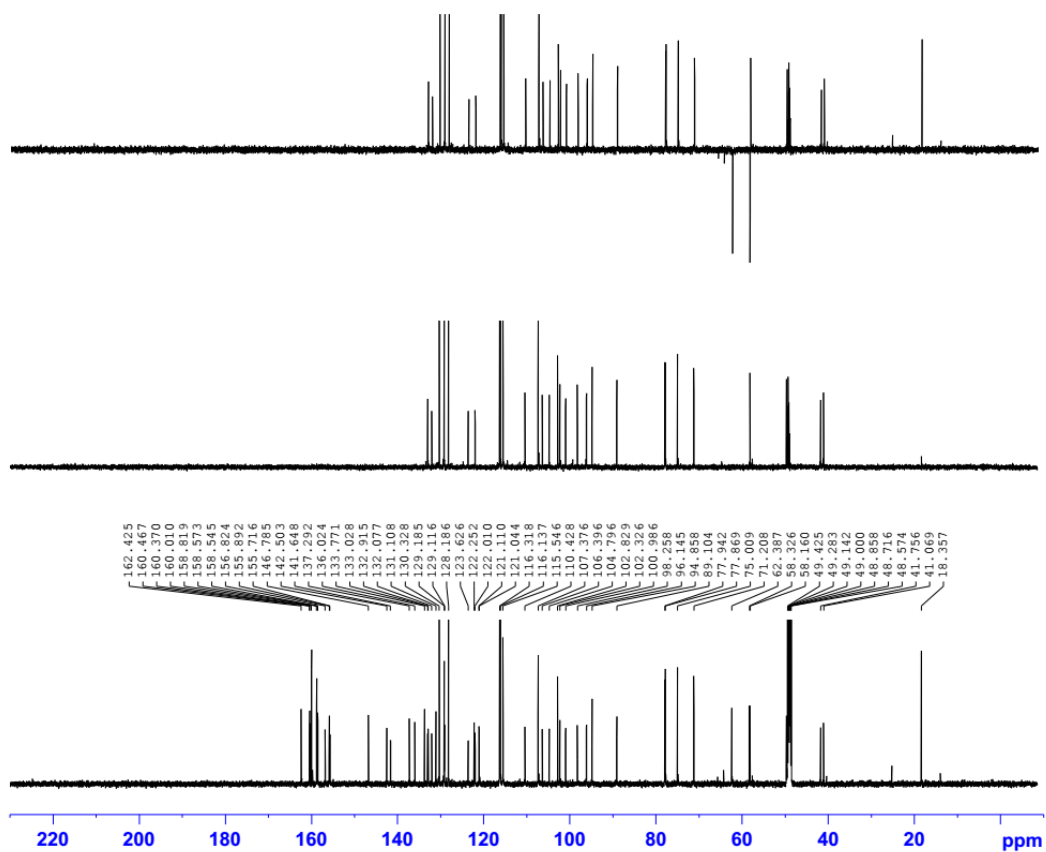

Figure S6. The  $^{13}\text{C}$ -NMR and DEPT chromatography of compound 1



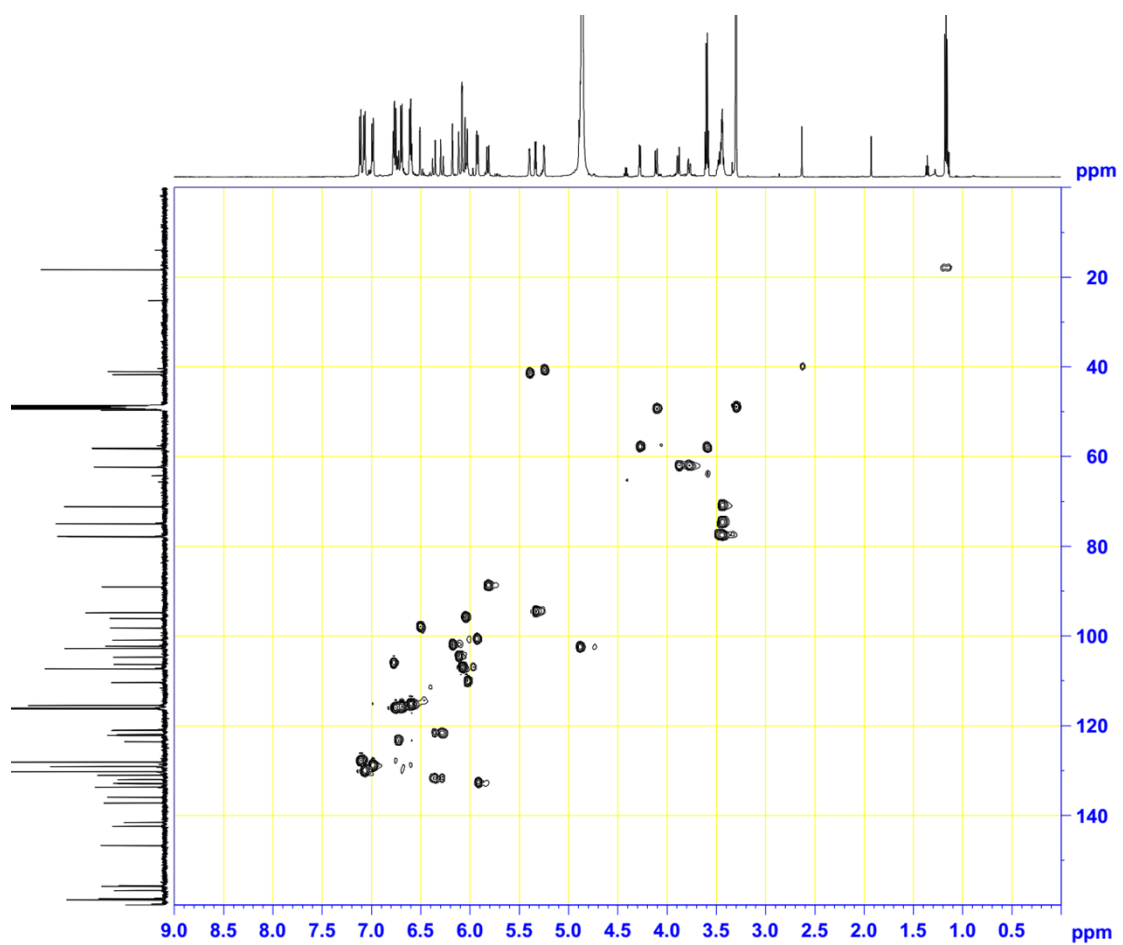

Figure S7. The HSQC chromatography of compound 1

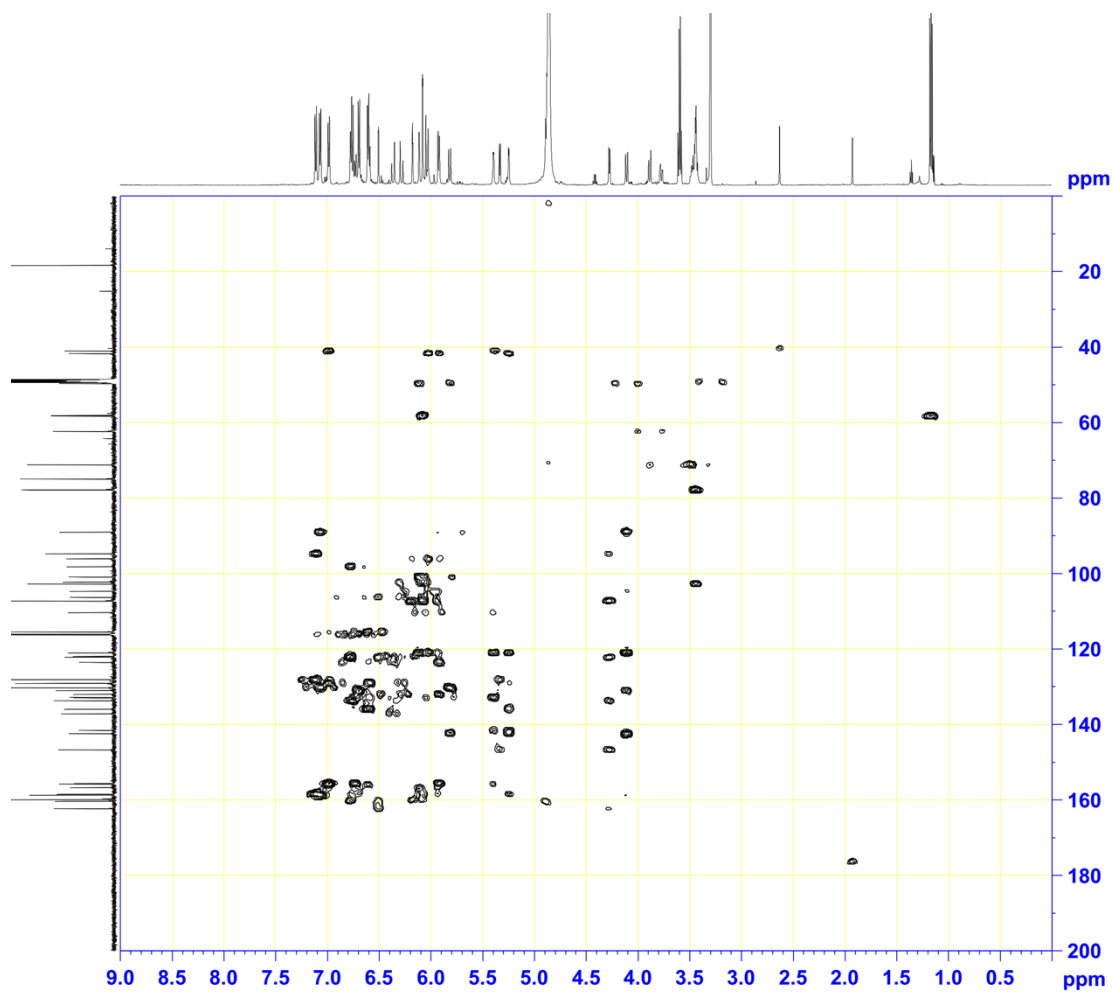

Figure S8. The HMBC chromatography of compound 1

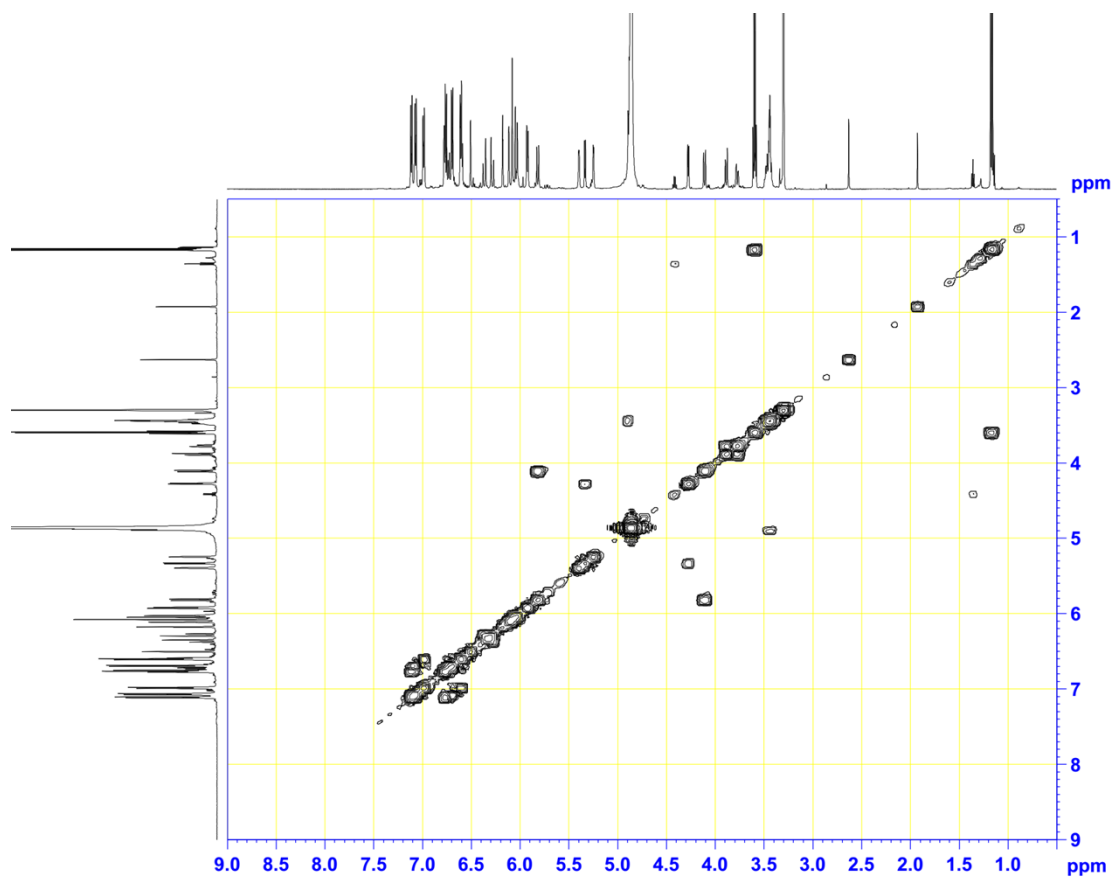

Figure S9. The H-H COSY chromatography of compound 1

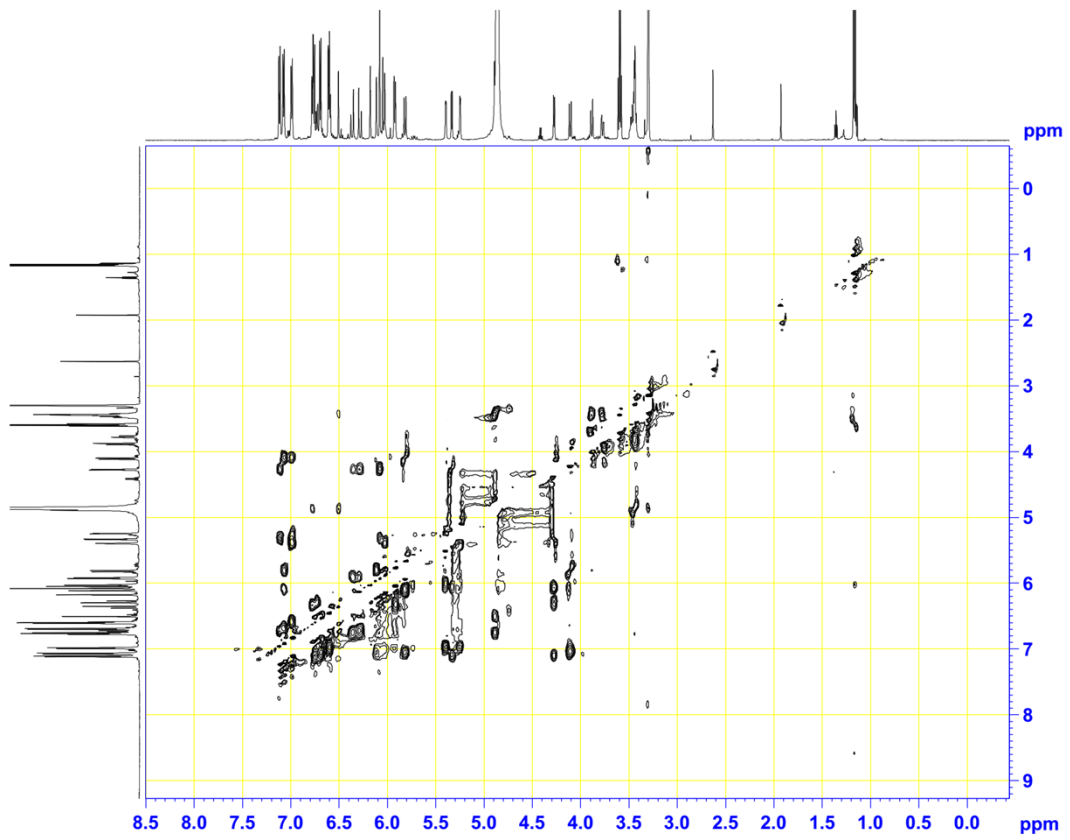

Figure S10. The ROESY chromatography of compound 1

Event#: 1 MS(E+) Ret. Time : 0.475 Scan#: 61

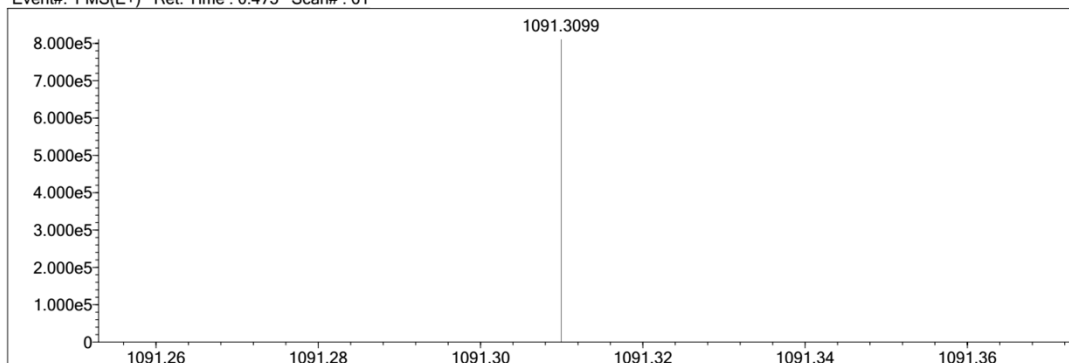

Measured region for 1091.3099 m/z

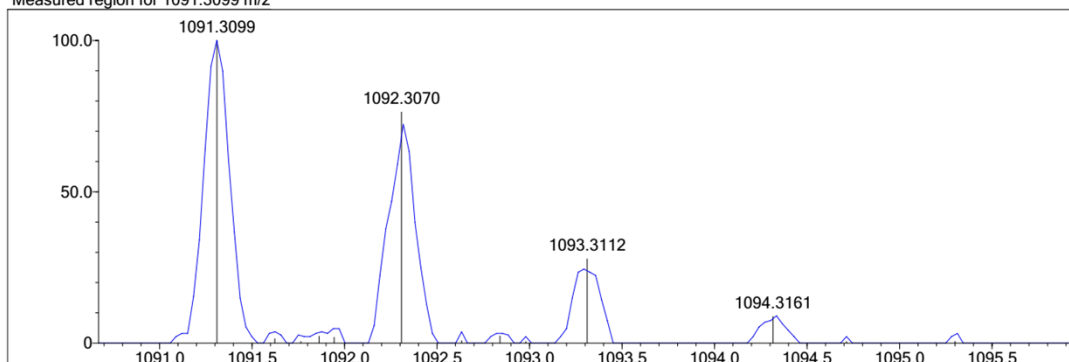

C62 H52 O17 [M+Na]<sup>+</sup> : Predicted region for 1091.3097 m/z

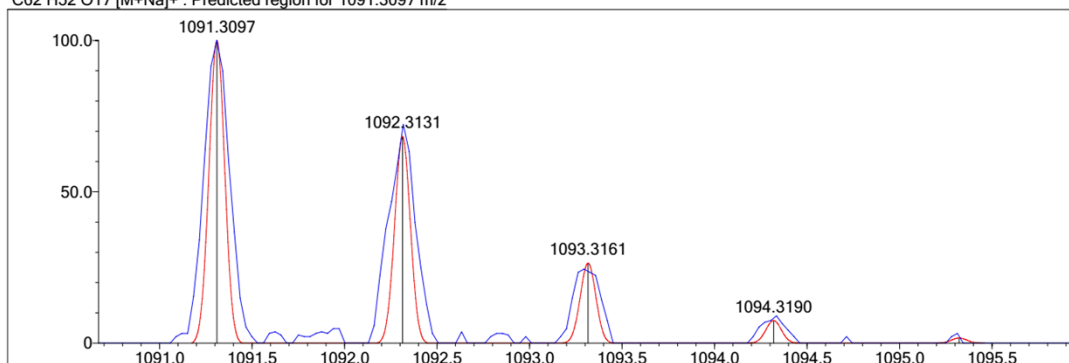

| Formula (M) | Ion                 | Meas. m/z | Pred. m/z | Df. (mDa) | Df. (ppm) | DBE  |
|-------------|---------------------|-----------|-----------|-----------|-----------|------|
| C62 H52 O17 | [M+Na] <sup>+</sup> | 1091.3099 | 1091.3097 | 0.2       | 0.18      | 37.0 |

Figure S11. The HR-ESI mass spectrum of compound 1

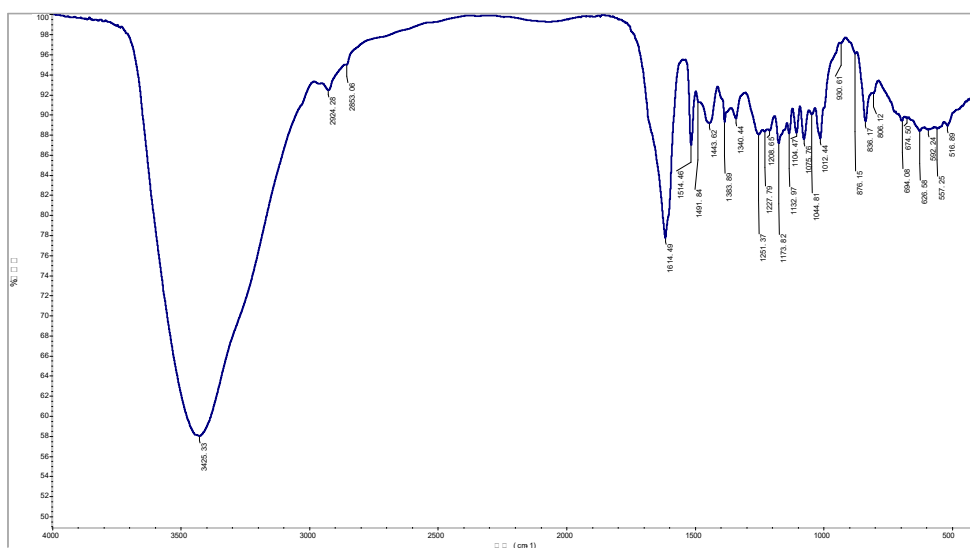

Figure S12. Experimental IR Spectrum of compound 1

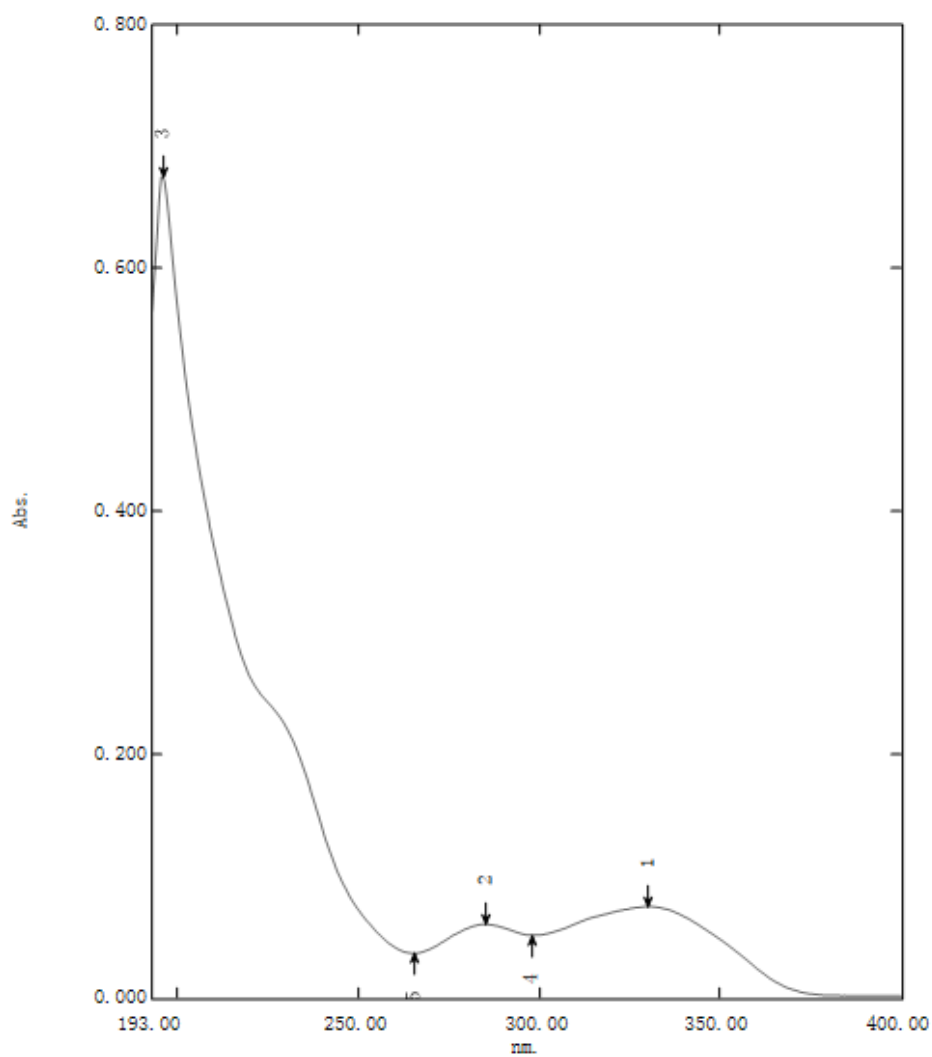

Figure S13. Experimental UV Spectrum of compound 1

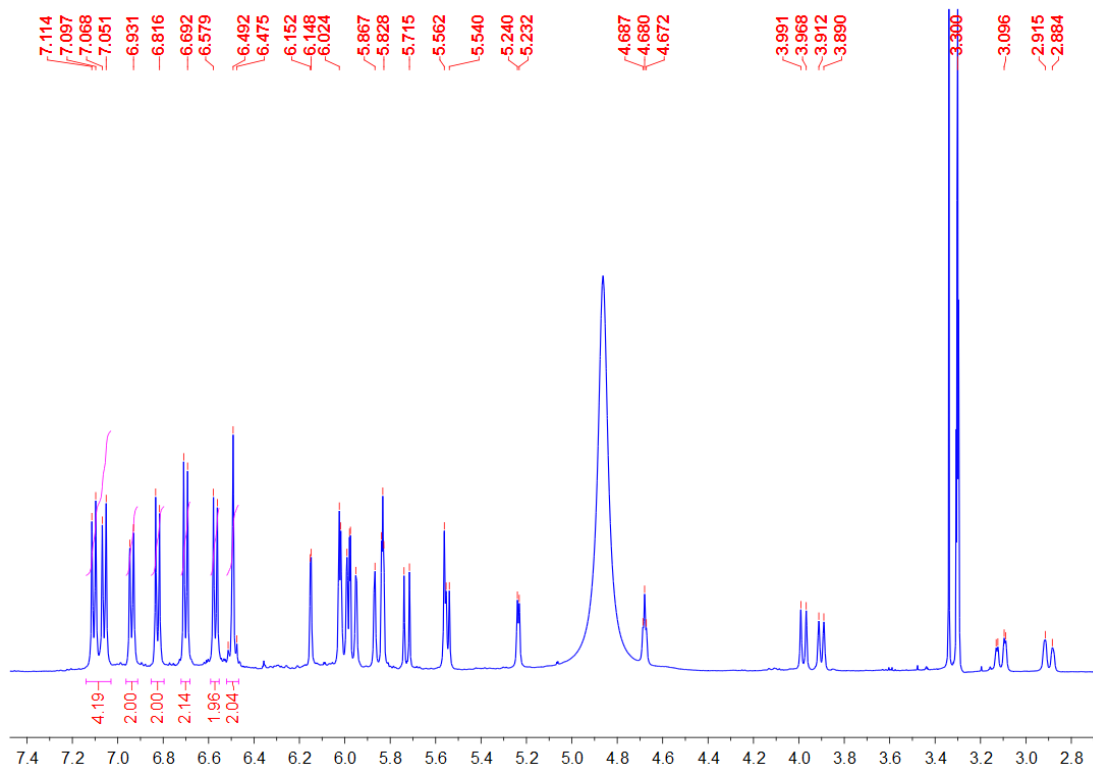

Figure S14. The  $^1\text{H}$ -NMR chromatography of compound 2

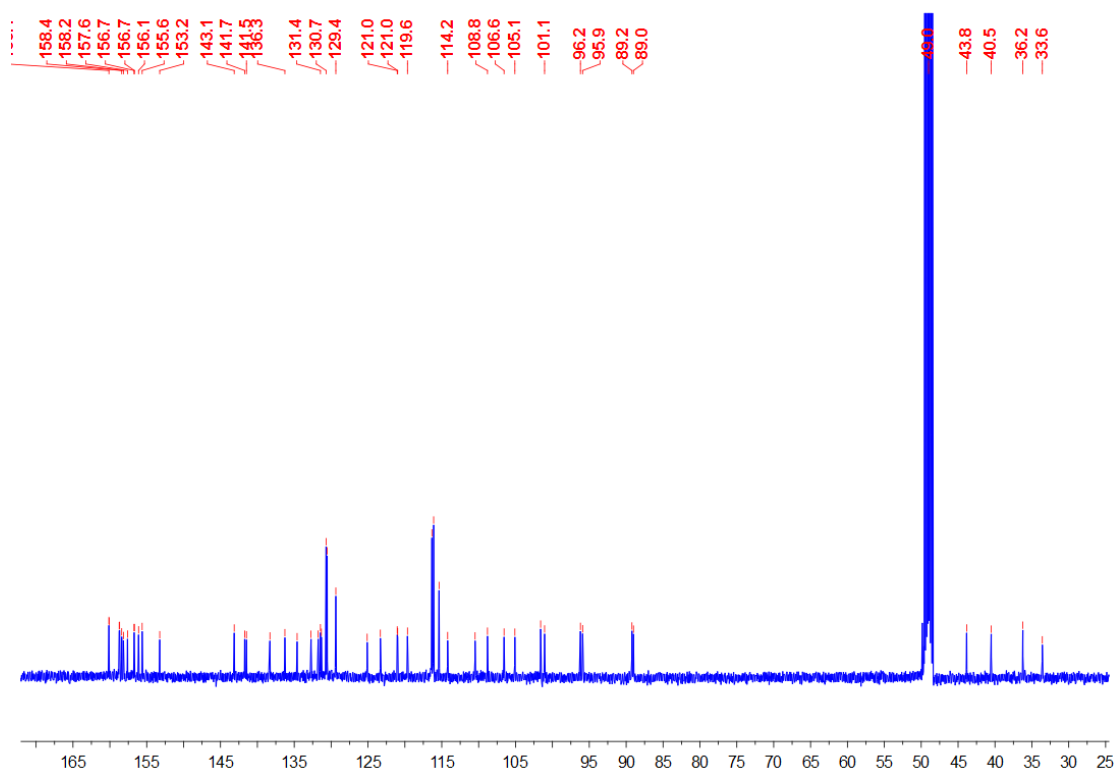

Figure S15. The  $^{13}\text{C}$ -NMR chromatography of compound 2

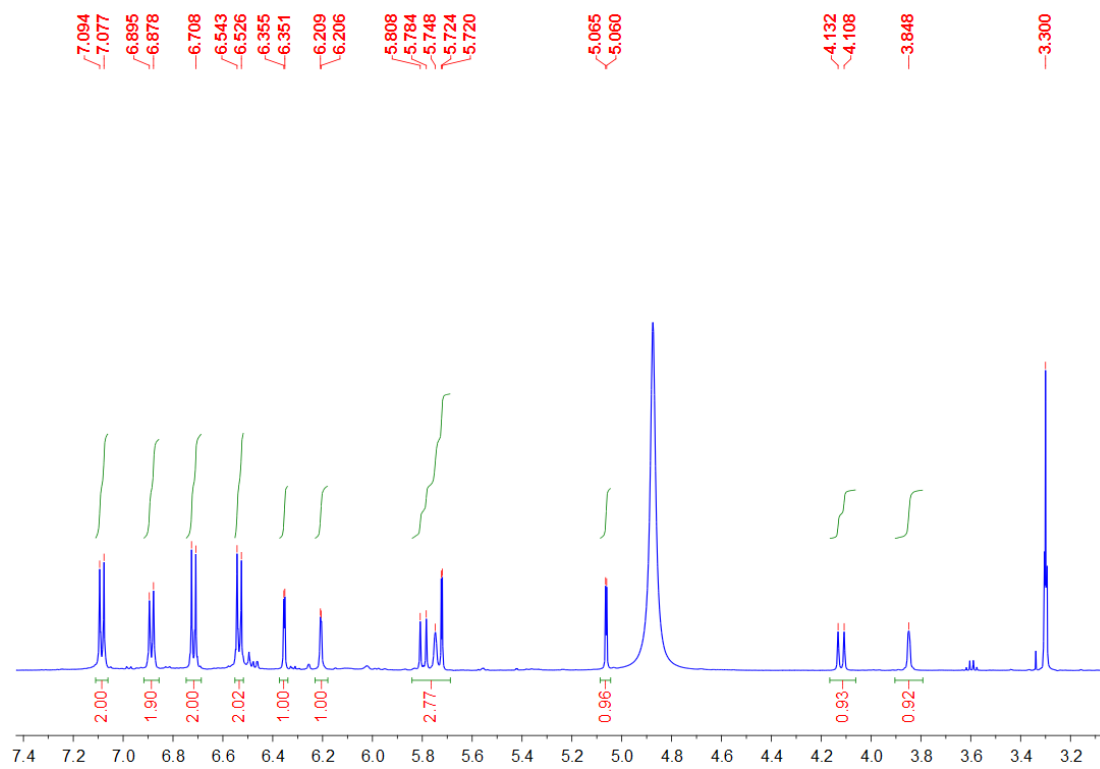

Figure S16. The  $^1\text{H}$ -NMR chromatography of compound 3

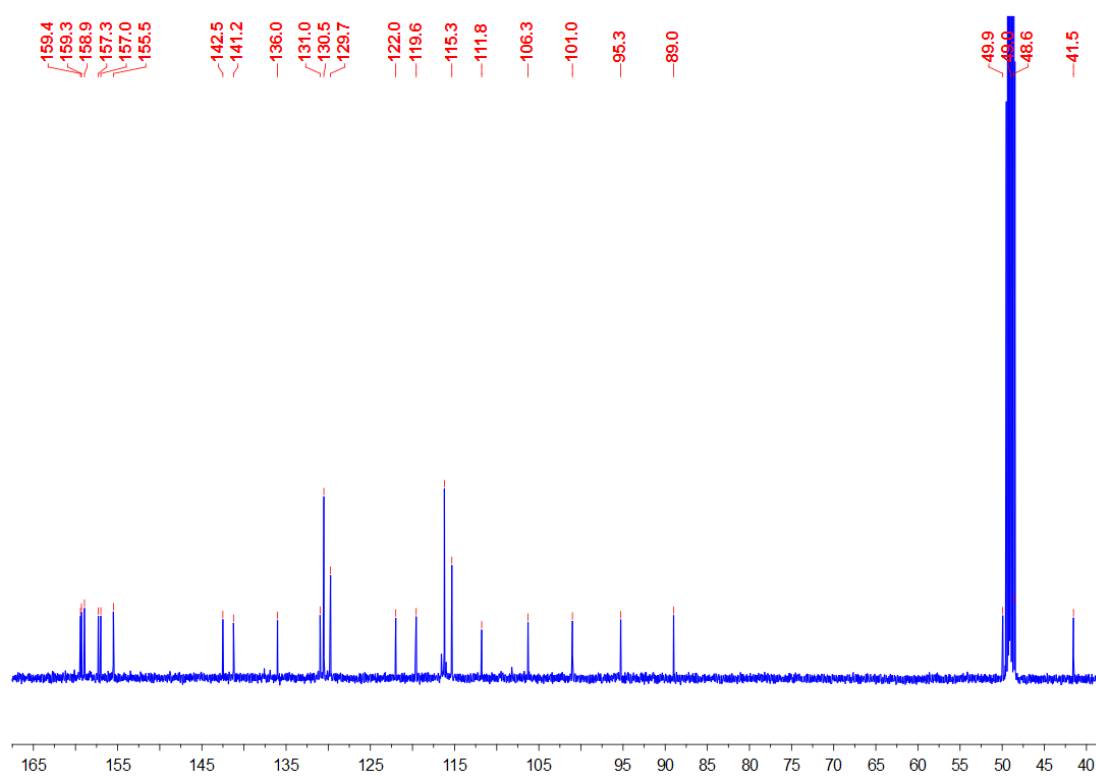

Figure S17. The  $^{13}\text{C}$ -NMR chromatography of compound 3



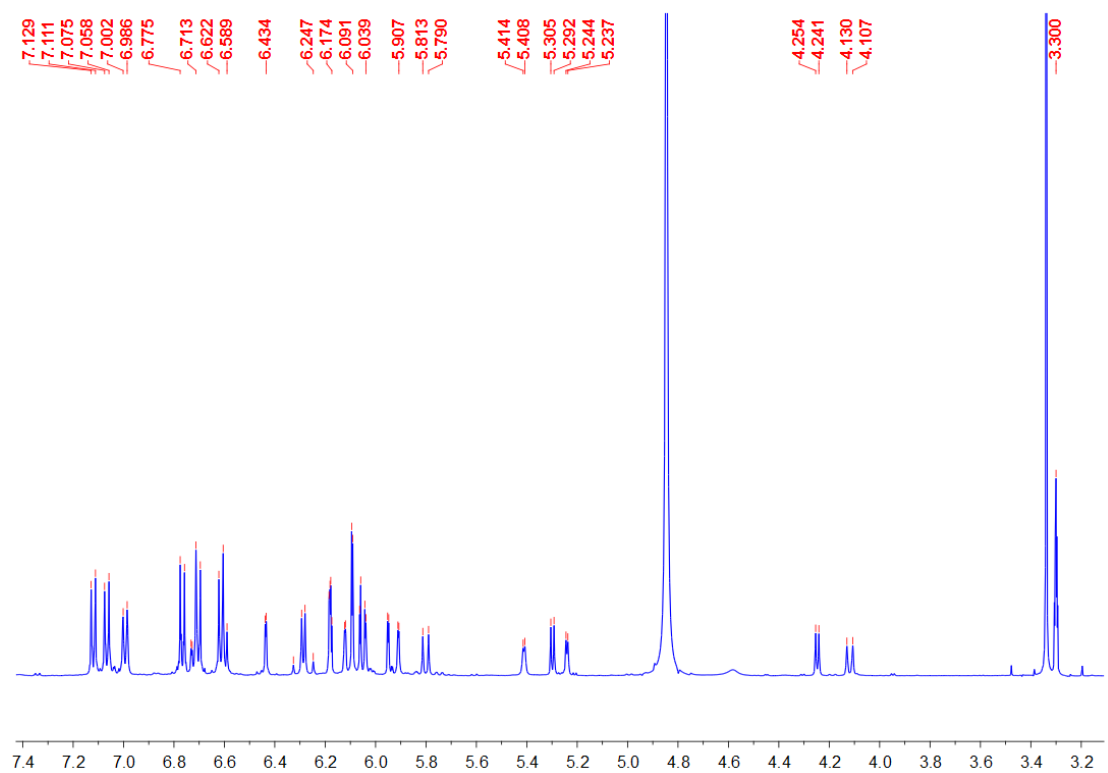

Figure S18. The  $^1\text{H-NMR}$  chromatography of compound 4

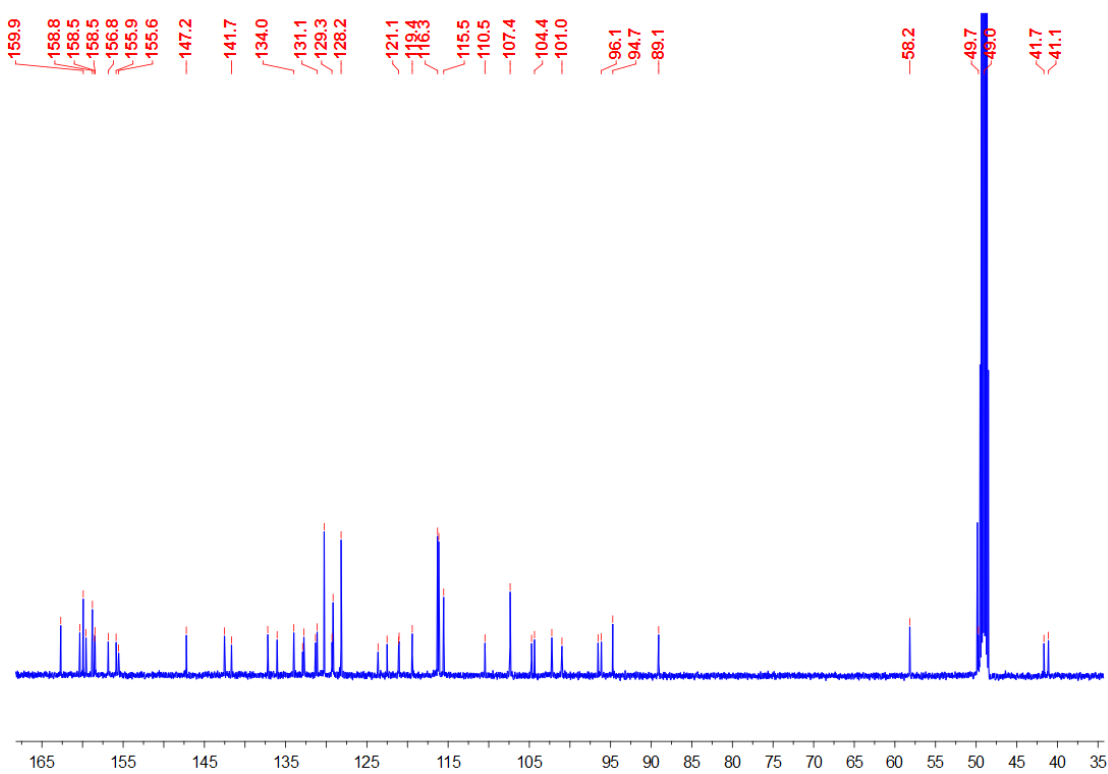

Figure S19. The  $^{13}\text{C-NMR}$  chromatography of compound 4

Table S1. The degree of the compounds and targets in the compound-target network.

| No. | Name   | Degree | No. | Name   | Degree | No. | Compound | Degree |
|-----|--------|--------|-----|--------|--------|-----|----------|--------|
| 1   | P12643 | 4      | 70  | P80188 | 4      | 1   | <b>2</b> | 123    |
| 2   | P00918 | 4      | 71  | O75469 | 4      | 2   | <b>4</b> | 122    |
| 3   | P02766 | 4      | 72  | P43403 | 4      | 3   | <b>1</b> | 117    |
| 4   | P02768 | 4      | 73  | P04150 | 4      | 4   | <b>3</b> | 108    |
| 5   | P55210 | 4      | 74  | Q04759 | 4      |     |          |        |
| 6   | P06276 | 4      | 75  | P06702 | 4      |     |          |        |
| 7   | P28482 | 4      | 76  | P08473 | 4      |     |          |        |
| 8   | P48736 | 4      | 77  | P07900 | 4      |     |          |        |
| 9   | P02774 | 4      | 78  | P11362 | 4      |     |          |        |
| 10  | P45452 | 4      | 79  | P60568 | 4      |     |          |        |
| 11  | P00742 | 4      | 80  | P43235 | 4      |     |          |        |
| 12  | P42768 | 4      | 81  | P11473 | 4      |     |          |        |
| 13  | P00734 | 4      | 82  | P23946 | 4      |     |          |        |
| 14  | P37231 | 4      | 83  | P15056 | 4      |     |          |        |
| 15  | P45983 | 4      | 84  | Q02763 | 4      |     |          |        |
| 16  | P10275 | 4      | 85  | Q13231 | 4      |     |          |        |
| 17  | P04278 | 4      | 86  | Q03181 | 4      |     |          |        |
| 18  | P12931 | 4      | 87  | P09960 | 4      |     |          |        |
| 19  | P42574 | 4      | 88  | P09601 | 4      |     |          |        |
| 20  | Q06124 | 4      | 89  | P25774 | 4      |     |          |        |
| 21  | P15090 | 4      | 90  | P98170 | 4      |     |          |        |
| 22  | O15496 | 4      | 91  | P08311 | 4      |     |          |        |
| 23  | P78536 | 4      | 92  | P10721 | 4      |     |          |        |
| 24  | P29474 | 4      | 93  | P07858 | 4      |     |          |        |
| 25  | P49841 | 4      | 94  | P61812 | 4      |     |          |        |
| 26  | P28845 | 4      | 95  | P11511 | 3      |     |          |        |
| 27  | Q08499 | 4      | 96  | P06126 | 3      |     |          |        |
| 28  | Q16539 | 4      | 97  | P00749 | 3      |     |          |        |
| 29  | Q07343 | 4      | 98  | Q92731 | 3      |     |          |        |
| 30  | P08235 | 4      | 99  | P54577 | 3      |     |          |        |
| 31  | P03372 | 4      | 100 | Q9UM07 | 3      |     |          |        |
| 32  | P35398 | 4      | 101 | P12821 | 3      |     |          |        |
| 33  | P15559 | 4      | 102 | P14780 | 3      |     |          |        |
| 34  | P08758 | 4      | 103 | P29466 | 3      |     |          |        |
| 35  | P00533 | 4      | 104 | O60674 | 3      |     |          |        |
| 36  | P04035 | 4      | 105 | P31749 | 3      |     |          |        |
| 37  | P08581 | 4      | 106 | P11474 | 3      |     |          |        |
| 38  | P36897 | 4      | 107 | P05230 | 2      |     |          |        |
| 39  | P10632 | 4      | 108 | Q07817 | 2      |     |          |        |
| 40  | P01009 | 4      | 109 | P14210 | 2      |     |          |        |
| 41  | P21802 | 4      | 110 | P24752 | 2      |     |          |        |

---

|    |        |   |     |        |   |
|----|--------|---|-----|--------|---|
| 42 | P14555 | 4 | 111 | P35520 | 2 |
| 43 | P49763 | 4 | 112 | P27986 | 2 |
| 44 | P09211 | 4 | 113 | P09488 | 2 |
| 45 | P35968 | 4 | 114 | P05089 | 2 |
| 46 | P20701 | 4 | 115 | Q9UNN8 | 2 |
| 47 | P27487 | 4 | 116 | Q03518 | 2 |
| 48 | Q01469 | 4 | 117 | Q06187 | 2 |
| 49 | P22894 | 4 | 118 | P63000 | 2 |
| 50 | P02753 | 4 | 119 | P00751 | 2 |
| 51 | P39900 | 4 | 120 | P13598 | 2 |
| 52 | Q08881 | 4 | 121 | Q9NP99 | 2 |
| 53 | P06239 | 4 | 122 | P14174 | 2 |
| 54 | P52333 | 4 | 123 | P00736 | 2 |
| 55 | Q96RI1 | 4 | 124 | O00244 | 2 |
| 56 | Q07869 | 4 | 125 | P15153 | 2 |
| 57 | P00797 | 4 | 126 | P68400 | 2 |
| 58 | Q13133 | 4 | 127 | P61586 | 2 |
| 59 | P55055 | 4 | 128 | P16109 | 2 |
| 60 | P50135 | 4 | 129 | P09871 | 2 |
| 61 | P08254 | 4 | 130 | P12724 | 2 |
| 62 | P11712 | 4 | 131 | P13501 | 2 |
| 63 | P43405 | 4 | 132 | P35228 | 2 |
| 64 | P08253 | 4 | 133 | P78540 | 1 |
| 65 | P09874 | 4 | 134 | P17931 | 1 |
| 66 | P04179 | 4 | 135 | Q9Y5Y6 | 1 |
| 67 | P00374 | 4 | 136 | P09237 | 1 |
| 68 | P08709 | 4 | 137 | P42224 | 1 |
| 69 | P08246 | 4 | 138 | P09486 | 1 |

---

Table S2. Result of KEGG enrichment analysis

| No. | ID       | Description                                          | LogP         |
|-----|----------|------------------------------------------------------|--------------|
| 1   | hsa05200 | Pathways in cancer                                   | -39.38648017 |
| 2   | hsa04014 | Ras signaling pathway                                | -22.04012741 |
| 3   | hsa04015 | Rap1 signaling pathway                               | -20.08348863 |
| 4   | hsa04151 | PI3K-Akt signaling pathway                           | -19.29281724 |
| 5   | hsa04010 | MAPK signaling pathway                               | -17.17914784 |
| 6   | hsa04020 | Calcium signaling pathway                            | -5.76592454  |
| 7   | hsa05417 | Lipid and atherosclerosis                            | -25.77632691 |
| 8   | hsa04657 | IL-17 signaling pathway                              | -12.21813636 |
| 9   | hsa05133 | Pertussis                                            | -11.67623147 |
| 10  | hsa04668 | TNF signaling pathway                                | -9.963617162 |
| 11  | hsa05130 | Pathogenic Escherichia coli infection                | -8.715640126 |
| 12  | hsa05132 | Salmonella infection                                 | -7.657710736 |
| 13  | hsa05010 | Alzheimer disease                                    | -6.662116425 |
| 14  | hsa04215 | Apoptosis - multiple species                         | -6.471241779 |
| 15  | hsa05022 | Pathways of neurodegeneration - multiple diseases    | -4.896432483 |
| 16  | hsa05134 | Legionellosis                                        | -2.641828902 |
| 17  | hsa05014 | Amyotrophic lateral sclerosis                        | -2.174651062 |
| 18  | hsa05205 | Proteoglycans in cancer                              | -20.29489101 |
| 19  | hsa05215 | Prostate cancer                                      | -16.74820967 |
| 20  | hsa01521 | EGFR tyrosine kinase inhibitor resistance            | -16.36239205 |
| 21  | hsa05135 | Yersinia infection                                   | -16.05659485 |
| 22  | hsa05210 | Colorectal cancer                                    | -15.85589428 |
| 23  | hsa04062 | Chemokine signaling pathway                          | -15.1911414  |
| 24  | hsa04380 | Osteoclast differentiation                           | -15.0063179  |
| 25  | hsa04933 | AGE-RAGE signaling pathway in diabetic complications | -14.96713898 |
| 26  | hsa05212 | Pancreatic cancer                                    | -14.90962327 |
| 27  | hsa04510 | Focal adhesion                                       | -14.87493592 |
| 28  | hsa05225 | Hepatocellular carcinoma                             | -14.71374731 |
| 29  | hsa05208 | Chemical carcinogenesis - reactive oxygen species    | -14.16283536 |
| 30  | hsa04917 | Prolactin signaling pathway                          | -13.68174332 |
| 31  | hsa05161 | Hepatitis B                                          | -13.56167908 |
| 32  | hsa04625 | C-type lectin receptor signaling pathway             | -13.21057158 |
| 33  | hsa04660 | T cell receptor signaling pathway                    | -13.21057158 |
| 34  | hsa04613 | Neutrophil extracellular trap formation              | -12.60123784 |
| 35  | hsa05142 | Chagas disease                                       | -11.81988751 |
| 36  | hsa04210 | Apoptosis                                            | -11.79679189 |
| 37  | hsa05226 | Gastric cancer                                       | -11.32339453 |
| 38  | hsa05167 | Kaposi sarcoma-associated herpesvirus infection      | -11.20789014 |
| 39  | hsa04370 | VEGF signaling pathway                               | -11.1605345  |

|    |          |                                                          |              |
|----|----------|----------------------------------------------------------|--------------|
| 40 | hsa05131 | Shigellosis                                              | -11.05126911 |
| 41 | hsa04664 | Fc epsilon RI signaling pathway                          | -10.58210184 |
| 42 | hsa05211 | Renal cell carcinoma                                     | -10.52307645 |
| 43 | hsa05166 | Human T-cell leukemia virus 1 infection                  | -10.47071433 |
| 44 | hsa05163 | Human cytomegalovirus infection                          | -10.39784676 |
| 45 | hsa05218 | Melanoma                                                 | -10.35146691 |
| 46 | hsa05224 | Breast cancer                                            | -10.07338514 |
| 47 | hsa05169 | Epstein-Barr virus infection                             | -9.77351741  |
| 48 | hsa04722 | Neurotrophin signaling pathway                           | -9.701200213 |
| 49 | hsa04068 | FoxO signaling pathway                                   | -9.288222794 |
| 50 | hsa05162 | Measles                                                  | -9.035188724 |
| 51 | hsa05230 | Central carbon metabolism in cancer                      | -8.938361775 |
| 52 | hsa04620 | Toll-like receptor signaling pathway                     | -8.896036856 |
| 53 | hsa05223 | Non-small cell lung cancer                               | -8.838618419 |
| 54 | hsa01524 | Platinum drug resistance                                 | -8.789872347 |
| 55 | hsa05220 | Chronic myeloid leukemia                                 | -8.647883511 |
| 56 | hsa05160 | Hepatitis C                                              | -8.519670014 |
| 57 | hsa04662 | B cell receptor signaling pathway                        | -8.381354032 |
| 58 | hsa04071 | Sphingolipid signaling pathway                           | -8.374513092 |
| 59 | hsa04012 | ErbB signaling pathway                                   | -8.255932461 |
| 60 | hsa04024 | cAMP signaling pathway                                   | -8.193115102 |
| 61 | hsa05231 | Choline metabolism in cancer                             | -7.763002637 |
| 62 | hsa04550 | Signaling pathways regulating pluripotency of stem cells | -7.673459679 |
| 63 | hsa05170 | Human immunodeficiency virus 1 infection                 | -7.274022307 |
| 64 | hsa04630 | JAK-STAT signaling pathway                               | -7.204271914 |
| 65 | hsa04935 | Growth hormone synthesis, secretion and action           | -7.1003686   |
| 66 | hsa05213 | Endometrial cancer                                       | -6.56571319  |
| 67 | hsa04666 | Fc gamma R-mediated phagocytosis                         | -6.487231785 |
| 68 | hsa04914 | Progesterone-mediated oocyte maturation                  | -6.337847294 |
| 69 | hsa05020 | Prion disease                                            | -6.256800418 |
| 70 | hsa05221 | Acute myeloid leukemia                                   | -6.188424872 |
| 71 | hsa05164 | Influenza A                                              | -5.894907367 |
| 72 | hsa04919 | Thyroid hormone signaling pathway                        | -5.83521409  |
| 73 | hsa04140 | Autophagy - animal                                       | -5.392017912 |
| 74 | hsa05222 | Small cell lung cancer                                   | -5.375014846 |
| 75 | hsa05168 | Herpes simplex virus 1 infection                         | -4.739367421 |
| 76 | hsa05214 | Glioma                                                   | -4.606640009 |
| 77 | hsa04910 | Insulin signaling pathway                                | -4.386308652 |
| 78 | hsa04150 | mTOR signaling pathway                                   | -4.072688682 |
| 79 | hsa04218 | Cellular senescence                                      | -4.072688682 |
| 80 | hsa04725 | Cholinergic synapse                                      | -3.75666373  |
| 81 | hsa04929 | GnRH secretion                                           | -3.668664214 |
| 82 | hsa04960 | Aldosterone-regulated sodium reabsorption                | -3.188764589 |

|     |          |                                                            |              |
|-----|----------|------------------------------------------------------------|--------------|
| 83  | hsa04211 | Longevity regulating pathway                               | -3.122282021 |
| 84  | hsa05165 | Human papillomavirus infection                             | -3.071000788 |
| 85  | hsa04930 | Type II diabetes mellitus                                  | -2.910941679 |
| 86  | hsa04923 | Regulation of lipolysis in adipocytes                      | -2.663866989 |
| 87  | hsa04152 | AMPK signaling pathway                                     | -2.642648247 |
| 88  | hsa04213 | Longevity regulating pathway - multiple species            | -2.537592175 |
| 89  | hsa05017 | Spinocerebellar ataxia                                     | -2.369414538 |
| 90  | hsa04934 | Cushing syndrome                                           | -2.246183801 |
| 91  | hsa05418 | Fluid shear stress and atherosclerosis                     | -18.98974721 |
| 92  | hsa05415 | Diabetic cardiomyopathy                                    | -16.15568796 |
| 93  | hsa04670 | Leukocyte transendothelial migration                       | -9.886857966 |
| 94  | hsa05171 | Coronavirus disease - COVID-19                             | -15.17945733 |
| 95  | hsa04659 | Th17 cell differentiation                                  | -14.51872172 |
| 96  | hsa05235 | PD-L1 expression and PD-1 checkpoint pathway in cancer     | -14.04766115 |
| 97  | hsa05152 | Tuberculosis                                               | -12.92540283 |
| 98  | hsa05145 | Toxoplasmosis                                              | -12.81656913 |
| 99  | hsa04658 | Th1 and Th2 cell differentiation                           | -10.82487539 |
| 100 | hsa04621 | NOD-like receptor signaling pathway                        | -9.028844865 |
| 101 | hsa04217 | Necroptosis                                                | -6.133314986 |
| 102 | hsa05140 | Leishmaniasis                                              | -5.828866894 |
| 103 | hsa04520 | Adherens junction                                          | -13.61031462 |
| 104 | hsa04810 | Regulation of actin cytoskeleton                           | -10.56957245 |
| 105 | hsa04360 | Axon guidance                                              | -6.771702393 |
| 106 | hsa05203 | Viral carcinogenesis                                       | -5.324761659 |
| 107 | hsa05100 | Bacterial invasion of epithelial cells                     | -4.551102765 |
| 108 | hsa04530 | Tight junction                                             | -3.881845422 |
| 109 | hsa04144 | Endocytosis                                                | -2.219205566 |
| 110 | hsa01522 | Endocrine resistance                                       | -13.52846935 |
| 111 | hsa04926 | Relaxin signaling pathway                                  | -13.49574553 |
| 112 | hsa05207 | Chemical carcinogenesis - receptor activation              | -11.94927403 |
| 113 | hsa04915 | Estrogen signaling pathway                                 | -10.37124712 |
| 114 | hsa05219 | Bladder cancer                                             | -7.492381392 |
| 115 | hsa04912 | GnRH signaling pathway                                     | -5.347674365 |
| 116 | hsa04921 | Oxytocin signaling pathway                                 | -4.103632737 |
| 117 | hsa04540 | Gap junction                                               | -2.11233501  |
| 118 | hsa05120 | Epithelial cell signaling in Helicobacter pylori infection | -12.04749033 |
| 119 | hsa04750 | Inflammatory mediator regulation of TRP channels           | -4.048220287 |
| 120 | hsa04137 | Mitophagy - animal                                         | -3.471627169 |
| 121 | hsa04650 | Natural killer cell mediated cytotoxicity                  | -11.99215173 |
| 122 | hsa05416 | Viral myocarditis                                          | -3.777465917 |
| 123 | hsa04611 | Platelet activation                                        | -10.87943496 |
| 124 | hsa04072 | Phospholipase D signaling pathway                          | -8.768860987 |

|     |          |                                                     |              |
|-----|----------|-----------------------------------------------------|--------------|
| 125 | hsa04066 | HIF-1 signaling pathway                             | -7.3985211   |
| 126 | hsa04371 | Apelin signaling pathway                            | -4.351078329 |
| 127 | hsa04022 | cGMP-PKG signaling pathway                          | -2.981040543 |
| 128 | hsa04261 | Adrenergic signaling in cardiomyocytes              | -2.296141321 |
| 129 | hsa04064 | NF-kappa B signaling pathway                        | -10.28631625 |
| 130 | hsa05340 | Primary immunodeficiency                            | -6.084156723 |
| 131 | hsa04931 | Insulin resistance                                  | -10.12171346 |
| 132 | hsa04932 | Non-alcoholic fatty liver disease                   | -9.82485916  |
| 133 | hsa04920 | Adipocytokine signaling pathway                     | -6.112049883 |
| 134 | hsa04936 | Alcoholic liver disease                             | -4.299276582 |
| 135 | hsa04728 | Dopaminergic synapse                                | -2.493310636 |
| 136 | hsa04610 | Complement and coagulation cascades                 | -9.688587929 |
| 137 | hsa05150 | Staphylococcus aureus infection                     | -4.090776771 |
| 138 | hsa05322 | Systemic lupus erythematosus                        | -2.446934511 |
| 139 | hsa04928 | Parathyroid hormone synthesis, secretion and action | -8.821928227 |
| 140 | hsa05146 | Amoebiasis                                          | -7.62553578  |
| 141 | hsa00220 | Arginine biosynthesis                               | -5.542914711 |
| 142 | hsa00330 | Arginine and proline metabolism                     | -4.05398091  |
| 143 | hsa01230 | Biosynthesis of amino acids                         | -2.304560478 |
| 144 | hsa04614 | Renin-angiotensin system                            | -7.233927615 |
| 145 | hsa04924 | Renin secretion                                     | -2.406113959 |
| 146 | hsa05206 | MicroRNAs in cancer                                 | -6.693951516 |
| 147 | hsa04310 | Wnt signaling pathway                               | -5.972260602 |
| 148 | hsa03320 | PPAR signaling pathway                              | -5.896565452 |
| 149 | hsa05144 | Malaria                                             | -5.477836204 |
| 150 | hsa05323 | Rheumatoid arthritis                                | -5.347674365 |
| 151 | hsa00590 | Arachidonic acid metabolism                         | -5.046962281 |
| 152 | hsa00591 | Linoleic acid metabolism                            | -5.0422319   |
| 153 | hsa04270 | Vascular smooth muscle contraction                  | -4.440239837 |
| 154 | hsa04972 | Pancreatic secretion                                | -3.965897427 |
| 155 | hsa04975 | Fat digestion and absorption                        | -2.996523184 |
| 156 | hsa05204 | Chemical carcinogenesis - DNA adducts               | -4.783424718 |
| 157 | hsa00982 | Drug metabolism - cytochrome P450                   | -3.471627169 |
| 158 | hsa00980 | Metabolism of xenobiotics by cytochrome P450        | -3.338890684 |
| 159 | hsa05202 | Transcriptional misregulation in cancer             | -4.505168893 |
| 160 | hsa04350 | TGF-beta signaling pathway                          | -4.134316611 |
| 161 | hsa04390 | Hippo signaling pathway                             | -3.101051963 |
| 162 | hsa04726 | Serotonergic synapse                                | -3.721046073 |
| 163 | hsa05216 | Thyroid cancer                                      | -3.188764589 |
| 164 | hsa05321 | Inflammatory bowel disease                          | -3.642613753 |
| 165 | hsa04612 | Antigen processing and presentation                 | -3.338890684 |
| 166 | hsa04142 | Lysosome                                            | -2.493310636 |
| 167 | hsa04145 | Phagosome                                           | -2.275929828 |

|     |          |                    |              |
|-----|----------|--------------------|--------------|
| 168 | hsa04978 | Mineral absorption | -2.578150419 |
| 169 | hsa04976 | Bile secretion     | -2.098876582 |

Table S3. Result of GO enrichment analysis

Biological Process

| ID         | Description                                                | LogP         |
|------------|------------------------------------------------------------|--------------|
| GO:0009725 | response to hormone                                        | -30.61415109 |
| GO:0071396 | cellular response to lipid                                 | -27.97422208 |
| GO:0032870 | cellular response to hormone stimulus                      | -22.22513717 |
| GO:0071407 | cellular response to organic cyclic compound               | -20.45864386 |
| GO:0030522 | intracellular receptor signaling pathway                   | -20.32313914 |
| GO:0009755 | hormone-mediated signaling pathway                         | -16.5619981  |
| GO:0048545 | response to steroid hormone                                | -15.16280867 |
| GO:0043401 | steroid hormone mediated signaling pathway                 | -13.47073761 |
| GO:0071383 | cellular response to steroid hormone stimulus              | -12.79273257 |
| GO:0030518 | intracellular steroid hormone receptor signaling pathway   | -9.937473371 |
| GO:0031347 | regulation of defense response                             | -30.24042097 |
| GO:0050727 | regulation of inflammatory response                        | -28.44524614 |
| GO:0032102 | negative regulation of response to external stimulus       | -19.85341502 |
| GO:0031348 | negative regulation of defense response                    | -17.93765725 |
| GO:0050728 | negative regulation of inflammatory response               | -15.52393472 |
| GO:0001959 | regulation of cytokine-mediated signaling pathway          | -12.07187815 |
| GO:0060759 | regulation of response to cytokine stimulus                | -11.68347148 |
| GO:0001960 | negative regulation of cytokine-mediated signaling pathway | -9.551316374 |
| GO:0060761 | negative regulation of response to cytokine stimulus       | -9.333478224 |
| GO:0002831 | regulation of response to biotic stimulus                  | -8.976431021 |
| GO:0045088 | regulation of innate immune response                       | -7.897490632 |
| GO:0030335 | positive regulation of cell migration                      | -29.00950329 |
| GO:2000147 | positive regulation of cell motility                       | -28.38709217 |
| GO:0051272 | positive regulation of cellular component movement         | -28.0615005  |
| GO:0040017 | positive regulation of locomotion                          | -28.01209727 |
| GO:0035239 | tube morphogenesis                                         | -16.39136709 |
| GO:0050678 | regulation of epithelial cell proliferation                | -16.1472847  |
| GO:0010634 | positive regulation of epithelial cell migration           | -14.48522115 |
| GO:0070848 | response to growth factor                                  | -13.86000188 |
| GO:0010632 | regulation of epithelial cell migration                    | -13.57478814 |
| GO:0071363 | cellular response to growth factor stimulus                | -13.31715135 |
| GO:0050679 | positive regulation of epithelial cell proliferation       | -13.27283202 |
| GO:0010595 | positive regulation of endothelial cell migration          | -11.99215173 |



|            |                                                                  |              |
|------------|------------------------------------------------------------------|--------------|
| GO:0001936 | regulation of endothelial cell proliferation                     | -11.68347148 |
| GO:0010594 | regulation of endothelial cell migration                         | -11.468685   |
| GO:0001525 | angiogenesis                                                     | -10.57766692 |
| GO:0001938 | positive regulation of endothelial cell proliferation            | -10.00255824 |
| GO:0048514 | blood vessel morphogenesis                                       | -9.962702849 |
| GO:0001568 | blood vessel development                                         | -9.746947717 |
| GO:0001944 | vasculature development                                          | -9.476287431 |
| GO:0045765 | regulation of angiogenesis                                       | -7.136120043 |
| GO:1901342 | regulation of vasculature development                            | -7.055419378 |
| GO:0043535 | regulation of blood vessel endothelial cell migration            | -6.32556126  |
| GO:0043536 | positive regulation of blood vessel endothelial cell migration   | -5.896565452 |
| GO:0045766 | positive regulation of angiogenesis                              | -5.656736283 |
| GO:1904018 | positive regulation of vasculature development                   | -5.656736283 |
| GO:0009611 | response to wounding                                             | -28.66849709 |
| GO:0042060 | wound healing                                                    | -23.96840122 |
| GO:0050878 | regulation of body fluid levels                                  | -14.06987454 |
| GO:0007596 | blood coagulation                                                | -13.19921058 |
| GO:0050817 | coagulation                                                      | -13.12947612 |
| GO:0007599 | hemostasis                                                       | -13.02649646 |
| GO:0030168 | platelet activation                                              | -6.518113894 |
| GO:0009617 | response to bacterium                                            | -26.24787723 |
| GO:0032496 | response to lipopolysaccharide                                   | -25.77628589 |
| GO:0002237 | response to molecule of bacterial origin                         | -25.02771014 |
| GO:0071216 | cellular response to biotic stimulus                             | -20.34227405 |
| GO:0071222 | cellular response to lipopolysaccharide                          | -17.65187    |
| GO:0071219 | cellular response to molecule of bacterial origin                | -17.19616425 |
| GO:0007167 | enzyme-linked receptor protein signaling pathway                 | -25.37740259 |
| GO:0007169 | transmembrane receptor protein tyrosine kinase signaling pathway | -24.26556203 |
| GO:0006468 | protein phosphorylation                                          | -19.96953793 |
| GO:0048534 | hematopoietic or lymphoid organ development                      | -19.74140463 |
| GO:0002520 | immune system development                                        | -18.9732106  |
| GO:0030097 | hemopoiesis                                                      | -18.42692047 |
| GO:0018108 | peptidyl-tyrosine phosphorylation                                | -15.63506253 |
| GO:0018212 | peptidyl-tyrosine modification                                   | -15.50082505 |
| GO:0001775 | cell activation                                                  | -14.59057313 |
| GO:0046777 | protein autophosphorylation                                      | -14.01824325 |
| GO:0045321 | leukocyte activation                                             | -12.37737438 |
| GO:0002521 | leukocyte differentiation                                        | -12.09215781 |
| GO:0042110 | T cell activation                                                | -10.64244193 |
| GO:0046649 | lymphocyte activation                                            | -10.02359068 |
| GO:1903131 | mononuclear cell differentiation                                 | -8.949005199 |
| GO:0030217 | T cell differentiation                                           | -8.628440228 |

|            |                                                                   |              |
|------------|-------------------------------------------------------------------|--------------|
| GO:0030098 | lymphocyte differentiation                                        | -8.579435909 |
| GO:0042113 | B cell activation                                                 | -3.867856281 |
| GO:0030183 | B cell differentiation                                            | -3.634926326 |
| GO:0030155 | regulation of cell adhesion                                       | -22.93223024 |
| GO:0050865 | regulation of cell activation                                     | -19.8830662  |
| GO:0002694 | regulation of leukocyte activation                                | -17.58939832 |
| GO:1903037 | regulation of leukocyte cell-cell adhesion                        | -16.57051771 |
| GO:0022407 | regulation of cell-cell adhesion                                  | -16.42824304 |
| GO:0045785 | positive regulation of cell adhesion                              | -14.33523146 |
| GO:0050863 | regulation of T cell activation                                   | -14.219541   |
| GO:0071345 | cellular response to cytokine stimulus                            | -13.70634039 |
| GO:0070663 | regulation of leukocyte proliferation                             | -13.25358083 |
| GO:0007162 | negative regulation of cell adhesion                              | -13.21689815 |
| GO:0051249 | regulation of lymphocyte activation                               | -12.91507804 |
| GO:0022409 | positive regulation of cell-cell adhesion                         | -11.90776951 |
| GO:1903039 | positive regulation of leukocyte cell-cell adhesion               | -11.80215737 |
| GO:0050670 | regulation of lymphocyte proliferation                            | -11.44320582 |
| GO:0032944 | regulation of mononuclear cell proliferation                      | -11.36748866 |
| GO:0042129 | regulation of T cell proliferation                                | -10.49878848 |
| GO:0050867 | positive regulation of cell activation                            | -10.40237322 |
| GO:0050870 | positive regulation of T cell activation                          | -9.981955309 |
| GO:2000106 | regulation of leukocyte apoptotic process                         | -9.688587929 |
| GO:0070228 | regulation of lymphocyte apoptotic process                        | -9.673603132 |
| GO:0002696 | positive regulation of leukocyte activation                       | -9.667784501 |
| GO:0051251 | positive regulation of lymphocyte activation                      | -9.421425286 |
| GO:0070229 | negative regulation of lymphocyte apoptotic process               | -8.087850438 |
| GO:0070665 | positive regulation of leukocyte proliferation                    | -7.274208925 |
| GO:2000107 | negative regulation of leukocyte apoptotic process                | -6.958748065 |
| GO:0050671 | positive regulation of lymphocyte proliferation                   | -6.507428677 |
| GO:0032946 | positive regulation of mononuclear cell proliferation             | -6.460924539 |
| GO:0070232 | regulation of T cell apoptotic process                            | -6.333992384 |
| GO:0042102 | positive regulation of T cell proliferation                       | -6.280313163 |
| GO:0070233 | negative regulation of T cell apoptotic process                   | -5.718752183 |
| GO:0019221 | cytokine-mediated signaling pathway                               | -5.183423092 |
| GO:2000514 | regulation of CD4-positive, alpha-beta T cell activation          | -3.566996298 |
| GO:2000515 | negative regulation of CD4-positive, alpha-beta T cell activation | -3.417757237 |
| GO:0046636 | negative regulation of alpha-beta T cell activation               | -3.026484409 |
| GO:0032103 | positive regulation of response to external stimulus              | -22.8808739  |
| GO:0031349 | positive regulation of defense response                           | -12.07950528 |
| GO:0050729 | positive regulation of inflammatory response                      | -8.656119157 |
| GO:0048608 | reproductive structure development                                | -22.46910082 |
| GO:0061458 | reproductive system development                                   | -22.38826386 |

|            |                                                                 |              |
|------------|-----------------------------------------------------------------|--------------|
| GO:0007548 | sex differentiation                                             | -12.72240701 |
| GO:0008406 | gonad development                                               | -11.7303654  |
| GO:0045137 | development of primary sexual characteristics                   | -11.59793099 |
| GO:0046660 | female sex differentiation                                      | -9.774425465 |
| GO:0008585 | female gonad development                                        | -9.128026859 |
| GO:0046545 | development of primary female sexual characteristics            | -8.971712316 |
| GO:0022602 | ovulation cycle process                                         | -7.067738962 |
| GO:0001541 | ovarian follicle development                                    | -6.705781387 |
| GO:0008584 | male gonad development                                          | -6.651377823 |
| GO:0046546 | development of primary male sexual characteristics              | -6.626908074 |
| GO:0034405 | response to fluid shear stress                                  | -6.333992384 |
| GO:0046661 | male sex differentiation                                        | -6.1126988   |
| GO:0042698 | ovulation cycle                                                 | -6.112049883 |
| GO:0048771 | tissue remodeling                                               | -5.293941743 |
| GO:0048863 | stem cell differentiation                                       | -4.042186803 |
| GO:0007276 | gamete generation                                               | -2.153483435 |
| GO:0001934 | positive regulation of protein phosphorylation                  | -20.42059355 |
| GO:0001819 | positive regulation of cytokine production                      | -19.810826   |
| GO:0043549 | regulation of kinase activity                                   | -19.80775099 |
| GO:0043408 | regulation of MAPK cascade                                      | -19.16010247 |
| GO:0051347 | positive regulation of transferase activity                     | -17.89381664 |
| GO:0033674 | positive regulation of kinase activity                          | -17.31762786 |
| GO:0043410 | positive regulation of MAPK cascade                             | -17.25712509 |
| GO:0045859 | regulation of protein kinase activity                           | -14.40033004 |
| GO:0045860 | positive regulation of protein kinase activity                  | -12.22640589 |
| GO:0071900 | regulation of protein serine/threonine kinase activity          | -11.53464025 |
| GO:0043405 | regulation of MAP kinase activity                               | -11.5299948  |
| GO:0071902 | positive regulation of protein serine/threonine kinase activity | -10.42201666 |
| GO:0070372 | regulation of ERK1 and ERK2 cascade                             | -9.705209483 |
| GO:0070374 | positive regulation of ERK1 and ERK2 cascade                    | -9.324260724 |
| GO:0050731 | positive regulation of peptidyl-tyrosine phosphorylation        | -8.929948732 |
| GO:0050730 | regulation of peptidyl-tyrosine phosphorylation                 | -8.560430379 |
| GO:0043406 | positive regulation of MAP kinase activity                      | -8.472870371 |
| GO:0009410 | response to xenobiotic stimulus                                 | -19.30097994 |
| GO:0036293 | response to decreased oxygen levels                             | -17.29566579 |
| GO:0070482 | response to oxygen levels                                       | -16.56781487 |
| GO:0001666 | response to hypoxia                                             | -16.39733095 |
| GO:0010942 | positive regulation of cell death                               | -15.23603218 |
| GO:0043068 | positive regulation of programmed cell death                    | -13.12874643 |
| GO:0043065 | positive regulation of apoptotic process                        | -11.34069512 |
| GO:0048511 | rhythmic process                                                | -10.62063458 |
| GO:0022617 | extracellular matrix disassembly                                | -17.76091099 |
| GO:0030574 | collagen catabolic process                                      | -14.91767342 |

|            |                                                                                                                                                  |              |
|------------|--------------------------------------------------------------------------------------------------------------------------------------------------|--------------|
| GO:0032963 | collagen metabolic process                                                                                                                       | -14.63948025 |
| GO:0030198 | extracellular matrix organization                                                                                                                | -10.51293975 |
| GO:0043062 | extracellular structure organization                                                                                                             | -10.49166442 |
| GO:0045229 | external encapsulating structure organization                                                                                                    | -10.44937211 |
| GO:0022411 | cellular component disassembly                                                                                                                   | -8.931177664 |
| GO:1904645 | response to amyloid-beta                                                                                                                         | -8.219438111 |
| GO:0006935 | chemotaxis                                                                                                                                       | -16.980079   |
| GO:0042330 | taxis                                                                                                                                            | -16.94119533 |
| GO:0050900 | leukocyte migration                                                                                                                              | -15.2423965  |
| GO:0060326 | cell chemotaxis                                                                                                                                  | -9.650921305 |
| GO:0097529 | myeloid leukocyte migration                                                                                                                      | -9.489311998 |
| GO:0030595 | leukocyte chemotaxis                                                                                                                             | -8.855624789 |
| GO:0033628 | regulation of cell adhesion mediated by integrin                                                                                                 | -8.648182486 |
| GO:0030593 | neutrophil chemotaxis                                                                                                                            | -8.511866349 |
| GO:0071621 | granulocyte chemotaxis                                                                                                                           | -8.297197646 |
| GO:1990266 | neutrophil migration                                                                                                                             | -8.095990489 |
| GO:0097530 | granulocyte migration                                                                                                                            | -7.798323649 |
| GO:0033630 | positive regulation of cell adhesion mediated by integrin                                                                                        | -3.932113785 |
| GO:0002683 | negative regulation of immune system process                                                                                                     | -16.254587   |
| GO:0050777 | negative regulation of immune response                                                                                                           | -11.5299948  |
| GO:0050866 | negative regulation of cell activation                                                                                                           | -9.438241111 |
| GO:0022408 | negative regulation of cell-cell adhesion                                                                                                        | -8.66947871  |
| GO:0002695 | negative regulation of leukocyte activation                                                                                                      | -7.659334066 |
| GO:1903038 | negative regulation of leukocyte cell-cell adhesion                                                                                              | -7.647101957 |
| GO:0002700 | regulation of production of molecular mediator of immune response                                                                                | -7.090818429 |
| GO:0002718 | regulation of cytokine production involved in immune response                                                                                    | -6.456694159 |
| GO:0051250 | negative regulation of lymphocyte activation                                                                                                     | -6.092224523 |
| GO:0050868 | negative regulation of T cell activation                                                                                                         | -5.740423278 |
| GO:0070664 | negative regulation of leukocyte proliferation                                                                                                   | -5.402680918 |
| GO:0002719 | negative regulation of cytokine production involved in immune response                                                                           | -5.170556276 |
| GO:0002698 | negative regulation of immune effector process                                                                                                   | -4.881757815 |
| GO:0002701 | negative regulation of production of molecular mediator of immune response                                                                       | -4.563621458 |
| GO:0050672 | negative regulation of lymphocyte proliferation                                                                                                  | -4.368389267 |
| GO:0032945 | negative regulation of mononuclear cell proliferation                                                                                            | -4.343647301 |
| GO:0046006 | regulation of activated T cell proliferation                                                                                                     | -4.231385806 |
| GO:0002823 | negative regulation of adaptive immune response based on somatic recombination of immune receptors built from immunoglobulin superfamily domains | -2.709251562 |
| GO:0002820 | negative regulation of adaptive immune response                                                                                                  | -2.598984718 |

|            |                                                                                 |              |
|------------|---------------------------------------------------------------------------------|--------------|
| GO:0002704 | negative regulation of leukocyte mediated immunity                              | -2.442135686 |
| GO:0042130 | negative regulation of T cell proliferation                                     | -2.423979776 |
| GO:0010817 | regulation of hormone levels                                                    | -16.02162897 |
| GO:0042445 | hormone metabolic process                                                       | -13.61758849 |
| GO:0000302 | response to reactive oxygen species                                             | -15.99652924 |
| GO:0006979 | response to oxidative stress                                                    | -14.19796632 |
| GO:0062197 | cellular response to chemical stress                                            | -14.16505199 |
| GO:0010035 | response to inorganic substance                                                 | -13.47737931 |
| GO:0034599 | cellular response to oxidative stress                                           | -13.00511939 |
| GO:0034614 | cellular response to reactive oxygen species                                    | -12.54071619 |
| GO:0046686 | response to cadmium ion                                                         | -11.1605345  |
| GO:0010038 | response to metal ion                                                           | -10.0712723  |
| GO:0071241 | cellular response to inorganic substance                                        | -8.213609384 |
| GO:0071276 | cellular response to cadmium ion                                                | -7.772351068 |
| GO:0071248 | cellular response to metal ion                                                  | -7.723996604 |
| GO:0006954 | inflammatory response                                                           | -15.56171256 |
| GO:0051090 | regulation of DNA-binding transcription factor activity                         | -9.511982904 |
| GO:0051091 | positive regulation of DNA-binding transcription factor activity                | -7.381102715 |
| GO:0016485 | protein processing                                                              | -15.33690367 |
| GO:0051604 | protein maturation                                                              | -13.20096053 |
| GO:0008015 | blood circulation                                                               | -12.28023701 |
| GO:0003013 | circulatory system process                                                      | -11.81213653 |
| GO:0008217 | regulation of blood pressure                                                    | -11.3226546  |
| GO:0140448 | signaling receptor ligand precursor processing                                  | -11.27175812 |
| GO:0003044 | regulation of systemic arterial blood pressure mediated by a chemical signal    | -10.53819703 |
| GO:0003073 | regulation of systemic arterial blood pressure                                  | -9.24988813  |
| GO:0001990 | regulation of systemic arterial blood pressure by hormone                       | -7.925116092 |
| GO:0016486 | peptide hormone processing                                                      | -7.925116092 |
| GO:0043603 | cellular amide metabolic process                                                | -7.615024831 |
| GO:0003081 | regulation of systemic arterial blood pressure by renin-angiotensin             | -7.449166496 |
| GO:0002002 | regulation of angiotensin levels in blood                                       | -7.28670494  |
| GO:0002003 | angiotensin maturation                                                          | -7.28670494  |
| GO:0050886 | endocrine process                                                               | -7.012638408 |
| GO:0001991 | regulation of systemic arterial blood pressure by circulatory renin-angiotensin | -6.538943171 |
| GO:0006518 | peptide metabolic process                                                       | -5.992728233 |
| GO:0050435 | amyloid-beta metabolic process                                                  | -4.066733811 |
| GO:0009991 | response to extracellular stimulus                                              | -15.27808387 |
| GO:0031667 | response to nutrient levels                                                     | -14.80315541 |
| GO:0007584 | response to nutrient                                                            | -10.17040996 |

|            |                                                                                         |              |
|------------|-----------------------------------------------------------------------------------------|--------------|
| GO:0033273 | response to vitamin                                                                     | -5.828866894 |
| GO:2001233 | regulation of apoptotic signaling pathway                                               | -15.24603219 |
| GO:2001234 | negative regulation of apoptotic signaling pathway                                      | -12.6937992  |
| GO:2001237 | negative regulation of extrinsic apoptotic signaling pathway                            | -12.06460194 |
| GO:2001236 | regulation of extrinsic apoptotic signaling pathway                                     | -11.186745   |
| GO:1902041 | regulation of extrinsic apoptotic signaling pathway via death domain receptors          | -6.958748065 |
| GO:1902042 | negative regulation of extrinsic apoptotic signaling pathway via death domain receptors | -6.543434086 |
| GO:0090199 | regulation of release of cytochrome c from mitochondria                                 | -4.19429302  |
| GO:0010823 | negative regulation of mitochondrion organization                                       | -4.05398091  |
| GO:0090201 | negative regulation of release of cytochrome c from mitochondria                        | -3.997606803 |
| GO:2001239 | regulation of extrinsic apoptotic signaling pathway in absence of ligand                | -2.967301303 |
| GO:0031644 | regulation of nervous system process                                                    | -2.380218931 |
| GO:0014068 | positive regulation of phosphatidylinositol 3-kinase signaling                          | -14.69697509 |
| GO:0014066 | regulation of phosphatidylinositol 3-kinase signaling                                   | -14.41229536 |
| GO:1904892 | regulation of receptor signaling pathway via STAT                                       | -5.516753227 |
| GO:0071346 | cellular response to interferon-gamma                                                   | -5.066523799 |
| GO:0034341 | response to interferon-gamma                                                            | -4.590863974 |
| GO:0046425 | regulation of receptor signaling pathway via JAK-STAT                                   | -4.578672946 |
| GO:0046427 | positive regulation of receptor signaling pathway via JAK-STAT                          | -4.563621458 |
| GO:1904894 | positive regulation of receptor signaling pathway via STAT                              | -4.388971116 |
| GO:0042531 | positive regulation of tyrosine phosphorylation of STAT protein                         | -3.591792775 |
| GO:0042509 | regulation of tyrosine phosphorylation of STAT protein                                  | -3.256454688 |
| GO:0048660 | regulation of smooth muscle cell proliferation                                          | -14.59839173 |
| GO:0048661 | positive regulation of smooth muscle cell proliferation                                 | -9.208808115 |
| GO:0034612 | response to tumor necrosis factor                                                       | -6.388814949 |
| GO:0031663 | lipopolysaccharide-mediated signaling pathway                                           | -6.143833237 |
| GO:0071356 | cellular response to tumor necrosis factor                                              | -5.764254059 |
| GO:0048732 | gland development                                                                       | -14.55945095 |
| GO:0008285 | negative regulation of cell population proliferation                                    | -11.84505922 |
| GO:0002685 | regulation of leukocyte migration                                                       | -14.28644142 |
| GO:0050920 | regulation of chemotaxis                                                                | -12.80508424 |
| GO:0002688 | regulation of leukocyte chemotaxis                                                      | -9.523847485 |
| GO:0050921 | positive regulation of chemotaxis                                                       | -9.004680611 |
| GO:0002687 | positive regulation of leukocyte migration                                              | -8.974409356 |
| GO:0002690 | positive regulation of leukocyte chemotaxis                                             | -6.580941646 |
| GO:0010758 | regulation of macrophage chemotaxis                                                     | -5.170556276 |
| GO:1905521 | regulation of macrophage migration                                                      | -4.430899217 |

|            |                                                                    |              |
|------------|--------------------------------------------------------------------|--------------|
| GO:1901652 | response to peptide                                                | -13.80023289 |
| GO:1901699 | cellular response to nitrogen compound                             | -11.76198328 |
| GO:0071417 | cellular response to organonitrogen compound                       | -11.60211447 |
| GO:1903829 | positive regulation of protein localization                        | -11.56433151 |
| GO:0051223 | regulation of protein transport                                    | -10.84773567 |
| GO:0070201 | regulation of establishment of protein localization                | -10.49733981 |
| GO:0043434 | response to peptide hormone                                        | -10.01971019 |
| GO:0060341 | regulation of cellular localization                                | -9.789714846 |
| GO:0051222 | positive regulation of protein transport                           | -8.984863675 |
| GO:1904951 | positive regulation of establishment of protein localization       | -8.705369812 |
| GO:0071375 | cellular response to peptide hormone stimulus                      | -7.859657    |
| GO:1900182 | positive regulation of protein localization to nucleus             | -6.918553397 |
| GO:1901653 | cellular response to peptide                                       | -6.764531882 |
| GO:1900180 | regulation of protein localization to nucleus                      | -6.751267874 |
| GO:0032868 | response to insulin                                                | -6.29966918  |
| GO:0032869 | cellular response to insulin stimulus                              | -5.23382086  |
| GO:0032386 | regulation of intracellular transport                              | -4.632557242 |
| GO:0033157 | regulation of intracellular protein transport                      | -4.096494249 |
| GO:0090316 | positive regulation of intracellular protein transport             | -4.072688682 |
| GO:0046822 | regulation of nucleocytoplasmic transport                          | -3.926057035 |
| GO:0046824 | positive regulation of nucleocytoplasmic transport                 | -3.777465917 |
| GO:0032388 | positive regulation of intracellular transport                     | -3.510233948 |
| GO:0042307 | positive regulation of protein import into nucleus                 | -3.121184104 |
| GO:0042306 | regulation of protein import into nucleus                          | -2.641828902 |
| GO:0050778 | positive regulation of immune response                             | -13.77571313 |
| GO:0002764 | immune response-regulating signaling pathway                       | -9.736491901 |
| GO:0002253 | activation of immune response                                      | -8.330832001 |
| GO:0002768 | immune response-regulating cell surface receptor signaling pathway | -8.008884027 |
| GO:0002429 | immune response-activating cell surface receptor signaling pathway | -5.494937956 |
| GO:0002757 | immune response-activating signal transduction                     | -5.494937956 |
| GO:0050851 | antigen receptor-mediated signaling pathway                        | -5.340477368 |
| GO:0050852 | T cell receptor signaling pathway                                  | -5.090708846 |
| GO:0050853 | B cell receptor signaling pathway                                  | -3.774735282 |
| GO:0001655 | urogenital system development                                      | -13.72386201 |
| GO:0072001 | renal system development                                           | -10.00555495 |
| GO:0001822 | kidney development                                                 | -9.094100882 |
| GO:2000027 | regulation of animal organ morphogenesis                           | -4.590863974 |
| GO:0001823 | mesonephros development                                            | -4.29510201  |
| GO:0019218 | regulation of steroid metabolic process                            | -3.945870798 |
| GO:0003156 | regulation of animal organ formation                               | -3.648256523 |
| GO:0072073 | kidney epithelium development                                      | -3.505116636 |

|            |                                                            |              |
|------------|------------------------------------------------------------|--------------|
| GO:0110110 | positive regulation of animal organ morphogenesis          | -3.460510079 |
| GO:0061326 | renal tubule development                                   | -3.297108752 |
| GO:0001657 | ureteric bud development                                   | -3.256454688 |
| GO:0072163 | mesonephric epithelium development                         | -3.236533122 |
| GO:0072164 | mesonephric tubule development                             | -3.236533122 |
| GO:0072006 | nephron development                                        | -2.54131655  |
| GO:0050810 | regulation of steroid biosynthetic process                 | -2.371219039 |
| GO:0072080 | nephron tubule development                                 | -2.288506924 |
| GO:0051046 | regulation of secretion                                    | -13.13424077 |
| GO:1903530 | regulation of secretion by cell                            | -12.96034976 |
| GO:1903532 | positive regulation of secretion by cell                   | -9.301142639 |
| GO:0051047 | positive regulation of secretion                           | -8.808240449 |
| GO:0050708 | regulation of protein secretion                            | -8.675713583 |
| GO:0046883 | regulation of hormone secretion                            | -6.907834949 |
| GO:0046887 | positive regulation of hormone secretion                   | -5.811197723 |
| GO:0090087 | regulation of peptide transport                            | -5.674382207 |
| GO:0050714 | positive regulation of protein secretion                   | -5.671488577 |
| GO:0050796 | regulation of insulin secretion                            | -5.27247342  |
| GO:0090276 | regulation of peptide hormone secretion                    | -4.746366359 |
| GO:0002791 | regulation of peptide secretion                            | -4.699317536 |
| GO:0032024 | positive regulation of insulin secretion                   | -3.591792775 |
| GO:0090277 | positive regulation of peptide hormone secretion           | -3.08607163  |
| GO:0002793 | positive regulation of peptide secretion                   | -3.050728521 |
| GO:1902532 | negative regulation of intracellular signal transduction   | -13.03642147 |
| GO:0043124 | negative regulation of I-kappaB kinase/NF-kappaB signaling | -6.906017302 |
| GO:0043122 | regulation of I-kappaB kinase/NF-kappaB signaling          | -4.621809367 |
| GO:0048729 | tissue morphogenesis                                       | -12.91507804 |
| GO:0002009 | morphogenesis of an epithelium                             | -12.6219437  |
| GO:0061180 | mammary gland epithelium development                       | -9.673603132 |
| GO:0030879 | mammary gland development                                  | -9.558687627 |
| GO:0022612 | gland morphogenesis                                        | -8.971712316 |
| GO:0060562 | epithelial tube morphogenesis                              | -8.739409474 |
| GO:0061138 | morphogenesis of a branching epithelium                    | -8.387896728 |
| GO:0001763 | morphogenesis of a branching structure                     | -8.161571002 |
| GO:0030855 | epithelial cell differentiation                            | -8.009049865 |
| GO:0048754 | branching morphogenesis of an epithelial tube              | -7.948682988 |
| GO:0060065 | uterus development                                         | -7.449166496 |
| GO:0060443 | mammary gland morphogenesis                                | -7.427062266 |
| GO:0035265 | organ growth                                               | -6.918553397 |
| GO:0060736 | prostate gland growth                                      | -6.697100865 |
| GO:0060603 | mammary gland duct morphogenesis                           | -6.695815484 |
| GO:0030850 | prostate gland development                                 | -5.809329102 |
| GO:0048806 | genitalia development                                      | -5.660591272 |



|            |                                                                     |              |
|------------|---------------------------------------------------------------------|--------------|
| GO:0060444 | branching involved in mammary gland duct morphogenesis              | -5.542914711 |
| GO:0060745 | mammary gland branching involved in pregnancy                       | -5.491517955 |
| GO:0060740 | prostate gland epithelium morphogenesis                             | -5.461481729 |
| GO:0060512 | prostate gland morphogenesis                                        | -5.309661703 |
| GO:0040007 | growth                                                              | -5.049192521 |
| GO:0048589 | developmental growth                                                | -5.049192521 |
| GO:0043627 | response to estrogen                                                | -4.783424718 |
| GO:0060571 | morphogenesis of an epithelial fold                                 | -4.300505605 |
| GO:0030540 | female genitalia development                                        | -4.13991307  |
| GO:0060688 | regulation of morphogenesis of a branching structure                | -4.05398091  |
| GO:0030520 | intracellular estrogen receptor signaling pathway                   | -3.997606803 |
| GO:0002064 | epithelial cell development                                         | -3.746002342 |
| GO:1905330 | regulation of morphogenesis of an epithelium                        | -3.642613753 |
| GO:0003382 | epithelial cell morphogenesis                                       | -3.297846025 |
| GO:0048645 | animal organ formation                                              | -3.224038362 |
| GO:2000377 | regulation of reactive oxygen species metabolic process             | -12.75419558 |
| GO:2000379 | positive regulation of reactive oxygen species metabolic process    | -6.038037251 |
| GO:0032653 | regulation of interleukin-10 production                             | -3.695159677 |
| GO:0090322 | regulation of superoxide metabolic process                          | -3.297846025 |
| GO:0032655 | regulation of interleukin-12 production                             | -2.517844054 |
| GO:0044057 | regulation of system process                                        | -12.53392151 |
| GO:0090257 | regulation of muscle system process                                 | -5.578005572 |
| GO:0062012 | regulation of small molecule metabolic process                      | -12.35011022 |
| GO:0019216 | regulation of lipid metabolic process                               | -11.32376123 |
| GO:0045834 | positive regulation of lipid metabolic process                      | -11.08678946 |
| GO:1905952 | regulation of lipid localization                                    | -10.27177678 |
| GO:0062013 | positive regulation of small molecule metabolic process             | -10.0098941  |
| GO:0032368 | regulation of lipid transport                                       | -9.885655747 |
| GO:1905953 | negative regulation of lipid localization                           | -9.257340565 |
| GO:0010887 | negative regulation of cholesterol storage                          | -9.077109052 |
| GO:0010743 | regulation of macrophage derived foam cell differentiation          | -8.173372195 |
| GO:0010565 | regulation of cellular ketone metabolic process                     | -7.977441712 |
| GO:0060331 | negative regulation of response to interferon-gamma                 | -7.839919449 |
| GO:0060336 | negative regulation of interferon-gamma-mediated signaling pathway  | -7.839919449 |
| GO:0010885 | regulation of cholesterol storage                                   | -7.689013834 |
| GO:0010888 | negative regulation of lipid storage                                | -7.338787904 |
| GO:0010883 | regulation of lipid storage                                         | -6.705781387 |
| GO:0019217 | regulation of fatty acid metabolic process                          | -6.645240103 |
| GO:0010745 | negative regulation of macrophage derived foam cell differentiation | -6.538943171 |
| GO:0060330 | regulation of response to interferon-gamma                          | -6.261202294 |

|            |                                                                 |              |
|------------|-----------------------------------------------------------------|--------------|
| GO:0060334 | regulation of interferon-gamma-mediated signaling pathway       | -6.261202294 |
| GO:0045923 | positive regulation of fatty acid metabolic process             | -6.026164049 |
| GO:0046890 | regulation of lipid biosynthetic process                        | -5.782565661 |
| GO:0032369 | negative regulation of lipid transport                          | -5.660591272 |
| GO:0032370 | positive regulation of lipid transport                          | -5.516753227 |
| GO:0046889 | positive regulation of lipid biosynthetic process               | -5.48770807  |
| GO:0042632 | cholesterol homeostasis                                         | -5.190083413 |
| GO:0055092 | sterol homeostasis                                              | -5.164833848 |
| GO:0043030 | regulation of macrophage activation                             | -5.012035481 |
| GO:1905954 | positive regulation of lipid localization                       | -4.881757815 |
| GO:0002832 | negative regulation of response to biotic stimulus              | -4.859684539 |
| GO:0046470 | phosphatidylcholine metabolic process                           | -4.846083842 |
| GO:0055088 | lipid homeostasis                                               | -4.810509219 |
| GO:0042752 | regulation of circadian rhythm                                  | -4.752445487 |
| GO:0045824 | negative regulation of innate immune response                   | -4.606640009 |
| GO:0010874 | regulation of cholesterol efflux                                | -4.02075444  |
| GO:0046486 | glycerolipid metabolic process                                  | -3.607592279 |
| GO:0010875 | positive regulation of cholesterol efflux                       | -3.598556005 |
| GO:0006644 | phospholipid metabolic process                                  | -3.559018779 |
| GO:0006650 | glycerophospholipid metabolic process                           | -3.392184112 |
| GO:0032371 | regulation of sterol transport                                  | -3.297108752 |
| GO:0032374 | regulation of cholesterol transport                             | -3.297108752 |
| GO:1905897 | regulation of response to endoplasmic reticulum stress          | -3.256454688 |
| GO:0032373 | positive regulation of sterol transport                         | -3.121184104 |
| GO:0032376 | positive regulation of cholesterol transport                    | -3.121184104 |
| GO:0042789 | mRNA transcription by RNA polymerase II                         | -3.057221553 |
| GO:0055090 | acylglycerol homeostasis                                        | -3.026484409 |
| GO:0070328 | triglyceride homeostasis                                        | -3.026484409 |
| GO:0090207 | regulation of triglyceride metabolic process                    | -2.996523184 |
| GO:1903573 | negative regulation of response to endoplasmic reticulum stress | -2.967301303 |
| GO:0009299 | mRNA transcription                                              | -2.910941679 |
| GO:0120163 | negative regulation of cold-induced thermogenesis               | -2.883742534 |
| GO:0042304 | regulation of fatty acid biosynthetic process                   | -2.83116673  |
| GO:0060193 | positive regulation of lipase activity                          | -12.17908013 |
| GO:0051345 | positive regulation of hydrolase activity                       | -11.65667311 |
| GO:0060191 | regulation of lipase activity                                   | -10.92205192 |
| GO:0010518 | positive regulation of phospholipase activity                   | -8.219438111 |
| GO:0010517 | regulation of phospholipase activity                            | -7.653500333 |
| GO:0010863 | positive regulation of phospholipase C activity                 | -5.969764989 |
| GO:1900274 | regulation of phospholipase C activity                          | -5.861421458 |
| GO:0048145 | regulation of fibroblast proliferation                          | -4.497111344 |
| GO:0060964 | regulation of miRNA-mediated gene silencing                     | -3.057221553 |

|            |                                                                             |              |
|------------|-----------------------------------------------------------------------------|--------------|
| GO:1900368 | regulation of post-transcriptional gene silencing by RNA                    | -2.996523184 |
| GO:0060147 | regulation of post-transcriptional gene silencing                           | -2.967301303 |
| GO:0060966 | regulation of gene silencing by RNA                                         | -2.938784718 |
| GO:0048146 | positive regulation of fibroblast proliferation                             | -2.857159545 |
| GO:0002444 | myeloid leukocyte mediated immunity                                         | -11.76313485 |
| GO:0002252 | immune effector process                                                     | -10.76721729 |
| GO:0002446 | neutrophil mediated immunity                                                | -9.24148916  |
| GO:0042742 | defense response to bacterium                                               | -8.042860852 |
| GO:0070942 | neutrophil mediated cytotoxicity                                            | -7.28670494  |
| GO:0070943 | neutrophil-mediated killing of symbiont cell                                | -7.28670494  |
| GO:0070944 | neutrophil-mediated killing of bacterium                                    | -7.28670494  |
| GO:0002443 | leukocyte mediated immunity                                                 | -7.201584248 |
| GO:0050829 | defense response to Gram-negative bacterium                                 | -6.882876887 |
| GO:0070945 | neutrophil-mediated killing of gram-negative bacterium                      | -6.429151568 |
| GO:0051873 | killing by host of symbiont cells                                           | -5.170556276 |
| GO:0051702 | biological process involved in interaction with symbiont                    | -5.164833848 |
| GO:0009620 | response to fungus                                                          | -5.118712187 |
| GO:0006959 | humoral immune response                                                     | -5.086188203 |
| GO:0001909 | leukocyte mediated cytotoxicity                                             | -4.02075444  |
| GO:0019730 | antimicrobial humoral response                                              | -3.774735282 |
| GO:0061844 | antimicrobial humoral immune response mediated by antimicrobial peptide     | -3.494919094 |
| GO:0002526 | acute inflammatory response                                                 | -3.403810574 |
| GO:0001906 | cell killing                                                                | -3.068294072 |
| GO:0050832 | defense response to fungus                                                  | -2.857159545 |
| GO:0019731 | antibacterial humoral response                                              | -2.686335833 |
| GO:0009411 | response to UV                                                              | -11.35818208 |
| GO:0009314 | response to radiation                                                       | -10.75156466 |
| GO:0070141 | response to UV-A                                                            | -10.62371139 |
| GO:0009416 | response to light stimulus                                                  | -9.778659818 |
| GO:0071492 | cellular response to UV-A                                                   | -6.871648786 |
| GO:0071214 | cellular response to abiotic stimulus                                       | -6.624655511 |
| GO:0104004 | cellular response to environmental stimulus                                 | -6.624655511 |
| GO:0071478 | cellular response to radiation                                              | -5.746056577 |
| GO:0034644 | cellular response to UV                                                     | -5.430679991 |
| GO:0071482 | cellular response to light stimulus                                         | -4.816174602 |
| GO:0048013 | ephrin receptor signaling pathway                                           | -4.087917396 |
| GO:0007566 | embryo implantation                                                         | -3.057221553 |
| GO:0035987 | endodermal cell differentiation                                             | -3.057221553 |
| GO:0150077 | regulation of neuroinflammatory response                                    | -3.057221553 |
| GO:1904707 | positive regulation of vascular associated smooth muscle cell proliferation | -2.883742534 |
| GO:0060324 | face development                                                            | -2.857159545 |

|            |                                                                                           |              |
|------------|-------------------------------------------------------------------------------------------|--------------|
| GO:0001706 | endoderm formation                                                                        | -2.780855605 |
| GO:0001704 | formation of primary germ layer                                                           | -2.723786282 |
| GO:0007492 | endoderm development                                                                      | -2.320851758 |
| GO:0007369 | gastrulation                                                                              | -2.188651941 |
| GO:1901654 | response to ketone                                                                        | -11.20789014 |
| GO:0031960 | response to corticosteroid                                                                | -7.227424888 |
| GO:1901655 | cellular response to ketone                                                               | -6.456694159 |
| GO:0051384 | response to glucocorticoid                                                                | -5.433119651 |
| GO:0071548 | response to dexamethasone                                                                 | -4.430899217 |
| GO:0071384 | cellular response to corticosteroid stimulus                                              | -3.695159677 |
| GO:0071549 | cellular response to dexamethasone stimulus                                               | -3.648256523 |
| GO:0071385 | cellular response to glucocorticoid stimulus                                              | -2.732631226 |
| GO:0045596 | negative regulation of cell differentiation                                               | -11.04190608 |
| GO:0040008 | regulation of growth                                                                      | -10.54686563 |
| GO:0045927 | positive regulation of growth                                                             | -9.598754249 |
| GO:0001558 | regulation of cell growth                                                                 | -9.009694606 |
| GO:0030307 | positive regulation of cell growth                                                        | -8.235530811 |
| GO:0043281 | regulation of cysteine-type endopeptidase activity involved in apoptotic process          | -10.93194826 |
| GO:2000116 | regulation of cysteine-type endopeptidase activity                                        | -10.30233488 |
| GO:0030162 | regulation of proteolysis                                                                 | -9.666576751 |
| GO:0052547 | regulation of peptidase activity                                                          | -8.511287502 |
| GO:0052548 | regulation of endopeptidase activity                                                      | -7.967894363 |
| GO:0043280 | positive regulation of cysteine-type endopeptidase activity involved in apoptotic process | -5.740423278 |
| GO:2001056 | positive regulation of cysteine-type endopeptidase activity                               | -5.351554927 |
| GO:0045862 | positive regulation of proteolysis                                                        | -5.089900538 |
| GO:0010950 | positive regulation of endopeptidase activity                                             | -4.794318788 |
| GO:0010952 | positive regulation of peptidase activity                                                 | -4.519572169 |
| GO:0006919 | activation of cysteine-type endopeptidase activity involved in apoptotic process          | -3.360223118 |
| GO:2001235 | positive regulation of apoptotic signaling pathway                                        | -2.469925039 |
| GO:0008283 | cell population proliferation                                                             | -10.89113188 |
| GO:0050673 | epithelial cell proliferation                                                             | -8.057224672 |
| GO:0080135 | regulation of cellular response to stress                                                 | -10.76887381 |
| GO:0051129 | negative regulation of cellular component organization                                    | -9.349154664 |
| GO:0010639 | negative regulation of organelle organization                                             | -4.531823314 |
| GO:0030324 | lung development                                                                          | -10.52796053 |
| GO:0030323 | respiratory tube development                                                              | -10.41235365 |
| GO:0060541 | respiratory system development                                                            | -9.874018577 |
| GO:0000902 | cell morphogenesis                                                                        | -10.47745816 |
| GO:0000904 | cell morphogenesis involved in differentiation                                            | -7.728264592 |
| GO:0061564 | axon development                                                                          | -5.802249407 |

|            |                                                        |              |
|------------|--------------------------------------------------------|--------------|
| GO:0031175 | neuron projection development                          | -5.085367178 |
| GO:0032990 | cell part morphogenesis                                | -3.416548964 |
| GO:0007409 | axonogenesis                                           | -2.988651126 |
| GO:0048812 | neuron projection morphogenesis                        | -2.924996159 |
| GO:0120039 | plasma membrane bounded cell projection morphogenesis  | -2.90086338  |
| GO:0048858 | cell projection morphogenesis                          | -2.87699874  |
| GO:0032989 | cellular component morphogenesis                       | -2.874578644 |
| GO:0048667 | cell morphogenesis involved in neuron differentiation  | -2.543518055 |
| GO:0006809 | nitric oxide biosynthetic process                      | -10.20100239 |
| GO:0046209 | nitric oxide metabolic process                         | -9.522661152 |
| GO:2001057 | reactive nitrogen species metabolic process            | -9.378162529 |
| GO:0006527 | arginine catabolic process                             | -7.28670494  |
| GO:0006525 | arginine metabolic process                             | -6.13780614  |
| GO:0009063 | cellular amino acid catabolic process                  | -6.114690297 |
| GO:1901606 | alpha-amino acid catabolic process                     | -5.375014846 |
| GO:0009065 | glutamine family amino acid catabolic process          | -5.309661703 |
| GO:0006520 | cellular amino acid metabolic process                  | -5.245708372 |
| GO:0046395 | carboxylic acid catabolic process                      | -5.084509487 |
| GO:0016054 | organic acid catabolic process                         | -5.027527274 |
| GO:0019627 | urea metabolic process                                 | -4.823930581 |
| GO:0071941 | nitrogen cycle metabolic process                       | -4.823930581 |
| GO:1901605 | alpha-amino acid metabolic process                     | -4.476613983 |
| GO:0044282 | small molecule catabolic process                       | -3.648832041 |
| GO:0009064 | glutamine family amino acid metabolic process          | -3.51857078  |
| GO:0001890 | placenta development                                   | -10.10548493 |
| GO:0007507 | heart development                                      | -9.290459653 |
| GO:0009792 | embryo development ending in birth or egg hatching     | -6.471305844 |
| GO:0043009 | chordate embryonic development                         | -5.884509546 |
| GO:0001701 | in utero embryonic development                         | -4.959453215 |
| GO:0048568 | embryonic organ development                            | -4.394517462 |
| GO:0001892 | embryonic placenta development                         | -4.319220707 |
| GO:0060711 | labyrinthine layer development                         | -4.19429302  |
| GO:0007423 | sensory organ development                              | -3.610167822 |
| GO:0048598 | embryonic morphogenesis                                | -3.48262788  |
| GO:0002697 | regulation of immune effector process                  | -9.98560673  |
| GO:0002703 | regulation of leukocyte mediated immunity              | -7.897490632 |
| GO:0002699 | positive regulation of immune effector process         | -7.657710736 |
| GO:0031341 | regulation of cell killing                             | -5.164833848 |
| GO:0031343 | positive regulation of cell killing                    | -4.910802172 |
| GO:0002705 | positive regulation of leukocyte mediated immunity     | -4.36862254  |
| GO:0002706 | regulation of lymphocyte mediated immunity             | -2.890820235 |
| GO:0001912 | positive regulation of leukocyte mediated cytotoxicity | -2.620206303 |
| GO:0001910 | regulation of leukocyte mediated cytotoxicity          | -2.15375782  |

|            |                                                                                                 |              |
|------------|-------------------------------------------------------------------------------------------------|--------------|
| GO:0002709 | regulation of T cell mediated immunity                                                          | -2.11233501  |
| GO:0044089 | positive regulation of cellular component biogenesis                                            | -9.92104654  |
| GO:0031334 | positive regulation of protein-containing complex assembly                                      | -8.833337619 |
| GO:0043254 | regulation of protein-containing complex assembly                                               | -8.217880939 |
| GO:0006909 | phagocytosis                                                                                    | -4.889985371 |
| GO:0045806 | negative regulation of endocytosis                                                              | -3.894414272 |
| GO:0060627 | regulation of vesicle-mediated transport                                                        | -3.737496337 |
| GO:0030100 | regulation of endocytosis                                                                       | -3.396359546 |
| GO:0051098 | regulation of binding                                                                           | -9.801800955 |
| GO:0030099 | myeloid cell differentiation                                                                    | -7.859657    |
| GO:0060391 | positive regulation of SMAD protein signal transduction                                         | -7.820043856 |
| GO:0090100 | positive regulation of transmembrane receptor protein serine/threonine kinase signaling pathway | -7.072067127 |
| GO:0051099 | positive regulation of binding                                                                  | -6.981046717 |
| GO:0060390 | regulation of SMAD protein signal transduction                                                  | -6.543434086 |
| GO:0090092 | regulation of transmembrane receptor protein serine/threonine kinase signaling pathway          | -6.100831869 |
| GO:0051101 | regulation of DNA binding                                                                       | -5.83521409  |
| GO:0043388 | positive regulation of DNA binding                                                              | -5.193141575 |
| GO:0002573 | myeloid leukocyte differentiation                                                               | -4.79473041  |
| GO:0007178 | transmembrane receptor protein serine/threonine kinase signaling pathway                        | -4.563296057 |
| GO:0001818 | negative regulation of cytokine production                                                      | -9.801800955 |
| GO:0051897 | positive regulation of protein kinase B signaling                                               | -9.701200213 |
| GO:0051896 | regulation of protein kinase B signaling                                                        | -8.954454623 |
| GO:0010631 | epithelial cell migration                                                                       | -9.506688451 |
| GO:0090132 | epithelium migration                                                                            | -9.376009864 |
| GO:0090130 | tissue migration                                                                                | -9.128026859 |
| GO:0001667 | ameboidal-type cell migration                                                                   | -6.711372043 |
| GO:0043542 | endothelial cell migration                                                                      | -6.188424872 |
| GO:0007565 | female pregnancy                                                                                | -9.394535214 |
| GO:0044703 | multi-organism reproductive process                                                             | -8.881363746 |
| GO:0044706 | multi-multicellular organism process                                                            | -8.66947871  |
| GO:0060135 | maternal process involved in female pregnancy                                                   | -8.053631677 |
| GO:0001893 | maternal placenta development                                                                   | -4.812136674 |
| GO:0046697 | decidualization                                                                                 | -3.810653527 |
| GO:0043086 | negative regulation of catalytic activity                                                       | -9.262902146 |
| GO:0045861 | negative regulation of proteolysis                                                              | -7.068760082 |
| GO:0051346 | negative regulation of hydrolase activity                                                       | -6.822437729 |
| GO:0043154 | negative regulation of cysteine-type endopeptidase activity involved in apoptotic process       | -5.828866894 |
| GO:2000117 | negative regulation of cysteine-type endopeptidase activity                                     | -5.57594833  |
| GO:0010466 | negative regulation of peptidase activity                                                       | -4.538012652 |

|            |                                                                                                                           |              |
|------------|---------------------------------------------------------------------------------------------------------------------------|--------------|
| GO:0010951 | negative regulation of endopeptidase activity                                                                             | -3.790278081 |
| GO:1905114 | cell surface receptor signaling pathway involved in cell-cell signaling                                                   | -3.109546336 |
| GO:0016055 | Wnt signaling pathway                                                                                                     | -2.142507837 |
| GO:0198738 | cell-cell signaling by wnt                                                                                                | -2.142507837 |
| GO:0019725 | cellular homeostasis                                                                                                      | -9.255887293 |
| GO:0055082 | cellular chemical homeostasis                                                                                             | -7.739252798 |
| GO:0055080 | cation homeostasis                                                                                                        | -7.266678635 |
| GO:0098771 | inorganic ion homeostasis                                                                                                 | -7.168471926 |
| GO:0050801 | ion homeostasis                                                                                                           | -6.988569488 |
| GO:0055065 | metal ion homeostasis                                                                                                     | -6.484750597 |
| GO:0030003 | cellular cation homeostasis                                                                                               | -5.672686326 |
| GO:0006873 | cellular ion homeostasis                                                                                                  | -5.517096473 |
| GO:0055076 | transition metal ion homeostasis                                                                                          | -5.496011604 |
| GO:0006875 | cellular metal ion homeostasis                                                                                            | -4.801382538 |
| GO:0046916 | cellular transition metal ion homeostasis                                                                                 | -3.848849255 |
| GO:0072507 | divalent inorganic cation homeostasis                                                                                     | -3.779680595 |
| GO:0072503 | cellular divalent inorganic cation homeostasis                                                                            | -3.267802072 |
| GO:0055074 | calcium ion homeostasis                                                                                                   | -2.563556743 |
| GO:0055072 | iron ion homeostasis                                                                                                      | -2.15375782  |
| GO:0002250 | adaptive immune response                                                                                                  | -9.167706854 |
| GO:0002460 | adaptive immune response based on somatic recombination of immune receptors built from immunoglobulin superfamily domains | -2.300126015 |
| GO:0048872 | homeostasis of number of cells                                                                                            | -8.956998904 |
| GO:0002262 | myeloid cell homeostasis                                                                                                  | -5.859448924 |
| GO:0034101 | erythrocyte homeostasis                                                                                                   | -5.215612988 |
| GO:0030218 | erythrocyte differentiation                                                                                               | -4.24775971  |
| GO:0001776 | leukocyte homeostasis                                                                                                     | -3.426082434 |
| GO:0043029 | T cell homeostasis                                                                                                        | -3.297846025 |
| GO:0097194 | execution phase of apoptosis                                                                                              | -2.83116673  |
| GO:0002260 | lymphocyte homeostasis                                                                                                    | -2.663866989 |
| GO:0097305 | response to alcohol                                                                                                       | -8.93630579  |
| GO:1903426 | regulation of reactive oxygen species biosynthetic process                                                                | -5.567153769 |
| GO:0045471 | response to ethanol                                                                                                       | -4.731597802 |
| GO:1903579 | negative regulation of ATP metabolic process                                                                              | -3.460510079 |
| GO:2000378 | negative regulation of reactive oxygen species metabolic process                                                          | -2.883742534 |
| GO:1903578 | regulation of ATP metabolic process                                                                                       | -2.07245992  |
| GO:0001501 | skeletal system development                                                                                               | -8.817575438 |
| GO:0001503 | ossification                                                                                                              | -6.256800418 |
| GO:0009612 | response to mechanical stimulus                                                                                           | -5.340477368 |
| GO:0060348 | bone development                                                                                                          | -5.24746245  |

|            |                                                                             |              |
|------------|-----------------------------------------------------------------------------|--------------|
| GO:0045936 | negative regulation of phosphate metabolic process                          | -8.720921622 |
| GO:0010563 | negative regulation of phosphorus metabolic process                         | -8.707565302 |
| GO:0042326 | negative regulation of phosphorylation                                      | -5.802249407 |
| GO:0001933 | negative regulation of protein phosphorylation                              | -5.401431576 |
| GO:0051348 | negative regulation of transferase activity                                 | -5.335196965 |
| GO:0031400 | negative regulation of protein modification process                         | -5.290649318 |
| GO:0071901 | negative regulation of protein serine/threonine kinase activity             | -4.670193976 |
| GO:0006469 | negative regulation of protein kinase activity                              | -4.233686037 |
| GO:0033673 | negative regulation of kinase activity                                      | -3.944015866 |
| GO:0043407 | negative regulation of MAP kinase activity                                  | -3.777465917 |
| GO:0043409 | negative regulation of MAPK cascade                                         | -2.021836371 |
| GO:1901214 | regulation of neuron death                                                  | -8.621340543 |
| GO:0097190 | apoptotic signaling pathway                                                 | -8.338565027 |
| GO:0048662 | negative regulation of smooth muscle cell proliferation                     | -7.344447048 |
| GO:1904705 | regulation of vascular associated smooth muscle cell proliferation          | -6.812871715 |
| GO:0043523 | regulation of neuron apoptotic process                                      | -6.29966918  |
| GO:1901215 | negative regulation of neuron death                                         | -5.24746245  |
| GO:1904706 | negative regulation of vascular associated smooth muscle cell proliferation | -4.388971116 |
| GO:0097193 | intrinsic apoptotic signaling pathway                                       | -4.183005797 |
| GO:0008630 | intrinsic apoptotic signaling pathway in response to DNA damage             | -3.566996298 |
| GO:0010660 | regulation of muscle cell apoptotic process                                 | -3.2766443   |
| GO:0043524 | negative regulation of neuron apoptotic process                             | -3.257114236 |
| GO:0010543 | regulation of platelet activation                                           | -8.51903376  |
| GO:0034110 | regulation of homotypic cell-cell adhesion                                  | -6.205291712 |
| GO:0090330 | regulation of platelet aggregation                                          | -5.0422319   |
| GO:0034112 | positive regulation of homotypic cell-cell adhesion                         | -4.300505605 |
| GO:0042119 | neutrophil activation                                                       | -3.598556005 |
| GO:0036230 | granulocyte activation                                                      | -3.417757237 |
| GO:0002548 | monocyte chemotaxis                                                         | -2.938784718 |
| GO:0038093 | Fc receptor signaling pathway                                               | -8.51903376  |
| GO:0002274 | myeloid leukocyte activation                                                | -6.60263341  |
| GO:0038095 | Fc-epsilon receptor signaling pathway                                       | -5.383841545 |
| GO:0046903 | secretion                                                                   | -4.77998074  |
| GO:0002366 | leukocyte activation involved in immune response                            | -4.699317536 |
| GO:0002263 | cell activation involved in immune response                                 | -4.637939042 |
| GO:0045579 | positive regulation of B cell differentiation                               | -4.484681481 |
| GO:0002279 | mast cell activation involved in immune response                            | -3.932113785 |
| GO:0002902 | regulation of B cell apoptotic process                                      | -3.932113785 |
| GO:0043303 | mast cell degranulation                                                     | -3.932113785 |
| GO:0002275 | myeloid cell activation involved in immune response                         | -3.894414272 |



|            |                                                                            |              |
|------------|----------------------------------------------------------------------------|--------------|
| GO:0002448 | mast cell mediated immunity                                                | -3.810653527 |
| GO:0045576 | mast cell activation                                                       | -3.700049736 |
| GO:0030888 | regulation of B cell proliferation                                         | -3.668664214 |
| GO:0045577 | regulation of B cell differentiation                                       | -3.417757237 |
| GO:0043299 | leukocyte degranulation                                                    | -3.297846025 |
| GO:0002673 | regulation of acute inflammatory response                                  | -2.883742534 |
| GO:0032418 | lysosome localization                                                      | -2.756492868 |
| GO:1990849 | vacuolar localization                                                      | -2.756492868 |
| GO:0002702 | positive regulation of production of molecular mediator of immune response | -2.642648247 |
| GO:0050864 | regulation of B cell activation                                            | -2.63701341  |
| GO:0045055 | regulated exocytosis                                                       | -2.517103536 |
| GO:0006887 | exocytosis                                                                 | -2.418013114 |
| GO:0050871 | positive regulation of B cell activation                                   | -2.275929828 |
| GO:0032940 | secretion by cell                                                          | -2.097946359 |
| GO:0046456 | icosanoid biosynthetic process                                             | -8.51903376  |
| GO:0006690 | icosanoid metabolic process                                                | -8.506273005 |
| GO:0071466 | cellular response to xenobiotic stimulus                                   | -8.235530811 |
| GO:0044283 | small molecule biosynthetic process                                        | -7.91689543  |
| GO:0046394 | carboxylic acid biosynthetic process                                       | -7.364439906 |
| GO:0016053 | organic acid biosynthetic process                                          | -7.331324229 |
| GO:0006631 | fatty acid metabolic process                                               | -6.489754039 |
| GO:0006805 | xenobiotic metabolic process                                               | -6.16877933  |
| GO:0008610 | lipid biosynthetic process                                                 | -5.63549519  |
| GO:0032787 | monocarboxylic acid metabolic process                                      | -5.535254779 |
| GO:0042178 | xenobiotic catabolic process                                               | -5.309661703 |
| GO:0033559 | unsaturated fatty acid metabolic process                                   | -5.090708846 |
| GO:0042759 | long-chain fatty acid biosynthetic process                                 | -5.0422319   |
| GO:0006633 | fatty acid biosynthetic process                                            | -4.752445487 |
| GO:0006575 | cellular modified amino acid metabolic process                             | -4.714901986 |
| GO:0006692 | prostanoid metabolic process                                               | -4.518163071 |
| GO:0006693 | prostaglandin metabolic process                                            | -4.518163071 |
| GO:0072330 | monocarboxylic acid biosynthetic process                                   | -3.997238423 |
| GO:0001676 | long-chain fatty acid metabolic process                                    | -3.792986253 |
| GO:0006749 | glutathione metabolic process                                              | -2.498434788 |
| GO:0044272 | sulfur compound biosynthetic process                                       | -2.402092399 |
| GO:0018209 | peptidyl-serine modification                                               | -8.511848544 |
| GO:0018105 | peptidyl-serine phosphorylation                                            | -7.879362112 |
| GO:0043393 | regulation of protein binding                                              | -6.480454685 |
| GO:0018107 | peptidyl-threonine phosphorylation                                         | -5.966250708 |
| GO:0018210 | peptidyl-threonine modification                                            | -5.667640153 |
| GO:0051100 | negative regulation of binding                                             | -4.94392675  |
| GO:0032091 | negative regulation of protein binding                                     | -4.090776771 |

|            |                                                                |              |
|------------|----------------------------------------------------------------|--------------|
| GO:0010906 | regulation of glucose metabolic process                        | -3.585147496 |
| GO:0010675 | regulation of cellular carbohydrate metabolic process          | -3.151522286 |
| GO:0010907 | positive regulation of glucose metabolic process               | -3.026484409 |
| GO:0006109 | regulation of carbohydrate metabolic process                   | -2.78452125  |
| GO:0010676 | positive regulation of cellular carbohydrate metabolic process | -2.663866989 |
| GO:0008286 | insulin receptor signaling pathway                             | -2.578150419 |
| GO:0005976 | polysaccharide metabolic process                               | -2.288506924 |
| GO:0045913 | positive regulation of carbohydrate metabolic process          | -2.241710754 |
| GO:0043269 | regulation of ion transport                                    | -8.477303986 |
| GO:0051924 | regulation of calcium ion transport                            | -6.481365199 |
| GO:0010959 | regulation of metal ion transport                              | -5.496859706 |
| GO:0043270 | positive regulation of ion transport                           | -4.355828848 |
| GO:0051928 | positive regulation of calcium ion transport                   | -2.578453323 |
| GO:0010810 | regulation of cell-substrate adhesion                          | -8.254909162 |
| GO:0001952 | regulation of cell-matrix adhesion                             | -8.216439272 |
| GO:0150116 | regulation of cell-substrate junction organization             | -6.112049883 |
| GO:0034446 | substrate adhesion-dependent cell spreading                    | -5.231422398 |
| GO:0051893 | regulation of focal adhesion assembly                          | -4.943974638 |
| GO:0090109 | regulation of cell-substrate junction assembly                 | -4.943974638 |
| GO:0150117 | positive regulation of cell-substrate junction organization    | -4.923165698 |
| GO:0043550 | regulation of lipid kinase activity                            | -4.783424718 |
| GO:0090218 | positive regulation of lipid kinase activity                   | -4.610387768 |
| GO:0031589 | cell-substrate adhesion                                        | -4.563296057 |
| GO:0001954 | positive regulation of cell-matrix adhesion                    | -3.925064108 |
| GO:0043551 | regulation of phosphatidylinositol 3-kinase activity           | -3.864349935 |
| GO:0051894 | positive regulation of focal adhesion assembly                 | -3.648256523 |
| GO:0010811 | positive regulation of cell-substrate adhesion                 | -3.601588866 |
| GO:1901888 | regulation of cell junction assembly                           | -3.46390458  |
| GO:0043552 | positive regulation of phosphatidylinositol 3-kinase activity  | -3.33651332  |
| GO:0007160 | cell-matrix adhesion                                           | -2.481567703 |
| GO:0032355 | response to estradiol                                          | -8.2474917   |
| GO:0043200 | response to amino acid                                         | -7.128930794 |
| GO:0001101 | response to acid chemical                                      | -6.725987508 |
| GO:0071392 | cellular response to estradiol stimulus                        | -4.473943562 |
| GO:0071230 | cellular response to amino acid stimulus                       | -2.241710754 |
| GO:0071229 | cellular response to acid chemical                             | -2.098876582 |
| GO:0007159 | leukocyte cell-cell adhesion                                   | -8.163095614 |
| GO:0098609 | cell-cell adhesion                                             | -5.920458802 |
| GO:0071674 | mononuclear cell migration                                     | -4.926560597 |
| GO:0070486 | leukocyte aggregation                                          | -4.823930581 |
| GO:0072678 | T cell migration                                               | -3.504816454 |
| GO:0072676 | lymphocyte migration                                           | -3.403810574 |
| GO:0045123 | cellular extravasation                                         | -3.026484409 |

|            |                                                                                  |              |
|------------|----------------------------------------------------------------------------------|--------------|
| GO:0038127 | ERBB signaling pathway                                                           | -8.000432293 |
| GO:0007173 | epidermal growth factor receptor signaling pathway                               | -7.067738962 |
| GO:0033135 | regulation of peptidyl-serine phosphorylation                                    | -5.331557269 |
| GO:1903076 | regulation of protein localization to plasma membrane                            | -5.090708846 |
| GO:1905475 | regulation of protein localization to membrane                                   | -4.826804822 |
| GO:1904375 | regulation of protein localization to cell periphery                             | -4.630175874 |
| GO:0045737 | positive regulation of cyclin-dependent protein serine/threonine kinase activity | -4.19429302  |
| GO:0070849 | response to epidermal growth factor                                              | -4.19429302  |
| GO:1904031 | positive regulation of cyclin-dependent protein kinase activity                  | -4.05398091  |
| GO:1905477 | positive regulation of protein localization to membrane                          | -3.945870798 |
| GO:0033138 | positive regulation of peptidyl-serine phosphorylation                           | -3.867851957 |
| GO:0032768 | regulation of monooxygenase activity                                             | -3.864349935 |
| GO:1903078 | positive regulation of protein localization to plasma membrane                   | -3.777465917 |
| GO:0000079 | regulation of cyclin-dependent protein serine/threonine kinase activity          | -3.738768372 |
| GO:1904029 | regulation of cyclin-dependent protein kinase activity                           | -3.686108516 |
| GO:0045787 | positive regulation of cell cycle                                                | -3.599428221 |
| GO:1904377 | positive regulation of protein localization to cell periphery                    | -3.591792775 |
| GO:0032770 | positive regulation of monooxygenase activity                                    | -3.376455779 |
| GO:0050999 | regulation of nitric-oxide synthase activity                                     | -3.026484409 |
| GO:0071364 | cellular response to epidermal growth factor stimulus                            | -2.996523184 |
| GO:0051341 | regulation of oxidoreductase activity                                            | -2.80986657  |
| GO:1900087 | positive regulation of G1/S transition of mitotic cell cycle                     | -2.686335833 |
| GO:0051353 | positive regulation of oxidoreductase activity                                   | -2.578150419 |
| GO:0045931 | positive regulation of mitotic cell cycle                                        | -2.529156705 |
| GO:1902808 | positive regulation of cell cycle G1/S phase transition                          | -2.423979776 |
| GO:0042058 | regulation of epidermal growth factor receptor signaling pathway                 | -2.337387332 |
| GO:1901184 | regulation of ERBB signaling pathway                                             | -2.241710754 |
| GO:1902893 | regulation of miRNA transcription                                                | -7.94820614  |
| GO:0001837 | epithelial to mesenchymal transition                                             | -7.142785982 |
| GO:0048762 | mesenchymal cell differentiation                                                 | -7.068576747 |
| GO:0060485 | mesenchyme development                                                           | -6.925294287 |
| GO:0030278 | regulation of ossification                                                       | -5.83521409  |
| GO:0003206 | cardiac chamber morphogenesis                                                    | -5.717245075 |
| GO:1902895 | positive regulation of miRNA transcription                                       | -5.660591272 |
| GO:0071560 | cellular response to transforming growth factor beta stimulus                    | -5.195738897 |
| GO:0071559 | response to transforming growth factor beta                                      | -5.066729504 |
| GO:0008544 | epidermis development                                                            | -4.946077483 |
| GO:0003205 | cardiac chamber development                                                      | -4.909904966 |
| GO:0060389 | pathway-restricted SMAD protein phosphorylation                                  | -4.389226998 |
| GO:0060412 | ventricular septum morphogenesis                                                 | -4.388971116 |

|            |                                                                        |              |
|------------|------------------------------------------------------------------------|--------------|
| GO:0010862 | positive regulation of pathway-restricted SMAD protein phosphorylation | -4.12259354  |
| GO:0045778 | positive regulation of ossification                                    | -3.956321576 |
| GO:0003007 | heart morphogenesis                                                    | -3.800924933 |
| GO:0055008 | cardiac muscle tissue morphogenesis                                    | -3.777465917 |
| GO:0060393 | regulation of pathway-restricted SMAD protein phosphorylation          | -3.722114756 |
| GO:0043588 | skin development                                                       | -3.706847735 |
| GO:0060317 | cardiac epithelial to mesenchymal transition                           | -3.550789691 |
| GO:0048565 | digestive tract development                                            | -3.520840466 |
| GO:0007435 | salivary gland morphogenesis                                           | -3.504816454 |
| GO:0060411 | cardiac septum morphogenesis                                           | -3.494919094 |
| GO:0003281 | ventricular septum development                                         | -3.448684857 |
| GO:0060415 | muscle tissue morphogenesis                                            | -3.448684857 |
| GO:0007431 | salivary gland development                                             | -3.417757237 |
| GO:0031069 | hair follicle morphogenesis                                            | -3.417757237 |
| GO:0061061 | muscle structure development                                           | -3.397024311 |
| GO:0001942 | hair follicle development                                              | -3.360223118 |
| GO:0055123 | digestive system development                                           | -3.340727355 |
| GO:0048644 | muscle organ morphogenesis                                             | -3.297108752 |
| GO:0022404 | molting cycle process                                                  | -3.2766443   |
| GO:0022405 | hair cycle process                                                     | -3.2766443   |
| GO:0098773 | skin epidermis development                                             | -3.2766443   |
| GO:0048730 | epidermis morphogenesis                                                | -3.26037759  |
| GO:1905207 | regulation of cardiocyte differentiation                               | -3.26037759  |
| GO:0060537 | muscle tissue development                                              | -3.246177213 |
| GO:0003203 | endocardial cushion morphogenesis                                      | -3.224038362 |
| GO:1905314 | semi-lunar valve development                                           | -3.057221553 |
| GO:0007179 | transforming growth factor beta receptor signaling pathway             | -3.033370362 |
| GO:0042303 | molting cycle                                                          | -3.033370362 |
| GO:0042633 | hair cycle                                                             | -3.033370362 |
| GO:0035272 | exocrine system development                                            | -2.996523184 |
| GO:0003197 | endocardial cushion development                                        | -2.910941679 |
| GO:0048738 | cardiac muscle tissue development                                      | -2.901835172 |
| GO:0055010 | ventricular cardiac muscle tissue morphogenesis                        | -2.883742534 |
| GO:0014706 | striated muscle tissue development                                     | -2.847476443 |
| GO:0003279 | cardiac septum development                                             | -2.839754762 |
| GO:0072132 | mesenchyme morphogenesis                                               | -2.780855605 |
| GO:0010718 | positive regulation of epithelial to mesenchymal transition            | -2.709251562 |
| GO:0003179 | heart valve morphogenesis                                              | -2.686335833 |
| GO:0003229 | ventricular cardiac muscle tissue development                          | -2.663866989 |
| GO:0007517 | muscle organ development                                               | -2.630942793 |
| GO:0003231 | cardiac ventricle development                                          | -2.5659631   |

|            |                                                                |              |
|------------|----------------------------------------------------------------|--------------|
| GO:0072175 | epithelial tube formation                                      | -2.517103536 |
| GO:0043583 | ear development                                                | -2.48481191  |
| GO:0003170 | heart valve development                                        | -2.479353688 |
| GO:1904888 | cranial skeletal system development                            | -2.371219039 |
| GO:0016331 | morphogenesis of embryonic epithelium                          | -2.369414538 |
| GO:0003208 | cardiac ventricle morphogenesis                                | -2.354174047 |
| GO:0035148 | tube formation                                                 | -2.337515912 |
| GO:0030509 | BMP signaling pathway                                          | -2.196841192 |
| GO:0001843 | neural tube closure                                            | -2.098876582 |
| GO:0060606 | tube closure                                                   | -2.08558614  |
| GO:0014020 | primary neural tube formation                                  | -2.021526278 |
| GO:0038083 | peptidyl-tyrosine autophosphorylation                          | -7.820043856 |
| GO:0044403 | biological process involved in symbiotic interaction           | -7.729973951 |
| GO:0051701 | biological process involved in interaction with host           | -3.203514987 |
| GO:0044409 | entry into host                                                | -2.80986657  |
| GO:0052126 | movement in host environment                                   | -2.458381135 |
| GO:0016032 | viral process                                                  | -2.240840068 |
| GO:0032642 | regulation of chemokine production                             | -7.798323649 |
| GO:0002886 | regulation of myeloid leukocyte mediated immunity              | -5.118712187 |
| GO:0032722 | positive regulation of chemokine production                    | -3.51857078  |
| GO:0043304 | regulation of mast cell degranulation                          | -3.376455779 |
| GO:0033006 | regulation of mast cell activation involved in immune response | -3.297846025 |
| GO:0033003 | regulation of mast cell activation                             | -2.938784718 |
| GO:0043300 | regulation of leukocyte degranulation                          | -2.83116673  |
| GO:1903305 | regulation of regulated secretory pathway                      | -2.402092399 |
| GO:0008202 | steroid metabolic process                                      | -7.569183404 |
| GO:1901615 | organic hydroxy compound metabolic process                     | -7.446637666 |
| GO:0016125 | sterol metabolic process                                       | -2.481567703 |
| GO:1901617 | organic hydroxy compound biosynthetic process                  | -2.106896887 |
| GO:0042542 | response to hydrogen peroxide                                  | -7.493811982 |
| GO:1990748 | cellular detoxification                                        | -6.251996584 |
| GO:0097237 | cellular response to toxic substance                           | -6.035538036 |
| GO:0009636 | response to toxic substance                                    | -5.934156    |
| GO:0098754 | detoxification                                                 | -5.582287344 |
| GO:0098869 | cellular oxidant detoxification                                | -5.430679991 |
| GO:0019430 | removal of superoxide radicals                                 | -4.58796101  |
| GO:0006801 | superoxide metabolic process                                   | -4.473943562 |
| GO:0071450 | cellular response to oxygen radical                            | -4.389226998 |
| GO:0071451 | cellular response to superoxide                                | -4.389226998 |
| GO:0051602 | response to electrical stimulus                                | -4.388971116 |
| GO:0000303 | response to superoxide                                         | -4.13991307  |
| GO:0000305 | response to oxygen radical                                     | -4.066733811 |
| GO:0007568 | aging                                                          | -3.93875277  |

|            |                                                                   |              |
|------------|-------------------------------------------------------------------|--------------|
| GO:0045454 | cell redox homeostasis                                            | -3.088773975 |
| GO:0014075 | response to amine                                                 | -2.996523184 |
| GO:0072593 | reactive oxygen species metabolic process                         | -2.965924416 |
| GO:0070301 | cellular response to hydrogen peroxide                            | -2.423979776 |
| GO:0046634 | regulation of alpha-beta T cell activation                        | -7.461725629 |
| GO:0043366 | beta selection                                                    | -7.029752835 |
| GO:0046632 | alpha-beta T cell differentiation                                 | -5.15558001  |
| GO:0046635 | positive regulation of alpha-beta T cell activation               | -4.814504723 |
| GO:1903706 | regulation of hemopoiesis                                         | -4.78726531  |
| GO:0046637 | regulation of alpha-beta T cell differentiation                   | -4.783424718 |
| GO:0046640 | regulation of alpha-beta T cell proliferation                     | -4.610387768 |
| GO:0046631 | alpha-beta T cell activation                                      | -4.523918936 |
| GO:1902105 | regulation of leukocyte differentiation                           | -4.064663945 |
| GO:0046641 | positive regulation of alpha-beta T cell proliferation            | -3.810653527 |
| GO:0045621 | positive regulation of lymphocyte differentiation                 | -3.536703187 |
| GO:0045619 | regulation of lymphocyte differentiation                          | -3.46390458  |
| GO:0045058 | T cell selection                                                  | -3.026484409 |
| GO:0045580 | regulation of T cell differentiation                              | -2.924085708 |
| GO:1902107 | positive regulation of leukocyte differentiation                  | -2.869006791 |
| GO:1903708 | positive regulation of hemopoiesis                                | -2.869006791 |
| GO:0046638 | positive regulation of alpha-beta T cell differentiation          | -2.805739715 |
| GO:0045582 | positive regulation of T cell differentiation                     | -2.737775421 |
| GO:0050848 | regulation of calcium-mediated signaling                          | -2.211592639 |
| GO:0051769 | regulation of nitric-oxide synthase biosynthetic process          | -7.449166496 |
| GO:0060416 | response to growth hormone                                        | -6.40147965  |
| GO:0051770 | positive regulation of nitric-oxide synthase biosynthetic process | -6.022842965 |
| GO:0060396 | growth hormone receptor signaling pathway                         | -3.997606803 |
| GO:0071378 | cellular response to growth hormone stimulus                      | -3.932113785 |
| GO:0007259 | receptor signaling pathway via JAK-STAT                           | -2.938784718 |
| GO:0097696 | receptor signaling pathway via STAT                               | -2.910941679 |
| GO:0009895 | negative regulation of catabolic process                          | -7.402572752 |
| GO:0031330 | negative regulation of cellular catabolic process                 | -4.456762875 |
| GO:0042177 | negative regulation of protein catabolic process                  | -3.536703187 |
| GO:0042176 | regulation of protein catabolic process                           | -3.301129466 |
| GO:1903362 | regulation of cellular protein catabolic process                  | -2.156155259 |
| GO:0009896 | positive regulation of catabolic process                          | -2.020137108 |
| GO:0015908 | fatty acid transport                                              | -7.386577474 |
| GO:0015909 | long-chain fatty acid transport                                   | -6.80384732  |
| GO:0010876 | lipid localization                                                | -5.258079936 |
| GO:0032309 | icosanoid secretion                                               | -5.170556276 |
| GO:0006869 | lipid transport                                                   | -4.779738372 |
| GO:0071715 | icosanoid transport                                               | -4.708150754 |

|            |                                                                              |              |
|------------|------------------------------------------------------------------------------|--------------|
| GO:0050482 | arachidonic acid secretion                                                   | -3.754114469 |
| GO:1903963 | arachidonate transport                                                       | -3.754114469 |
| GO:0015849 | organic acid transport                                                       | -3.656221621 |
| GO:0015718 | monocarboxylic acid transport                                                | -2.982496277 |
| GO:0097006 | regulation of plasma lipoprotein particle levels                             | -2.686335833 |
| GO:0061383 | trabecula morphogenesis                                                      | -7.301381528 |
| GO:0046620 | regulation of organ growth                                                   | -5.139858569 |
| GO:0061384 | heart trabecula morphogenesis                                                | -4.923165698 |
| GO:0055021 | regulation of cardiac muscle tissue growth                                   | -4.846083842 |
| GO:0048638 | regulation of developmental growth                                           | -4.663475562 |
| GO:0060420 | regulation of heart growth                                                   | -4.635014918 |
| GO:0060043 | regulation of cardiac muscle cell proliferation                              | -4.12259354  |
| GO:0060343 | trabecula formation                                                          | -3.810653527 |
| GO:0048705 | skeletal system morphogenesis                                                | -3.21662651  |
| GO:0032526 | response to retinoic acid                                                    | -2.795153446 |
| GO:0050918 | positive chemotaxis                                                          | -7.181790516 |
| GO:0045744 | negative regulation of G protein-coupled receptor signaling pathway          | -2.83116673  |
| GO:0008277 | regulation of G protein-coupled receptor signaling pathway                   | -2.435583723 |
| GO:0050680 | negative regulation of epithelial cell proliferation                         | -7.158434033 |
| GO:0001937 | negative regulation of endothelial cell proliferation                        | -3.381860332 |
| GO:0016525 | negative regulation of angiogenesis                                          | -3.203514987 |
| GO:2000181 | negative regulation of blood vessel morphogenesis                            | -3.177323238 |
| GO:1901343 | negative regulation of vasculature development                               | -3.164374566 |
| GO:0010827 | regulation of glucose transmembrane transport                                | -7.142785982 |
| GO:0034762 | regulation of transmembrane transport                                        | -6.921571184 |
| GO:0042593 | glucose homeostasis                                                          | -6.370790296 |
| GO:0033500 | carbohydrate homeostasis                                                     | -6.352864372 |
| GO:0010828 | positive regulation of glucose transmembrane transport                       | -5.758533407 |
| GO:0046324 | regulation of glucose import                                                 | -5.082513923 |
| GO:0034764 | positive regulation of transmembrane transport                               | -4.971688255 |
| GO:0046326 | positive regulation of glucose import                                        | -4.610387768 |
| GO:0001678 | cellular glucose homeostasis                                                 | -2.839754762 |
| GO:2001242 | regulation of intrinsic apoptotic signaling pathway                          | -7.002717175 |
| GO:0051881 | regulation of mitochondrial membrane potential                               | -6.038037251 |
| GO:2001243 | negative regulation of intrinsic apoptotic signaling pathway                 | -5.115152029 |
| GO:0010043 | response to zinc ion                                                         | -3.98821009  |
| GO:1902175 | regulation of oxidative stress-induced intrinsic apoptotic signaling pathway | -3.504816454 |
| GO:0010212 | response to ionizing radiation                                               | -3.312411372 |
| GO:0006974 | cellular response to DNA damage stimulus                                     | -3.286225761 |
| GO:0010332 | response to gamma radiation                                                  | -2.663866989 |
| GO:0008637 | apoptotic mitochondrial changes                                              | -2.598984718 |

|            |                                                                                                                                         |              |
|------------|-----------------------------------------------------------------------------------------------------------------------------------------|--------------|
| GO:0042391 | regulation of membrane potential                                                                                                        | -2.452269628 |
| GO:0097306 | cellular response to alcohol                                                                                                            | -2.021526278 |
| GO:0032680 | regulation of tumor necrosis factor production                                                                                          | -6.751470684 |
| GO:1903555 | regulation of tumor necrosis factor superfamily cytokine production                                                                     | -6.652116058 |
| GO:0032760 | positive regulation of tumor necrosis factor production                                                                                 | -5.066523799 |
| GO:1903557 | positive regulation of tumor necrosis factor superfamily cytokine production                                                            | -4.972265791 |
| GO:0032675 | regulation of interleukin-6 production                                                                                                  | -3.812816894 |
| GO:0032755 | positive regulation of interleukin-6 production                                                                                         | -2.982496277 |
| GO:0097066 | response to thyroid hormone                                                                                                             | -6.695815484 |
| GO:0097067 | cellular response to thyroid hormone stimulus                                                                                           | -4.217639664 |
| GO:0002244 | hematopoietic progenitor cell differentiation                                                                                           | -2.046685718 |
| GO:1900407 | regulation of cellular response to oxidative stress                                                                                     | -6.612902956 |
| GO:1902882 | regulation of response to oxidative stress                                                                                              | -6.337847294 |
| GO:1903201 | regulation of oxidative stress-induced cell death                                                                                       | -5.795729341 |
| GO:0048012 | hepatocyte growth factor receptor signaling pathway                                                                                     | -5.114221558 |
| GO:0001889 | liver development                                                                                                                       | -4.670193976 |
| GO:0061008 | hepaticobiliary system development                                                                                                      | -4.610433095 |
| GO:1903202 | negative regulation of oxidative stress-induced cell death                                                                              | -3.925064108 |
| GO:0010507 | negative regulation of autophagy                                                                                                        | -3.159399861 |
| GO:1901031 | regulation of response to reactive oxygen species                                                                                       | -3.088773975 |
| GO:0010803 | regulation of tumor necrosis factor-mediated signaling pathway                                                                          | -6.611511541 |
| GO:0032682 | negative regulation of chemokine production                                                                                             | -5.238651716 |
| GO:0071637 | regulation of monocyte chemotactic protein-1 production                                                                                 | -3.932113785 |
| GO:0010804 | negative regulation of tumor necrosis factor-mediated signaling pathway                                                                 | -3.550789691 |
| GO:0032652 | regulation of interleukin-1 production                                                                                                  | -3.474076902 |
| GO:0032651 | regulation of interleukin-1 beta production                                                                                             | -2.766174948 |
| GO:0032720 | negative regulation of tumor necrosis factor production                                                                                 | -2.272684787 |
| GO:1903556 | negative regulation of tumor necrosis factor superfamily cytokine production                                                            | -2.241710754 |
| GO:0051051 | negative regulation of transport                                                                                                        | -6.527692166 |
| GO:0051048 | negative regulation of secretion                                                                                                        | -2.946636282 |
| GO:1903828 | negative regulation of protein localization                                                                                             | -2.646438389 |
| GO:0050709 | negative regulation of protein secretion                                                                                                | -2.423979776 |
| GO:1903531 | negative regulation of secretion by cell                                                                                                | -2.337515912 |
| GO:1903522 | regulation of blood circulation                                                                                                         | -6.465940124 |
| GO:0002822 | regulation of adaptive immune response based on somatic recombination of immune receptors built from immunoglobulin superfamily domains | -5.782565661 |
| GO:0032660 | regulation of interleukin-17 production                                                                                                 | -5.613334692 |



|            |                                                                                                                                                  |              |
|------------|--------------------------------------------------------------------------------------------------------------------------------------------------|--------------|
| GO:0002819 | regulation of adaptive immune response                                                                                                           | -5.519312186 |
| GO:0032740 | positive regulation of interleukin-17 production                                                                                                 | -5.238651716 |
| GO:0045822 | negative regulation of heart contraction                                                                                                         | -5.238651716 |
| GO:1903523 | negative regulation of blood circulation                                                                                                         | -5.170556276 |
| GO:0008016 | regulation of heart contraction                                                                                                                  | -4.272513314 |
| GO:0002824 | positive regulation of adaptive immune response based on somatic recombination of immune receptors built from immunoglobulin superfamily domains | -3.774735282 |
| GO:0002821 | positive regulation of adaptive immune response                                                                                                  | -3.686108516 |
| GO:0032649 | regulation of interferon-gamma production                                                                                                        | -3.686108516 |
| GO:2000316 | regulation of T-helper 17 type immune response                                                                                                   | -3.460510079 |
| GO:0032729 | positive regulation of interferon-gamma production                                                                                               | -3.360223118 |
| GO:0007204 | positive regulation of cytosolic calcium ion concentration                                                                                       | -2.714008588 |
| GO:2000191 | regulation of fatty acid transport                                                                                                               | -6.40147965  |
| GO:0032890 | regulation of organic acid transport                                                                                                             | -6.038037251 |
| GO:0090237 | regulation of arachidonic acid secretion                                                                                                         | -5.28885554  |
| GO:0002532 | production of molecular mediator involved in inflammatory response                                                                               | -4.389226998 |
| GO:0044070 | regulation of anion transport                                                                                                                    | -4.224522423 |
| GO:0032303 | regulation of eicosanoid secretion                                                                                                               | -3.869898183 |
| GO:0042116 | macrophage activation                                                                                                                            | -2.663866989 |
| GO:0120161 | regulation of cold-induced thermogenesis                                                                                                         | -6.392483081 |
| GO:0120162 | positive regulation of cold-induced thermogenesis                                                                                                | -4.048220287 |
| GO:0045428 | regulation of nitric oxide biosynthetic process                                                                                                  | -6.390713081 |
| GO:0080164 | regulation of nitric oxide metabolic process                                                                                                     | -6.267311401 |
| GO:0045429 | positive regulation of nitric oxide biosynthetic process                                                                                         | -5.861421458 |
| GO:1904407 | positive regulation of nitric oxide metabolic process                                                                                            | -5.758533407 |
| GO:0009408 | response to heat                                                                                                                                 | -4.048220287 |
| GO:0009266 | response to temperature stimulus                                                                                                                 | -3.881845422 |
| GO:0046677 | response to antibiotic                                                                                                                           | -2.910941679 |
| GO:0034605 | cellular response to heat                                                                                                                        | -2.756492868 |
| GO:0031099 | regeneration                                                                                                                                     | -6.347703571 |
| GO:0031100 | animal organ regeneration                                                                                                                        | -4.910802172 |
| GO:0010821 | regulation of mitochondrion organization                                                                                                         | -6.32556126  |
| GO:0010506 | regulation of autophagy                                                                                                                          | -3.759449635 |
| GO:0010822 | positive regulation of mitochondrion organization                                                                                                | -3.381860332 |
| GO:0016241 | regulation of macroautophagy                                                                                                                     | -3.088663012 |
| GO:0010638 | positive regulation of organelle organization                                                                                                    | -6.236950521 |
| GO:0010310 | regulation of hydrogen peroxide metabolic process                                                                                                | -5.718752183 |
| GO:0071622 | regulation of granulocyte chemotaxis                                                                                                             | -5.43461533  |
| GO:0060491 | regulation of cell projection assembly                                                                                                           | -5.420383079 |
| GO:0051492 | regulation of stress fiber assembly                                                                                                              | -5.375014846 |
| GO:1902743 | regulation of lamellipodium organization                                                                                                         | -5.350857763 |

|            |                                                                         |              |
|------------|-------------------------------------------------------------------------|--------------|
| GO:0110020 | regulation of actomyosin structure organization                         | -5.139858569 |
| GO:0032231 | regulation of actin filament bundle assembly                            | -5.018907987 |
| GO:0120034 | positive regulation of plasma membrane bounded cell projection assembly | -5.018907987 |
| GO:0032970 | regulation of actin filament-based process                              | -4.7965876   |
| GO:1902745 | positive regulation of lamellipodium organization                       | -4.658536989 |
| GO:0031346 | positive regulation of cell projection organization                     | -4.531823314 |
| GO:0120035 | regulation of plasma membrane bounded cell projection organization      | -4.499126998 |
| GO:0120032 | regulation of plasma membrane bounded cell projection assembly          | -4.462460603 |
| GO:0051493 | regulation of cytoskeleton organization                                 | -4.46104278  |
| GO:0010591 | regulation of lamellipodium assembly                                    | -4.430899217 |
| GO:0031344 | regulation of cell projection organization                              | -4.386591869 |
| GO:0008360 | regulation of cell shape                                                | -4.135030735 |
| GO:0022604 | regulation of cell morphogenesis                                        | -4.064663945 |
| GO:0032956 | regulation of actin cytoskeleton organization                           | -3.599428221 |
| GO:0051495 | positive regulation of cytoskeleton organization                        | -3.557652995 |
| GO:0010592 | positive regulation of lamellipodium assembly                           | -3.550789691 |
| GO:0051497 | negative regulation of stress fiber assembly                            | -3.33651332  |
| GO:0090022 | regulation of neutrophil chemotaxis                                     | -3.33651332  |
| GO:0032232 | negative regulation of actin filament bundle assembly                   | -3.224038362 |
| GO:0030041 | actin filament polymerization                                           | -3.188764589 |
| GO:0032273 | positive regulation of protein polymerization                           | -3.068294072 |
| GO:0043277 | apoptotic cell clearance                                                | -2.967301303 |
| GO:1902622 | regulation of neutrophil migration                                      | -2.938784718 |
| GO:1902905 | positive regulation of supramolecular fiber organization                | -2.890820235 |
| GO:0007015 | actin filament organization                                             | -2.833565222 |
| GO:0051496 | positive regulation of stress fiber assembly                            | -2.780855605 |
| GO:0110053 | regulation of actin filament organization                               | -2.760818361 |
| GO:0007163 | establishment or maintenance of cell polarity                           | -2.63701341  |
| GO:0030865 | cortical cytoskeleton organization                                      | -2.578150419 |
| GO:0032233 | positive regulation of actin filament bundle assembly                   | -2.557690368 |
| GO:0008154 | actin polymerization or depolymerization                                | -2.517844054 |
| GO:0097435 | supramolecular fiber organization                                       | -2.416193952 |
| GO:0070507 | regulation of microtubule cytoskeleton organization                     | -2.256024321 |
| GO:0007264 | small GTPase mediated signal transduction                               | -2.142507837 |
| GO:0006897 | endocytosis                                                             | -2.09100555  |
| GO:1902903 | regulation of supramolecular fiber organization                         | -2.081987197 |
| GO:0051258 | protein polymerization                                                  | -2.00916892  |
| GO:1900076 | regulation of cellular response to insulin stimulus                     | -6.112049883 |
| GO:0031295 | T cell costimulation                                                    | -5.914876393 |
| GO:0031294 | lymphocyte costimulation                                                | -5.809329102 |

|            |                                                                                   |              |
|------------|-----------------------------------------------------------------------------------|--------------|
| GO:1900078 | positive regulation of cellular response to insulin stimulus                      | -5.309661703 |
| GO:0046626 | regulation of insulin receptor signaling pathway                                  | -4.814504723 |
| GO:0048011 | neurotrophin TRK receptor signaling pathway                                       | -4.58796101  |
| GO:0046628 | positive regulation of insulin receptor signaling pathway                         | -3.869898183 |
| GO:0038179 | neurotrophin signaling pathway                                                    | -3.648256523 |
| GO:0061515 | myeloid cell development                                                          | -3.51857078  |
| GO:0098751 | bone cell development                                                             | -3.460510079 |
| GO:0007229 | integrin-mediated signaling pathway                                               | -3.050728521 |
| GO:0045113 | regulation of integrin biosynthetic process                                       | -6.032669996 |
| GO:0051092 | positive regulation of NF-kappaB transcription factor activity                    | -2.256024321 |
| GO:0050818 | regulation of coagulation                                                         | -5.931152806 |
| GO:0050819 | negative regulation of coagulation                                                | -5.522002094 |
| GO:0030194 | positive regulation of blood coagulation                                          | -3.550789691 |
| GO:1900048 | positive regulation of hemostasis                                                 | -3.550789691 |
| GO:0030193 | regulation of blood coagulation                                                   | -3.542592824 |
| GO:0050820 | positive regulation of coagulation                                                | -3.504816454 |
| GO:1900046 | regulation of hemostasis                                                          | -3.494919094 |
| GO:0030195 | negative regulation of blood coagulation                                          | -2.938784718 |
| GO:1900047 | negative regulation of hemostasis                                                 | -2.910941679 |
| GO:0090303 | positive regulation of wound healing                                              | -2.517844054 |
| GO:0061041 | regulation of wound healing                                                       | -2.435583723 |
| GO:0061045 | negative regulation of wound healing                                              | -2.337387332 |
| GO:1903036 | positive regulation of response to wounding                                       | -2.272684787 |
| GO:1903034 | regulation of response to wounding                                                | -2.106896887 |
| GO:1903035 | negative regulation of response to wounding                                       | -2.098876582 |
| GO:0051054 | positive regulation of DNA metabolic process                                      | -5.911996219 |
| GO:2000573 | positive regulation of DNA biosynthetic process                                   | -4.6638091   |
| GO:0051972 | regulation of telomerase activity                                                 | -4.19429302  |
| GO:1904356 | regulation of telomere maintenance via telomere lengthening                       | -3.749544794 |
| GO:0051052 | regulation of DNA metabolic process                                               | -3.724493635 |
| GO:2000278 | regulation of DNA biosynthetic process                                            | -3.651827575 |
| GO:0051973 | positive regulation of telomerase activity                                        | -3.297846025 |
| GO:0032204 | regulation of telomere maintenance                                                | -2.933336161 |
| GO:0032210 | regulation of telomere maintenance via telomerase                                 | -2.732631226 |
| GO:0031647 | regulation of protein stability                                                   | -2.435986643 |
| GO:0010469 | regulation of signaling receptor activity                                         | -5.856980018 |
| GO:1902894 | negative regulation of miRNA transcription                                        | -4.066733811 |
| GO:0090287 | regulation of cellular response to growth factor stimulus                         | -3.830086401 |
| GO:0046320 | regulation of fatty acid oxidation                                                | -3.376455779 |
| GO:0043502 | regulation of muscle adaptation                                                   | -3.016215128 |
| GO:0030512 | negative regulation of transforming growth factor beta receptor signaling pathway | -2.949538981 |
| GO:1905562 | regulation of vascular endothelial cell proliferation                             | -2.883742534 |

|            |                                                                                                 |              |
|------------|-------------------------------------------------------------------------------------------------|--------------|
| GO:2000272 | negative regulation of signaling receptor activity                                              | -2.479353688 |
| GO:0010611 | regulation of cardiac muscle hypertrophy                                                        | -2.423979776 |
| GO:0014743 | regulation of muscle hypertrophy                                                                | -2.371219039 |
| GO:0017015 | regulation of transforming growth factor beta receptor signaling pathway                        | -2.327050591 |
| GO:1903844 | regulation of cellular response to transforming growth factor beta stimulus                     | -2.296141321 |
| GO:0090101 | negative regulation of transmembrane receptor protein serine/threonine kinase signaling pathway | -2.265939334 |
| GO:0045926 | negative regulation of growth                                                                   | -2.262796115 |
| GO:0000165 | MAPK cascade                                                                                    | -5.727971916 |
| GO:0031281 | positive regulation of cyclase activity                                                         | -4.05398091  |
| GO:0031098 | stress-activated protein kinase signaling cascade                                               | -3.591792775 |
| GO:0031279 | regulation of cyclase activity                                                                  | -3.317855103 |
| GO:0051403 | stress-activated MAPK cascade                                                                   | -2.517844054 |
| GO:0007610 | behavior                                                                                        | -5.618870018 |
| GO:0099177 | regulation of trans-synaptic signaling                                                          | -3.729103234 |
| GO:0007611 | learning or memory                                                                              | -3.646231472 |
| GO:0050890 | cognition                                                                                       | -3.262847539 |
| GO:0050804 | modulation of chemical synaptic transmission                                                    | -3.04344013  |
| GO:0014910 | regulation of smooth muscle cell migration                                                      | -5.606116233 |
| GO:0061098 | positive regulation of protein tyrosine kinase activity                                         | -3.956321576 |
| GO:0061097 | regulation of protein tyrosine kinase activity                                                  | -3.122282021 |
| GO:0070555 | response to interleukin-1                                                                       | -2.493310636 |
| GO:0035094 | response to nicotine                                                                            | -5.522002094 |
| GO:0071496 | cellular response to external stimulus                                                          | -4.889585467 |
| GO:0031668 | cellular response to extracellular stimulus                                                     | -4.758986389 |
| GO:0031669 | cellular response to nutrient levels                                                            | -4.246558691 |
| GO:0042594 | response to starvation                                                                          | -2.646438389 |
| GO:0009267 | cellular response to starvation                                                                 | -2.170028695 |
| GO:1901216 | positive regulation of neuron death                                                             | -5.48770807  |
| GO:0060322 | head development                                                                                | -4.786693947 |
| GO:0043525 | positive regulation of neuron apoptotic process                                                 | -4.02075444  |
| GO:0007420 | brain development                                                                               | -3.783237323 |
| GO:0030900 | forebrain development                                                                           | -2.766540644 |
| GO:0021537 | telencephalon development                                                                       | -2.255441216 |
| GO:0021543 | pallium development                                                                             | -2.124618421 |
| GO:0040013 | negative regulation of locomotion                                                               | -5.466721552 |
| GO:0002686 | negative regulation of leukocyte migration                                                      | -5.392301184 |
| GO:2000146 | negative regulation of cell motility                                                            | -4.989086224 |
| GO:0051271 | negative regulation of cellular component movement                                              | -4.910672    |
| GO:0030336 | negative regulation of cell migration                                                           | -4.32197564  |
| GO:0002689 | negative regulation of leukocyte chemotaxis                                                     | -3.810653527 |

|            |                                                                          |              |
|------------|--------------------------------------------------------------------------|--------------|
| GO:0050922 | negative regulation of chemotaxis                                        | -3.542592824 |
| GO:0003018 | vascular process in circulatory system                                   | -5.44076812  |
| GO:0009743 | response to carbohydrate                                                 | -4.653141911 |
| GO:0035296 | regulation of tube diameter                                              | -4.316407356 |
| GO:0097746 | blood vessel diameter maintenance                                        | -4.316407356 |
| GO:0035150 | regulation of tube size                                                  | -4.299276582 |
| GO:0034284 | response to monosaccharide                                               | -4.057383188 |
| GO:0090066 | regulation of anatomical structure size                                  | -3.326722883 |
| GO:0009749 | response to glucose                                                      | -3.257114236 |
| GO:0045777 | positive regulation of blood pressure                                    | -3.224038362 |
| GO:0009746 | response to hexose                                                       | -3.203514987 |
| GO:0042311 | vasodilation                                                             | -2.857159545 |
| GO:0019229 | regulation of vasoconstriction                                           | -2.498434788 |
| GO:0014823 | response to activity                                                     | -2.460590562 |
| GO:0097191 | extrinsic apoptotic signaling pathway                                    | -5.430679991 |
| GO:0007005 | mitochondrion organization                                               | -3.773797276 |
| GO:0038034 | signal transduction in absence of ligand                                 | -3.550789691 |
| GO:0097192 | extrinsic apoptotic signaling pathway in absence of ligand               | -3.550789691 |
| GO:0007006 | mitochondrial membrane organization                                      | -2.642648247 |
| GO:0046902 | regulation of mitochondrial membrane permeability                        | -2.537592175 |
| GO:0006839 | mitochondrial transport                                                  | -2.296141321 |
| GO:0090559 | regulation of membrane permeability                                      | -2.272684787 |
| GO:0032872 | regulation of stress-activated MAPK cascade                              | -5.420383079 |
| GO:0070302 | regulation of stress-activated protein kinase signaling cascade          | -5.37217153  |
| GO:1901224 | positive regulation of NIK/NF-kappaB signaling                           | -3.591792775 |
| GO:1901222 | regulation of NIK/NF-kappaB signaling                                    | -2.780590493 |
| GO:0032874 | positive regulation of stress-activated MAPK cascade                     | -2.493310636 |
| GO:0070304 | positive regulation of stress-activated protein kinase signaling cascade | -2.469925039 |
| GO:0046328 | regulation of JNK cascade                                                | -2.380218931 |
| GO:2001026 | regulation of endothelial cell chemotaxis                                | -5.383841545 |
| GO:2001028 | positive regulation of endothelial cell chemotaxis                       | -4.389226998 |
| GO:0003158 | endothelium development                                                  | -3.033370362 |
| GO:0045446 | endothelial cell differentiation                                         | -2.257088005 |
| GO:0045598 | regulation of fat cell differentiation                                   | -5.371707728 |
| GO:0045600 | positive regulation of fat cell differentiation                          | -4.846083842 |
| GO:0006006 | glucose metabolic process                                                | -4.027298015 |
| GO:0061448 | connective tissue development                                            | -3.363427185 |
| GO:0019318 | hexose metabolic process                                                 | -3.312411372 |
| GO:0005996 | monosaccharide metabolic process                                         | -3.052026281 |
| GO:0005975 | carbohydrate metabolic process                                           | -2.924996159 |
| GO:0046622 | positive regulation of organ growth                                      | -2.756492868 |
| GO:0051216 | cartilage development                                                    | -2.226722372 |

|            |                                                                  |              |
|------------|------------------------------------------------------------------|--------------|
| GO:0019395 | fatty acid oxidation                                             | -2.18228809  |
| GO:0042692 | muscle cell differentiation                                      | -2.149315443 |
| GO:0048639 | positive regulation of developmental growth                      | -2.115726801 |
| GO:0034440 | lipid oxidation                                                  | -2.11233501  |
| GO:0030258 | lipid modification                                               | -2.046755222 |
| GO:0120254 | olefinic compound metabolic process                              | -5.331557269 |
| GO:0006720 | isoprenoid metabolic process                                     | -4.816174602 |
| GO:0034754 | cellular hormone metabolic process                               | -4.590863974 |
| GO:0006721 | terpenoid metabolic process                                      | -4.069378208 |
| GO:0001523 | retinoid metabolic process                                       | -3.236533122 |
| GO:0006066 | alcohol metabolic process                                        | -3.188840502 |
| GO:0008210 | estrogen metabolic process                                       | -3.188764589 |
| GO:0016101 | diterpenoid metabolic process                                    | -3.178312401 |
| GO:0042572 | retinol metabolic process                                        | -2.780855605 |
| GO:0019369 | arachidonic acid metabolic process                               | -2.620206303 |
| GO:0034308 | primary alcohol metabolic process                                | -2.021526278 |
| GO:0035821 | modulation of process of another organism                        | -5.309661703 |
| GO:0051709 | regulation of killing of cells of another organism               | -5.28885554  |
| GO:0032757 | positive regulation of interleukin-8 production                  | -2.537592175 |
| GO:0048678 | response to axon injury                                          | -5.231422398 |
| GO:0031103 | axon regeneration                                                | -3.700049736 |
| GO:0031102 | neuron projection regeneration                                   | -3.417757237 |
| GO:0071695 | anatomical structure maturation                                  | -5.217124323 |
| GO:0021700 | developmental maturation                                         | -4.695771097 |
| GO:0048469 | cell maturation                                                  | -3.02803249  |
| GO:0009615 | response to virus                                                | -5.204578903 |
| GO:0032481 | positive regulation of type I interferon production              | -5.012035481 |
| GO:0098586 | cellular response to virus                                       | -4.156468705 |
| GO:0032479 | regulation of type I interferon production                       | -3.926057035 |
| GO:0050691 | regulation of defense response to virus by host                  | -3.026484409 |
| GO:0050688 | regulation of defense response to virus                          | -2.320851758 |
| GO:0048010 | vascular endothelial growth factor receptor signaling pathway    | -4.981623907 |
| GO:0035924 | cellular response to vascular endothelial growth factor stimulus | -4.12259354  |
| GO:0002040 | sprouting angiogenesis                                           | -3.805895085 |
| GO:0050927 | positive regulation of positive chemotaxis                       | -3.700049736 |
| GO:0050926 | regulation of positive chemotaxis                                | -3.648256523 |
| GO:0043491 | protein kinase B signaling                                       | -3.154497773 |
| GO:0001894 | tissue homeostasis                                               | -4.87660039  |
| GO:0060249 | anatomical structure homeostasis                                 | -4.344848908 |
| GO:0048871 | multicellular organismal homeostasis                             | -4.331183651 |
| GO:0048873 | homeostasis of number of cells within a tissue                   | -3.504816454 |
| GO:0061035 | regulation of cartilage development                              | -3.494919094 |

|            |                                                                     |              |
|------------|---------------------------------------------------------------------|--------------|
| GO:0061037 | negative regulation of cartilage development                        | -3.460510079 |
| GO:0071675 | regulation of mononuclear cell migration                            | -4.773488546 |
| GO:2000401 | regulation of lymphocyte migration                                  | -3.668664214 |
| GO:0071677 | positive regulation of mononuclear cell migration                   | -3.616994367 |
| GO:0044319 | wound healing, spreading of cells                                   | -3.550789691 |
| GO:0090505 | epiboly involved in wound healing                                   | -3.550789691 |
| GO:0090504 | epiboly                                                             | -3.504816454 |
| GO:2000406 | positive regulation of T cell migration                             | -3.417757237 |
| GO:2000403 | positive regulation of lymphocyte migration                         | -3.188764589 |
| GO:2000404 | regulation of T cell migration                                      | -2.938784718 |
| GO:0002011 | morphogenesis of an epithelial sheet                                | -2.780855605 |
| GO:0001961 | positive regulation of cytokine-mediated signaling pathway          | -2.620206303 |
| GO:0060760 | positive regulation of response to cytokine stimulus                | -2.479353688 |
| GO:0071402 | cellular response to lipoprotein particle stimulus                  | -4.708150754 |
| GO:0036294 | cellular response to decreased oxygen levels                        | -4.333673944 |
| GO:0071453 | cellular response to oxygen levels                                  | -4.088104713 |
| GO:0071456 | cellular response to hypoxia                                        | -3.443567003 |
| GO:0055094 | response to lipoprotein particle                                    | -3.376455779 |
| GO:0042476 | odontogenesis                                                       | -4.690475264 |
| GO:0045747 | positive regulation of Notch signaling pathway                      | -4.158040881 |
| GO:0008593 | regulation of Notch signaling pathway                               | -4.069378208 |
| GO:0032570 | response to progesterone                                            | -3.121184104 |
| GO:0032147 | activation of protein kinase activity                               | -2.446934511 |
| GO:1902117 | positive regulation of organelle assembly                           | -2.226547429 |
| GO:0045216 | cell-cell junction organization                                     | -2.080770104 |
| GO:0002833 | positive regulation of response to biotic stimulus                  | -4.622828939 |
| GO:0002861 | regulation of inflammatory response to antigenic stimulus           | -4.269357534 |
| GO:0038094 | Fc-gamma receptor signaling pathway                                 | -3.550789691 |
| GO:0002862 | negative regulation of inflammatory response to antigenic stimulus  | -3.417757237 |
| GO:0045089 | positive regulation of innate immune response                       | -3.270775606 |
| GO:0034103 | regulation of tissue remodeling                                     | -3.178312401 |
| GO:0002218 | activation of innate immune response                                | -2.517844054 |
| GO:1900015 | regulation of cytokine production involved in inflammatory response | -4.606640009 |
| GO:1900371 | regulation of purine nucleotide biosynthetic process                | -4.348104665 |
| GO:0030808 | regulation of nucleotide biosynthetic process                       | -4.308249183 |
| GO:0045776 | negative regulation of blood pressure                               | -4.12259354  |
| GO:0030810 | positive regulation of nucleotide biosynthetic process              | -3.648256523 |
| GO:1900373 | positive regulation of purine nucleotide biosynthetic process       | -3.648256523 |
| GO:0007623 | circadian rhythm                                                    | -3.443567003 |
| GO:0043467 | regulation of generation of precursor metabolites and energy        | -3.384072629 |
| GO:0019932 | second-messenger-mediated signaling                                 | -3.299163339 |

|            |                                                                              |              |
|------------|------------------------------------------------------------------------------|--------------|
| GO:1900542 | regulation of purine nucleotide metabolic process                            | -3.122282021 |
| GO:1900016 | negative regulation of cytokine production involved in inflammatory response | -3.121184104 |
| GO:0006140 | regulation of nucleotide metabolic process                                   | -3.08607163  |
| GO:0045981 | positive regulation of nucleotide metabolic process                          | -2.883742534 |
| GO:1900544 | positive regulation of purine nucleotide metabolic process                   | -2.883742534 |
| GO:0044344 | cellular response to fibroblast growth factor stimulus                       | -4.523918936 |
| GO:0060602 | branch elongation of an epithelium                                           | -4.389226998 |
| GO:0071774 | response to fibroblast growth factor                                         | -4.368389267 |
| GO:0051781 | positive regulation of cell division                                         | -4.178883093 |
| GO:0008543 | fibroblast growth factor receptor signaling pathway                          | -4.12259354  |
| GO:0003401 | axis elongation                                                              | -3.810653527 |
| GO:0051302 | regulation of cell division                                                  | -3.618529669 |
| GO:0060560 | developmental growth involved in morphogenesis                               | -2.669176887 |
| GO:0030901 | midbrain development                                                         | -2.15375782  |
| GO:0035303 | regulation of dephosphorylation                                              | -4.514268992 |
| GO:0010921 | regulation of phosphatase activity                                           | -4.368389267 |
| GO:0010923 | negative regulation of phosphatase activity                                  | -3.188764589 |
| GO:0035305 | negative regulation of dephosphorylation                                     | -2.857159545 |
| GO:0043666 | regulation of phosphoprotein phosphatase activity                            | -2.598984718 |
| GO:0035304 | regulation of protein dephosphorylation                                      | -2.07245992  |
| GO:0003376 | sphingosine-1-phosphate receptor signaling pathway                           | -4.389226998 |
| GO:0090520 | sphingolipid mediated signaling pathway                                      | -4.300505605 |
| GO:0045730 | respiratory burst                                                            | -3.754114469 |
| GO:0048015 | phosphatidylinositol-mediated signaling                                      | -3.426082434 |
| GO:0048017 | inositol lipid-mediated signaling                                            | -3.338890684 |
| GO:0014065 | phosphatidylinositol 3-kinase signaling                                      | -3.154497773 |
| GO:0050994 | regulation of lipid catabolic process                                        | -2.557690368 |
| GO:0051057 | positive regulation of small GTPase mediated signal transduction             | -2.388529752 |
| GO:0051591 | response to cAMP                                                             | -2.098876582 |
| GO:0048286 | lung alveolus development                                                    | -4.308249183 |
| GO:0009791 | post-embryonic development                                                   | -4.29510201  |
| GO:0045165 | cell fate commitment                                                         | -3.865865554 |
| GO:0002053 | positive regulation of mesenchymal cell proliferation                        | -3.810653527 |
| GO:0010464 | regulation of mesenchymal cell proliferation                                 | -3.504816454 |
| GO:0030177 | positive regulation of Wnt signaling pathway                                 | -4.26541474  |
| GO:0030111 | regulation of Wnt signaling pathway                                          | -3.785702121 |
| GO:0060828 | regulation of canonical Wnt signaling pathway                                | -3.686460818 |
| GO:0090263 | positive regulation of canonical Wnt signaling pathway                       | -2.795153446 |
| GO:0035306 | positive regulation of dephosphorylation                                     | -2.557690368 |
| GO:0070613 | regulation of protein processing                                             | -2.423979776 |
| GO:1903317 | regulation of protein maturation                                             | -2.371219039 |



|            |                                                                        |              |
|------------|------------------------------------------------------------------------|--------------|
| GO:0010463 | mesenchymal cell proliferation                                         | -4.217639664 |
| GO:0051147 | regulation of muscle cell differentiation                              | -4.027098125 |
| GO:0033688 | regulation of osteoblast proliferation                                 | -3.550789691 |
| GO:0045667 | regulation of osteoblast differentiation                               | -3.369505739 |
| GO:0031214 | biomineral tissue development                                          | -3.016215128 |
| GO:0110148 | biomineralization                                                      | -2.933336161 |
| GO:0062014 | negative regulation of small molecule metabolic process                | -2.901463698 |
| GO:0030282 | bone mineralization                                                    | -2.756492868 |
| GO:0002065 | columnar/cuboidal epithelial cell differentiation                      | -2.226547429 |
| GO:0051153 | regulation of striated muscle cell differentiation                     | -2.00916892  |
| GO:1904035 | regulation of epithelial cell apoptotic process                        | -4.134316611 |
| GO:1904036 | negative regulation of epithelial cell apoptotic process               | -4.02075444  |
| GO:0090049 | regulation of cell migration involved in sprouting angiogenesis        | -2.257088005 |
| GO:0043279 | response to alkaloid                                                   | -4.069378208 |
| GO:0051402 | neuron apoptotic process                                               | -3.98821009  |
| GO:0070997 | neuron death                                                           | -3.749544794 |
| GO:0071312 | cellular response to alkaloid                                          | -3.224038362 |
| GO:0051900 | regulation of mitochondrial depolarization                             | -4.066733811 |
| GO:0033143 | regulation of intracellular steroid hormone receptor signaling pathway | -3.471627169 |
| GO:0033146 | regulation of intracellular estrogen receptor signaling pathway        | -3.26037759  |
| GO:0051385 | response to mineralocorticoid                                          | -3.224038362 |
| GO:0003254 | regulation of membrane depolarization                                  | -2.883742534 |
| GO:2000243 | positive regulation of reproductive process                            | -2.15375782  |
| GO:0006509 | membrane protein ectodomain proteolysis                                | -3.932113785 |
| GO:0033619 | membrane protein proteolysis                                           | -3.26037759  |
| GO:1904996 | positive regulation of leukocyte adhesion to vascular endothelial cell | -3.754114469 |
| GO:1904994 | regulation of leukocyte adhesion to vascular endothelial cell          | -3.121184104 |
| GO:0045666 | positive regulation of neuron differentiation                          | -2.07245992  |
| GO:0001816 | cytokine production                                                    | -3.700049736 |
| GO:0032663 | regulation of interleukin-2 production                                 | -3.695159677 |
| GO:1901361 | organic cyclic compound catabolic process                              | -3.48795999  |
| GO:0032743 | positive regulation of interleukin-2 production                        | -3.297846025 |
| GO:0009187 | cyclic nucleotide metabolic process                                    | -3.121184104 |
| GO:0009154 | purine ribonucleotide catabolic process                                | -2.967301303 |
| GO:1901136 | carbohydrate derivative catabolic process                              | -2.946636282 |
| GO:0006937 | regulation of muscle contraction                                       | -2.912923376 |
| GO:0006195 | purine nucleotide catabolic process                                    | -2.857159545 |
| GO:0009261 | ribonucleotide catabolic process                                       | -2.805739715 |
| GO:0072523 | purine-containing compound catabolic process                           | -2.732631226 |
| GO:1904062 | regulation of cation transmembrane transport                           | -2.721103078 |
| GO:0072521 | purine-containing compound metabolic process                           | -2.682984695 |

|            |                                                          |              |
|------------|----------------------------------------------------------|--------------|
| GO:0055086 | nucleobase-containing small molecule metabolic process   | -2.478683494 |
| GO:0032409 | regulation of transporter activity                       | -2.442581589 |
| GO:0046700 | heterocycle catabolic process                            | -2.435986643 |
| GO:0044270 | cellular nitrogen compound catabolic process             | -2.396948386 |
| GO:0019439 | aromatic compound catabolic process                      | -2.297095376 |
| GO:0009166 | nucleotide catabolic process                             | -2.288506924 |
| GO:0055117 | regulation of cardiac muscle contraction                 | -2.272684787 |
| GO:0046434 | organophosphate catabolic process                        | -2.256024321 |
| GO:0009150 | purine ribonucleotide metabolic process                  | -2.237630331 |
| GO:0006163 | purine nucleotide metabolic process                      | -2.163462315 |
| GO:1901292 | nucleoside phosphate catabolic process                   | -2.15375782  |
| GO:0009259 | ribonucleotide metabolic process                         | -2.130362987 |
| GO:0019693 | ribose phosphate metabolic process                       | -2.076703732 |
| GO:0034765 | regulation of ion transmembrane transport                | -2.064071376 |
| GO:1903169 | regulation of calcium ion transmembrane transport        | -2.046755222 |
| GO:0006942 | regulation of striated muscle contraction                | -2.00916892  |
| GO:0010812 | negative regulation of cell-substrate adhesion           | -3.616994367 |
| GO:0001953 | negative regulation of cell-matrix adhesion              | -3.088773975 |
| GO:0006606 | protein import into nucleus                              | -2.80986657  |
| GO:0051170 | import into nucleus                                      | -2.751904129 |
| GO:0034504 | protein localization to nucleus                          | -2.0383936   |
| GO:0042063 | gliogenesis                                              | -3.341772505 |
| GO:0051651 | maintenance of location in cell                          | -3.050728521 |
| GO:0010001 | glial cell differentiation                               | -2.981040543 |
| GO:0048708 | astrocyte differentiation                                | -2.756492868 |
| GO:0051235 | maintenance of location                                  | -2.188651941 |
| GO:0036314 | response to sterol                                       | -3.33651332  |
| GO:0031670 | cellular response to nutrient                            | -3.297846025 |
| GO:0032092 | positive regulation of protein binding                   | -3.216873055 |
| GO:0060284 | regulation of cell development                           | -2.657461249 |
| GO:0051960 | regulation of nervous system development                 | -2.360055011 |
| GO:0034763 | negative regulation of transmembrane transport           | -2.265939334 |
| GO:0006775 | fat-soluble vitamin metabolic process                    | -3.154497773 |
| GO:0006766 | vitamin metabolic process                                | -2.933336161 |
| GO:0019882 | antigen processing and presentation                      | -3.050728521 |
| GO:0019884 | antigen processing and presentation of exogenous antigen | -2.883742534 |
| GO:0048002 | antigen processing and presentation of peptide antigen   | -2.578150419 |
| GO:0051150 | regulation of smooth muscle cell differentiation         | -2.996523184 |
| GO:0051149 | positive regulation of muscle cell differentiation       | -2.18228809  |
| GO:0002221 | pattern recognition receptor signaling pathway           | -2.982496277 |
| GO:0002224 | toll-like receptor signaling pathway                     | -2.620206303 |
| GO:0050830 | defense response to Gram-positive bacterium              | -2.80986657  |
| GO:0016042 | lipid catabolic process                                  | -2.706192581 |

|            |                                                |              |
|------------|------------------------------------------------|--------------|
| GO:0006091 | generation of precursor metabolites and energy | -2.014676917 |
| GO:0045911 | positive regulation of DNA recombination       | -2.371219039 |
| GO:0018958 | phenol-containing compound metabolic process   | -2.098876582 |

### Cellular Component

| ID         | Description                                                | LogP     |
|------------|------------------------------------------------------------|----------|
| GO:0031983 | vesicle lumen                                              | -17.5176 |
| GO:0034774 | secretory granule lumen                                    | -16.4092 |
| GO:0060205 | cytoplasmic vesicle lumen                                  | -16.331  |
| GO:0005775 | vacuolar lumen                                             | -10.528  |
| GO:0000323 | lytic vacuole                                              | -7.28795 |
| GO:0005764 | lysosome                                                   | -7.28795 |
| GO:0035578 | azurophil granule lumen                                    | -6.67796 |
| GO:0005766 | primary lysosome                                           | -5.12123 |
| GO:0042582 | azurophil granule                                          | -5.12123 |
| GO:0031012 | extracellular matrix                                       | -13.7138 |
| GO:0030312 | external encapsulating structure                           | -13.6983 |
| GO:0062023 | collagen-containing extracellular matrix                   | -10.8461 |
| GO:0045121 | membrane raft                                              | -12.7472 |
| GO:0098857 | membrane microdomain                                       | -12.7256 |
| GO:0005901 | caveola                                                    | -4.41885 |
| GO:0044853 | plasma membrane raft                                       | -3.75666 |
| GO:0101002 | ficolin-1-rich granule                                     | -11.4699 |
| GO:1904813 | ficolin-1-rich granule lumen                               | -9.52385 |
| GO:0070820 | tertiary granule                                           | -7.15843 |
| GO:1904724 | tertiary granule lumen                                     | -5.27045 |
| GO:0043235 | receptor complex                                           | -10.1786 |
| GO:0098797 | plasma membrane protein complex                            | -3.96607 |
| GO:0098802 | plasma membrane signaling receptor complex                 | -2.44258 |
| GO:0098552 | side of membrane                                           | -8.60496 |
| GO:0009897 | external side of plasma membrane                           | -5.0347  |
| GO:0005925 | focal adhesion                                             | -8.03242 |
| GO:0030055 | cell-substrate junction                                    | -7.9169  |
| GO:0031234 | extrinsic component of cytoplasmic side of plasma membrane | -6.42649 |
| GO:0019897 | extrinsic component of plasma membrane                     | -5.91406 |
| GO:0009898 | cytoplasmic side of plasma membrane                        | -5.85698 |
| GO:0019898 | extrinsic component of membrane                            | -5.70824 |
| GO:0098562 | cytoplasmic side of membrane                               | -5.32476 |
| GO:0032587 | ruffle membrane                                            | -4.06938 |
| GO:0031256 | leading edge membrane                                      | -3.78583 |

|            |                                                   |          |
|------------|---------------------------------------------------|----------|
| GO:0005884 | actin filament                                    | -3.75666 |
| GO:0031252 | cell leading edge                                 | -3.16184 |
| GO:0031253 | cell projection membrane                          | -3.00338 |
| GO:0001726 | ruffle                                            | -2.86901 |
| GO:0030027 | lamellipodium                                     | -2.61833 |
| GO:0005938 | cell cortex                                       | -2.50997 |
| GO:0098978 | glutamatergic synapse                             | -2.4492  |
| GO:0098794 | postsynapse                                       | -2.13144 |
| GO:0072562 | blood microparticle                               | -6.39248 |
| GO:0005788 | endoplasmic reticulum lumen                       | -4.01597 |
| GO:0030139 | endocytic vesicle                                 | -6.27099 |
| GO:0045335 | phagocytic vesicle                                | -4.36862 |
| GO:0036021 | endolysosome lumen                                | -6.03267 |
| GO:0031904 | endosome lumen                                    | -4.70815 |
| GO:0043202 | lysosomal lumen                                   | -4.06938 |
| GO:0036019 | endolysosome                                      | -3.55079 |
| GO:0045177 | apical part of cell                               | -3.08874 |
| GO:0016324 | apical plasma membrane                            | -2.19158 |
| GO:0031091 | platelet alpha granule                            | -5.40268 |
| GO:0031093 | platelet alpha granule lumen                      | -4.84608 |
| GO:0042581 | specific granule                                  | -5.03103 |
| GO:0035580 | specific granule lumen                            | -5.01204 |
| GO:0030667 | secretory granule membrane                        | -4.84515 |
| GO:0101003 | ficolin-1-rich granule membrane                   | -2.55769 |
| GO:1904090 | peptidase inhibitor complex                       | -4.82393 |
| GO:0005911 | cell-cell junction                                | -4.68334 |
| GO:0048471 | perinuclear region of cytoplasm                   | -4.54991 |
| GO:0001772 | immunological synapse                             | -4.30825 |
| GO:0005667 | transcription regulator complex                   | -4.01115 |
| GO:0090575 | RNA polymerase II transcription regulator complex | -2.28508 |
| GO:0030425 | dendrite                                          | -2.69001 |
| GO:0097447 | dendritic tree                                    | -2.68046 |
| GO:0005813 | centrosome                                        | -2.64737 |
| GO:0005741 | mitochondrial outer membrane                      | -2.59071 |
| GO:0031968 | organelle outer membrane                          | -2.36186 |
| GO:0019867 | outer membrane                                    | -2.34619 |
| GO:0000791 | euchromatin                                       | -2.53759 |
| GO:0009925 | basal plasma membrane                             | -2.21206 |
| GO:0045178 | basal part of cell                                | -2.08918 |

## Molecular Function

| ID         | Description                                                              | LogP     |
|------------|--------------------------------------------------------------------------|----------|
| GO:0004175 | endopeptidase activity                                                   | -24.7553 |
| GO:0008236 | serine-type peptidase activity                                           | -23.8807 |
| GO:0017171 | serine hydrolase activity                                                | -23.6786 |
| GO:0004252 | serine-type endopeptidase activity                                       | -23.285  |
| GO:0008233 | peptidase activity                                                       | -21.776  |
| GO:0008237 | metallopeptidase activity                                                | -9.0039  |
| GO:0004222 | metalloendopeptidase activity                                            | -8.60841 |
| GO:0004879 | nuclear receptor activity                                                | -22.8528 |
| GO:0098531 | ligand-activated transcription factor activity                           | -22.8528 |
| GO:0005496 | steroid binding                                                          | -14.9671 |
| GO:0003707 | nuclear steroid receptor activity                                        | -10.9364 |
| GO:0061629 | RNA polymerase II-specific DNA-binding transcription factor binding      | -9.08809 |
| GO:0016922 | nuclear receptor binding                                                 | -7.78095 |
| GO:0001223 | transcription coactivator binding                                        | -7.55947 |
| GO:0140297 | DNA-binding transcription factor binding                                 | -7.43518 |
| GO:0001221 | transcription coregulator binding                                        | -7.39852 |
| GO:0008134 | transcription factor binding                                             | -6.98694 |
| GO:0046965 | nuclear retinoid X receptor binding                                      | -6.2612  |
| GO:0042974 | nuclear retinoic acid receptor binding                                   | -5.38384 |
| GO:0008013 | beta-catenin binding                                                     | -3.17831 |
| GO:0001222 | transcription corepressor binding                                        | -2.9673  |
| GO:0001228 | DNA-binding transcription activator activity, RNA polymerase II-specific | -2.877   |
| GO:0001216 | DNA-binding transcription activator activity                             | -2.8534  |
| GO:0008289 | lipid binding                                                            | -22.739  |
| GO:0004712 | protein serine/threonine/tyrosine kinase activity                        | -18.2328 |
| GO:0004672 | protein kinase activity                                                  | -18.0806 |
| GO:0016773 | phosphotransferase activity, alcohol group as acceptor                   | -16.2194 |
| GO:0004713 | protein tyrosine kinase activity                                         | -16.1053 |
| GO:0016301 | kinase activity                                                          | -15.3904 |
| GO:0019199 | transmembrane receptor protein kinase activity                           | -8.51187 |
| GO:0004714 | transmembrane receptor protein tyrosine kinase activity                  | -7.94821 |
| GO:0019838 | growth factor binding                                                    | -3.44357 |
| GO:0031406 | carboxylic acid binding                                                  | -13.1642 |
| GO:0033293 | monocarboxylic acid binding                                              | -9.88006 |
| GO:0043177 | organic acid binding                                                     | -8.97441 |
| GO:0005504 | fatty acid binding                                                       | -8.58289 |
| GO:0036041 | long-chain fatty acid binding                                            | -6.2612  |

|            |                                                                                                                                                                                             |          |
|------------|---------------------------------------------------------------------------------------------------------------------------------------------------------------------------------------------|----------|
| GO:0019900 | kinase binding                                                                                                                                                                              | -12.9316 |
| GO:0019901 | protein kinase binding                                                                                                                                                                      | -12.0797 |
| GO:0019904 | protein domain specific binding                                                                                                                                                             | -6.19417 |
| GO:0004715 | non-membrane spanning protein tyrosine kinase activity                                                                                                                                      | -10.5382 |
| GO:0016004 | phospholipase activator activity                                                                                                                                                            | -8.44508 |
| GO:0060229 | lipase activator activity                                                                                                                                                                   | -7.95978 |
| GO:0043274 | phospholipase binding                                                                                                                                                                       | -7.23393 |
| GO:0042169 | SH2 domain binding                                                                                                                                                                          | -5.91488 |
| GO:0043548 | phosphatidylinositol 3-kinase binding                                                                                                                                                       | -3.50482 |
| GO:0008047 | enzyme activator activity                                                                                                                                                                   | -2.39269 |
| GO:0008022 | protein C-terminus binding                                                                                                                                                                  | -2.03009 |
| GO:0005126 | cytokine receptor binding                                                                                                                                                                   | -10.4917 |
| GO:0001664 | G protein-coupled receptor binding                                                                                                                                                          | -3.42802 |
| GO:0042379 | chemokine receptor binding                                                                                                                                                                  | -2.37122 |
| GO:0019902 | phosphatase binding                                                                                                                                                                         | -10.0028 |
| GO:0019903 | protein phosphatase binding                                                                                                                                                                 | -7.54364 |
| GO:0030235 | nitric-oxide synthase regulator activity                                                                                                                                                    | -7.83992 |
| GO:0051117 | ATPase binding                                                                                                                                                                              | -6.99131 |
| GO:0030331 | nuclear estrogen receptor binding                                                                                                                                                           | -3.12118 |
| GO:0020037 | heme binding                                                                                                                                                                                | -7.78095 |
| GO:0046906 | tetrapyrrole binding                                                                                                                                                                        | -7.51825 |
| GO:0004497 | monooxygenase activity                                                                                                                                                                      | -5.09071 |
| GO:0016712 | oxidoreductase activity, acting on paired donors, with incorporation or reduction of molecular oxygen, reduced flavin or flavoprotein as one donor, and incorporation of one atom of oxygen | -4.47394 |
| GO:0016491 | oxidoreductase activity                                                                                                                                                                     | -4.4579  |
| GO:0016705 | oxidoreductase activity, acting on paired donors, with incorporation or reduction of molecular oxygen                                                                                       | -3.77247 |
| GO:0070330 | aromatase activity                                                                                                                                                                          | -3.70005 |
| GO:0008395 | steroid hydroxylase activity                                                                                                                                                                | -3.1545  |
| GO:0005506 | iron ion binding                                                                                                                                                                            | -2.286   |
| GO:0042803 | protein homodimerization activity                                                                                                                                                           | -7.75527 |
| GO:0097110 | scaffold protein binding                                                                                                                                                                    | -7.60723 |
| GO:0005518 | collagen binding                                                                                                                                                                            | -7.5617  |
| GO:0004197 | cysteine-type endopeptidase activity                                                                                                                                                        | -4.71094 |
| GO:0008234 | cysteine-type peptidase activity                                                                                                                                                            | -3.69406 |
| GO:0001968 | fibronectin binding                                                                                                                                                                         | -3.41776 |
| GO:0043394 | proteoglycan binding                                                                                                                                                                        | -3.22404 |
| GO:1901681 | sulfur compound binding                                                                                                                                                                     | -7.31487 |
| GO:0008201 | heparin binding                                                                                                                                                                             | -5.91406 |
| GO:0005539 | glycosaminoglycan binding                                                                                                                                                                   | -4.86328 |
| GO:0001530 | lipopolysaccharide binding                                                                                                                                                                  | -3.26038 |

|            |                                                                                                                                                                      |          |
|------------|----------------------------------------------------------------------------------------------------------------------------------------------------------------------|----------|
| GO:0001784 | phosphotyrosine residue binding                                                                                                                                      | -7.30138 |
| GO:0051219 | phosphoprotein binding                                                                                                                                               | -6.77852 |
| GO:0045309 | protein phosphorylated amino acid binding                                                                                                                            | -6.70578 |
| GO:0005158 | insulin receptor binding                                                                                                                                             | -3.8699  |
| GO:0030545 | signaling receptor regulator activity                                                                                                                                | -6.65868 |
| GO:0048018 | receptor ligand activity                                                                                                                                             | -6.37476 |
| GO:0030546 | signaling receptor activator activity                                                                                                                                | -6.30528 |
| GO:0042056 | chemoattractant activity                                                                                                                                             | -6.20529 |
| GO:0008083 | growth factor activity                                                                                                                                               | -4.99583 |
| GO:0005125 | cytokine activity                                                                                                                                                    | -2.33841 |
| GO:0002020 | protease binding                                                                                                                                                     | -6.65138 |
| GO:0004674 | protein serine/threonine kinase activity                                                                                                                             | -6.1416  |
| GO:0004707 | MAP kinase activity                                                                                                                                                  | -4.38923 |
| GO:0106310 | protein serine kinase activity                                                                                                                                       | -4.34969 |
| GO:0004708 | MAP kinase kinase activity                                                                                                                                           | -4.13991 |
| GO:0005509 | calcium ion binding                                                                                                                                                  | -5.9858  |
| GO:0005543 | phospholipid binding                                                                                                                                                 | -2.23748 |
| GO:0042562 | hormone binding                                                                                                                                                      | -5.51675 |
| GO:0050661 | NADP binding                                                                                                                                                         | -5.35086 |
| GO:0034618 | arginine binding                                                                                                                                                     | -5.28886 |
| GO:0016709 | oxidoreductase activity, acting on paired donors, with incorporation or reduction of molecular oxygen, NAD(P)H as one donor, and incorporation of one atom of oxygen | -2.99652 |
| GO:0016597 | amino acid binding                                                                                                                                                   | -2.66387 |
| GO:0005178 | integrin binding                                                                                                                                                     | -5.10293 |
| GO:0070851 | growth factor receptor binding                                                                                                                                       | -4.35108 |
| GO:0050839 | cell adhesion molecule binding                                                                                                                                       | -3.59776 |
| GO:0051427 | hormone receptor binding                                                                                                                                             | -4.86671 |
| GO:0016813 | hydrolase activity, acting on carbon-nitrogen (but not peptide) bonds, in linear amidines                                                                            | -4.82393 |
| GO:0030145 | manganese ion binding                                                                                                                                                | -2.47935 |
| GO:0033218 | amide binding                                                                                                                                                        | -4.75946 |
| GO:0042277 | peptide binding                                                                                                                                                      | -4.72632 |
| GO:0019825 | oxygen binding                                                                                                                                                       | -4.51816 |
| GO:0016209 | antioxidant activity                                                                                                                                                 | -4.34365 |
| GO:0097153 | cysteine-type endopeptidase activity involved in apoptotic process                                                                                                   | -4.38923 |
| GO:0004190 | aspartic-type endopeptidase activity                                                                                                                                 | -3.59856 |
| GO:0070001 | aspartic-type peptidase activity                                                                                                                                     | -3.55079 |
| GO:0019842 | vitamin binding                                                                                                                                                      | -4.19924 |
| GO:0072341 | modified amino acid binding                                                                                                                                          | -3.05073 |
| GO:0019207 | kinase regulator activity                                                                                                                                            | -3.9102  |
| GO:0046332 | SMAD binding                                                                                                                                                         | -3.33889 |

|            |                                             |          |
|------------|---------------------------------------------|----------|
| GO:0016788 | hydrolase activity, acting on ester bonds   | -3.165   |
| GO:0008081 | phosphoric diester hydrolase activity       | -3.14072 |
| GO:0004620 | phospholipase activity                      | -2.83975 |
| GO:0016298 | lipase activity                             | -2.5171  |
| GO:0052689 | carboxylic ester hydrolase activity         | -2.29614 |
| GO:0042578 | phosphoric ester hydrolase activity         | -2.1579  |
| GO:0001046 | core promoter sequence-specific DNA binding | -3.02648 |
| GO:0051879 | Hsp90 protein binding                       | -2.99652 |
| GO:0031072 | heat shock protein binding                  | -2.60378 |
| GO:0008238 | exopeptidase activity                       | -2.9825  |
| GO:0050840 | extracellular matrix binding                | -2.66387 |
| GO:0140272 | exogenous protein binding                   | -2.27268 |
